# Supplementary material
Source: PubMed Central journal article supplement (PMC2821456)
Supplement: NIHMS171603-supplement-1_si_001.pdf [file NIHMS171603-supplement-1_si_001.pdf]

# Organocatalytic Enantioselective Synthesis of Both Diastereomers of $\alpha$ -Hydroxyphosphinates

Sampak Samanta, Sandun Perera, and Cong-Gui Zhao\*

Department of Chemistry, University of Texas at San Antonio,  
One UTSA Circle,  
San Antonio, Texas 78249-0698

## Supporting Information

### TABLE OF CONTENTS

|                                                          |      |
|----------------------------------------------------------|------|
| Full citation of References 4a and 4b .....              | S-1  |
| General Experimental Methods .....                       | S-2  |
| Characterization Data .....                              | S-3  |
| Additional Reference .....                               | S-10 |
| HPLC Conditions .....                                    | S-11 |
| ORTEP Drawing of Compound <i>ent</i> - <b>7d</b> .....   | S-13 |
| NMR Spectra of New Compounds .....                       | S-14 |
| NOE Spectra of Compounds <b>11b</b> and <b>11c</b> ..... | S-59 |
| HPLC Analysis Spectra .....                              | S-61 |

### Full citation of References 4a and 4b

- (a) Froestl, W.; Mickel, S. J.; Hall, R. G.; von Sprecher, G.; Strub, D.; Baumann, P. A.; Brugger, F.; Gentsch, C.; Jaekel, J.; Olpe, H.-R.; Rihs, G.; Vassout, A.; Waldmeier, P. C.; Bittiger, H. *J. Med. Chem.* **1995**, *38*, 3297-

3312. (b) Froestl, W.; Mickel, S. J.; von Sprecher, G.; Diel, P. J.; Hall, R. G.; Maier, Lu.; Strub, D.; Melillo, V.; Baumann, P. A.; Bernasconi, R.; Gentsch, C.; Hauser, K.; Jaekel, J.; Karlsson's, G.; Klebs, K.; Maitre, L.; Marescaux, C.; Pozza, M. F.; Schmutz, M.; Steinmann, M. W.; van Riezen, H.; Vassout, A.; Mondadori, C.; Olpe, H.-R.; Waldmeier, P. C.; Bittiger, H. *J. Med. Chem.* **1995**, *38*, 3313-3331.

### General Experimental Methods

Unless otherwise noted,  $^1\text{H}$ ,  $^{13}\text{C}$ , and  $^{31}\text{P}$  NMR spectra were obtained on a 500 MHz spectrometer using residual solvent as the standard [ $^{31}\text{P}$  chemical shifts are reported in ppm relative to 85%  $\text{H}_3\text{PO}_4$  (external standard)]. IR spectra were recorded on VECTOR 22 model Specac ATR instrument. Melting points were recorded on MEL-TEMP melting point apparatus in open capillaries and uncorrected. TLC was performed with silica gel GF<sub>254</sub> precoated on aluminum plates (EM Sciences), and spots were visualized with UV and/or iodine vapor. Flash column chromatography was performed on silica-gel. HPLC analysis was performed on a Shimadzu instrument with LC-10AT pump and SPD-10AV UV-Vis detector. ChiralCel and ChiralPak HPLC columns were purchased from Daicel Chemical Industry, Ltd. Microanalyses were conducted by Atlantic Microlab, Inc (PO Box 2288, Norcross, Georgia 30091, USA). Compounds used in this study were purchased from Aldrich, Alfa-Aesar, Acros, TCI, or Strem, and were used as received. Catalysts **2** and **3** were prepared by using the reported procedures.<sup>20</sup> THF was freshly distilled from benzophenone and sodium metal.  $\text{CH}_2\text{Cl}_2$  and DMF were distilled from  $\text{CaH}_2$ . Unless otherwise specified, all reactions were carried out in oven-dried glassware.

## Characterization Data

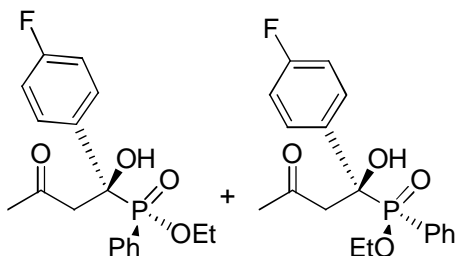

### **Ethyl [1-(4-fluorophenyl)-1-hydroxy-3-oxobutyl](phenyl)phosphinate (7b/8b):**

white powder, mp 89-90 °C ;  $^1\text{H}$  NMR (500 MHz,  $\text{CDCl}_3$ )  $\delta$  (mixture of two diastereomers) 1.27 and 1.32 (t,  $J = 7.0$  Hz, 3 H), 2.03 and 2.15 (s, 3 H), 3.05 and 3.09 (d,  $J = 8.0$  and 8.5 Hz, 0.5 H), 3.37-3.51 (m, 1.5 H), 3.74-4.16 (m, 2 H), 5.06 and 5.15 (d,  $J = 18.0$  and 13.5 Hz, 1 H), 6.80-7.62 (m, 9 H);  $^{13}\text{C}$  NMR (125 MHz,  $\text{CDCl}_3$ )  $\delta$  (mixture of two diastereomers) 16.6 (q), 32.5 (q), 46.3 and 46.8 (d), 62.2 (q), 76.2 and 76.4 (d,  $J_{\text{CP}} = 120.6$  and 118.8 Hz), 114.9 (q), 115.0 (q), 126.7(q), 128.0 (q), 128.4 (q), 132.8 (q), 133.7 (q), 135.2 (q), 161.3 and 163.5 (d), 210.1 (q);  $^{31}\text{P}$  NMR ( $\text{CDCl}_3$ )  $\delta$  (mixture of two diastereomers) 36.0, 37.3;  $\nu_{\text{max}}$  (neat,  $\text{cm}^{-1}$ ): 3156, 1724, 1601, 1507, 1438, 1355; Anal. Calcd. for  $\text{C}_{18}\text{H}_{20}\text{FO}_4\text{P}$ : C, 61.71; H, 5.75; Found: C, 61.99; H, 5.79.

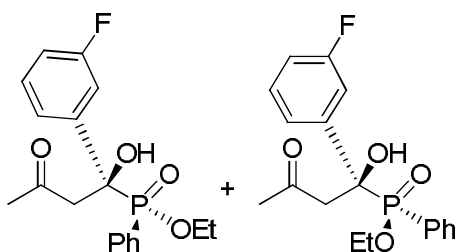

### **Ethyl [1-(3-fluorophenyl)-1-hydroxy-3-oxobutyl](phenyl)phosphinate (7c/8c):**

white powder, mp 75-76 °C;  $^1\text{H}$  NMR (500 MHz,  $\text{CDCl}_3$ )  $\delta$  (mixture of two diastereomers) 1.15 and 1.35 (t,  $J = 7.0$  Hz, 3 H), 2.06 and 2.18 (s, 3 H), 3.07 and 3.10 (d,  $J = 8.0$  Hz, 0.5 H), 3.39-3.53 (m, 1.5 Hz), 3.70-4.15 (m, 2 H), 5.06 and 5.16 (2 br s, 1 H), 6.81-7.65 (m, 9 H);  $^{13}\text{C}$  NMR (125 MHz,  $\text{CDCl}_3$ )  $\delta$  (mixture of two diastereomers) 16.6

(q), 32.4, (q), 46.7 (q), 62.3 (q), 76.3 and 76.5 (d,  $J_{CP} = 121.5$  and  $122.5$  Hz), 113.5 (q), 114.6 (q), 121.9 (q), 126.9 (q), 128.3 (q), 129.5 (q), 132.8 (q), 133.6 (q), 142.2 (q), 161.7 and 163.8 (d), 209.8 (q);  $^{31}\text{P}$  NMR ( $\text{CDCl}_3$ )  $\delta$  (mixture of two diastereomers) 38.1, 39.5;  $\nu_{\text{max}}$  (neat,  $\text{cm}^{-1}$ ): 3170, 1723, 1601, 1507, 1357; Anal. Calcd. for  $\text{C}_{18}\text{H}_{20}\text{FO}_4\text{P}$ : C, 61.71; H, 5.75; Found: C, 61.73; H, 5.82.

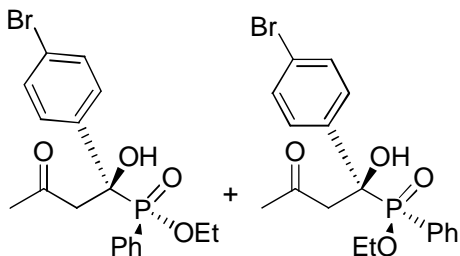

**Ethyl [1-(4-bromophenyl)-1-hydroxy-3-oxobutyl](phenyl)phosphinate (7d/8d):**

Colorless needles mp 95-97 °C;  $^1\text{H}$  NMR (500 MHz,  $\text{CDCl}_3$ )  $\delta$  (mixture of two diastereomers) 1.14 and 1.34 (t,  $J = 7.0$  Hz, 3 H), 2.05 and 2.17 (s, 3 H), 3.04 and 3.08 (d,  $J = 8.5$  and  $7.5$  Hz, 0.5 H), 3.33-3.51 (m, 1.5 H), 3.75-3.18 (m, 2 H), 5.02 and 5.14 (d,  $J = 19.5$  and  $17.5$  Hz, 1 H), 7.15-7.65 (m, 9 H);  $^{13}\text{C}$  NMR (125 MHz,  $\text{CDCl}_3$ )  $\delta$  (mixture of two diastereomers) 16.6 (q), 32.5 (q), 62.3 (q), 76.4 and 76.5 (d,  $J_{CP} = 120.1$  and  $118.3$  Hz), 122.0 (q), 126.7 (q), 128.1 (q), 128.7 (q), 131.2 (q), 132.8 (q), 133.7 (q), 138.5 (q), 210.1 (q);  $^{31}\text{P}$  NMR ( $\text{CDCl}_3$ )  $\delta$  (mixture of two diastereomers) 37.8, 38.1;  $\nu_{\text{max}}$  (neat,  $\text{cm}^{-1}$ ): 3282, 1722, 1590, 1480, 1438, 1394, 1353; Anal. Calcd. for  $\text{C}_{18}\text{H}_{20}\text{BrO}_4\text{P}$ : C, 52.57; H, 4.90; Found: C, 52.63; H, 4.89.

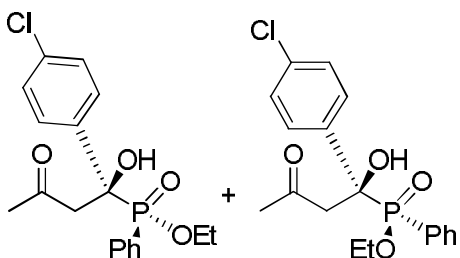

**Ethyl [1-(4-chlorophenyl)-1-hydroxy-3-oxobutyl](phenyl)phosphinate (7e/8e):**

Colorless crystalline square, mp 118-119 °C;  $^1\text{H}$  NMR (500 MHz,  $\text{CDCl}_3$ )  $\delta$  (mixture of two diastereomers) 1.13 and 1.31 (t,  $J = 7.0$  Hz, 3H), 2.02 and 2.13 (s, 3 H), 3.10 and 3.13 (d,  $J = 8.5$  Hz, 0.5 H), 3.35-3.50 (m, 1.5 H), 3.75-4.15 (m, 2 H), 5.23 (br s, 1 H), 7.09-7.63 (m, 9 H);  $^{13}\text{C}$  NMR (125 MHz,  $\text{CDCl}_3$ )  $\delta$  (mixture of two diastereomers) 16.6 and 16.7 (d), 32.4 (q), 62.3 (q), 76.2 and 76.5 (d,  $J_{\text{CP}} = 120.3$  and 123.0 Hz), 126.4 (q), 127.7 (q), 128.2 (q), 128.3 (q), 132.8 (q), 133.4 (q), 137.9 (q), 209.8 (q);  $^{31}\text{P}$  NMR ( $\text{CDCl}_3$ )  $\delta$  (mixture of two diastereomers) 38.0, 39.3;  $\nu_{\text{max}}$  (neat,  $\text{cm}^{-1}$ ): 3147, 1723, 1591, 1489, 1439, 1406, 1356; Anal. Calcd. for  $\text{C}_{18}\text{H}_{20}\text{ClO}_4\text{P}$ : C, 58.94; H, 5.50; Found: C, 58.74; H, 5.47.

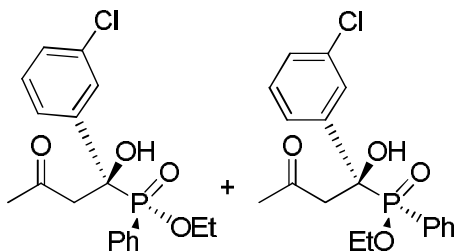

**Ethyl [1-(3-chlorophenyl)-1-hydroxy-3-oxobutyl](phenyl)phosphinate (7f/8f):**

white powder, mp 110-111 °C;  $^1\text{H}$  NMR (500 MHz,  $\text{CDCl}_3$ )  $\delta$  (mixture of two diastereomers) 1.15 and 1.35 (t,  $J = 7.0$  Hz, 3 H), 2.07 and 2.19 (s, 3 H), 3.07 and 3.11 (d,  $J = 8.0$  and 8.5 Hz, 0.5 H), 3.37-3.51 (m, 1.5 H), 3.77-4.19 (m, 2 H), 5.04 and 5.16 (d,  $J = 19.0$  and 16.0 Hz, 1 H), 7.10-7.65 (m, 9 H);  $^{13}\text{C}$  NMR (125 MHz,  $\text{CDCl}_3$ )  $\delta$  (mixture of two diastereomers) 16.5 (q), 32.4 (q), 46.6 (q), 62.4 (q), 76.3 and 76.5 (d,  $J_{\text{CP}} = 120.2$  and 122.5 Hz), 124.4 and 124.8 (d), 126.6 and 127.1 (d), 127.8 and 127.9 (d), 128.0 and 128.1 (d), 128.1 and 128.2 (d), 129.3 and 129.4 (d), 132.8 and 133.0 (d), 133.4 and 133.8 (d), 141.6 and 141.9 (d), 209.9 (q);  $^{31}\text{P}$  NMR ( $\text{CDCl}_3$ )  $\delta$  (mixture of two diastereomers)

37.8, 39.2;  $\nu_{\max}$  (neat,  $\text{cm}^{-1}$ ): 3144, 1721, 1591, 1489, 1440, 1410  $\text{cm}^{-1}$ ; Anal. Calcd. for  $\text{C}_{18}\text{H}_{20}\text{ClO}_4\text{P}$ : C, 58.94; H, 5.50; Found: C, 58.84; H, 5.43.

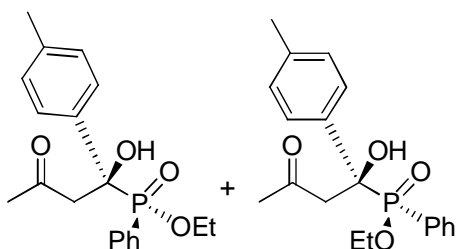

**Ethyl [1-hydroxy-1-(4-methylphenyl)-3-oxobutyl](phenyl)phosphinate (7g/8g):**

Crystalline solid, mp 101-102 °C;  $^1\text{H}$  NMR (500 MHz,  $\text{CDCl}_3$ )  $\delta$  (mixture of two diastereomers) 1.12 and 1.32 (t,  $J = 7.0$  Hz, 3 H), 2.01 and 2.11 (s, 3 H), 2.21 and 2.30 (s, 3 H), 3.02-3.07 (m, 0.5 H), 3.36-3.54 (m, 1.5 H), 3.72-4.15 (m, 2 H), 4.94-5.03 (br s, 1 H), 6.99-7.63 (m, 9 H);  $^{13}\text{C}$  NMR (125 MHz,  $\text{CDCl}_3$ )  $\delta$  (mixture of two diastereomers) 16.6 (q), 32.5 (q), 46.5 and 47.0 (d), 62.1 (d), 76.4 and 76.5 (d,  $J_{\text{CP}} = 120.6$  and 121.3 Hz), 126.1 (q), 126.5 (q), 127.4 (q), 128.9 (q), 132.5 (q), 133.5 (q), 136.1 (q), 137.4 (q), 210.1 (q);  $^{31}\text{P}$  NMR ( $\text{CDCl}_3$ )  $\delta$  (mixture of two diastereomers) 38.2, 39.6;  $\nu_{\max}$  (neat,  $\text{cm}^{-1}$ ): 3228, 1702, 1592, 1510, 1474, 1439, 1411, 1388, 1356; Anal. Calcd. for  $\text{C}_{19}\text{H}_{23}\text{O}_4\text{P}$ : C, 65.89; H, 6.69; Found: C, 66.15; H, 6.78.

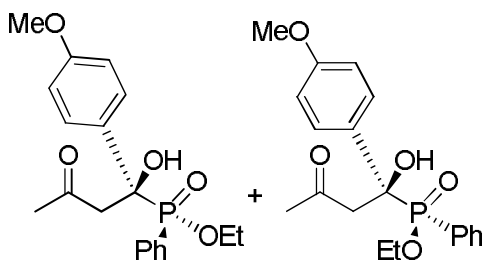

**Ethyl [1-hydroxy-1-(4-methoxyphenyl)-3-oxobutyl](phenyl)phosphinate (7h/8h):**

Colorless needles, mp 103-105 °C;  $^1\text{H}$  NMR (500 MHz,  $\text{CDCl}_3$ )  $\delta$  (mixture of two diastereomers) 1.14 and 1.34 (t,  $J = 7.0$  Hz, 3 H), 2.04 and 2.15 (s, 3 H), 3.01 and 3.02 (d,  $J = 8.5$  Hz, 0.5 H), 3.36-3.57 (m, 1.5 H), 3.71-4.16 (m, 5 H), 4.88 and 5.01 (d,  $J = 18.0$

and 15.5 Hz, 1 H), 6.68 and 6.84 (d,  $J = 8.5$  Hz, 2 H), 7.17-7.65 (m, 7 H);  $^{13}\text{C}$  NMR (125 MHz,  $\text{CDCl}_3$ )  $\delta$  (mixture of two diastereomers) 16.7 (q), 32.6 (d), 46.3 and 46.8 (d), 55.4 (d), 62.1 (q), 76.3 and 76.4 (d,  $J_{\text{CP}} = 121.5$  and  $120.3$  Hz), 113.5 (q), 126.9 (q), 127.5 (q), 128.2 (q), 131.1 (q), 132.5 (q), 133.5 (q), 159.1 (q), 210.3 (q);  $^{31}\text{P}$  NMR ( $\text{CDCl}_3$ )  $\delta$  (mixture of two diastereomers) 38.3, 39.7;  $\nu_{\text{max}}$  (neat,  $\text{cm}^{-1}$ ): 3241, 1701, 1598, 1510, 1439, 1412, 1378, 1361; Anal. Calcd. for  $\text{C}_{19}\text{H}_{23}\text{O}_5\text{P}$ : C, 62.98; H, 6.40; Found: C, 62.76; H, 6.41.

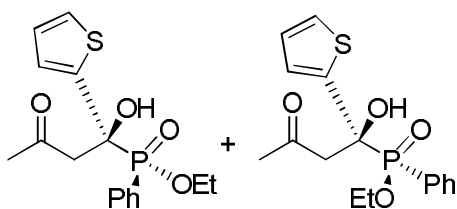

**Ethyl [1-hydroxy-3-oxo-1-(thiophen-2-yl)butyl](phenyl)phosphinate (7i/8i):**

Yellowish solid, mp 89-90 °C;  $^1\text{H}$  NMR (500 MHz,  $\text{CDCl}_3$ )  $\delta$  (mixture of two diastereomers) 1.21 and 1.35 (t,  $J = 7.0$  Hz, 3 H), 2.10 and 2.20 (s, 3 H), 3.05 (dd,  $J_1 = 8.0$ ,  $J_2 = 16.5$  Hz, 0.5 H), 3.37-3.48 (m, 1.5 H), 3.85-4.21 (m, 2 H), 5.47 and 5.53 (d,  $J = 21.5$  and  $18.5$  Hz, 1 H), 6.84-7.71 (m 8 H);  $^{13}\text{C}$  NMR (125 MHz,  $\text{CDCl}_3$ )  $\delta$  (mixture of two diastereomers) 16.6 (q), 32.6 (q), 46.7 and 47.4 (d), 62.5 (q), 76.1 and 76.4 (d,  $J_{\text{CP}} = 125.0$  and  $123.5$  Hz), 125.1 (q), 125.8 (q), 126.5 (q), 127.3 (q), 128.4 (q), 132.9 (q), 133.7 (q), 144.1 (q), 210.2 (q);  $^{31}\text{P}$  NMR ( $\text{CDCl}_3$ )  $\delta$  (mixture of two diastereomers) 36.5, 37.9;  $\nu_{\text{max}}$  (neat,  $\text{cm}^{-1}$ ): 3219, 1715, 1591, 1442; Anal. Calcd. for  $\text{C}_{16}\text{H}_{19}\text{O}_4\text{PS}$ : C, 56.80; H, 5.66. Found: C, 56.81; H, 5.65.

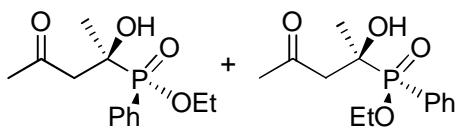

**Ethyl (1-hydroxy-1-methyl-3-oxobutyl)(phenyl)phosphinate (7j/8j):** Colorless oil;  $^1\text{H}$  NMR (500 MHz,  $\text{CDCl}_3$ )  $\delta$  (mixture of two diastereomers) 1.26 and 1.48 (d,  $J = 16.5$  and 14.0 Hz, 3 H), 1.28 and 1.32 (t,  $J = 7.5$  and 7.0 Hz, 3 H), 2.17 and 2.26 (s, 3 H), 2.54-2.66 (m, 1 H), 2.92 and 3.20 (dd,  $J_1 = 8.5$ ,  $J_2 = 16.5$  Hz, 1 H), 3.85-4.16 (m, 2 H), 4.62 and 4.88 (d,  $J = 11.5$  and 9.0 Hz, 1 H), 7.45-7.56 (m, 3 H), 7.80-7.86 (m, 2 H);  $^{13}\text{C}$  NMR (125 MHz,  $\text{CDCl}_3$ )  $\delta$  (mixture of two diastereomers) 16.7 (q), 23.0 (q), 32.5 (q), 46.9 (q), 61.8 (q), 72.6 and 72.7 (d,  $J_{\text{CP}} = 120.3$  and 122.5 Hz), 127.8 (q), 128.6 (q), 132.8 (q), 133.7 (q), 210.3 (q);  $^{31}\text{P}$  NMR ( $\text{CDCl}_3$ )  $\delta$  (mixture of two diastereomers) 39.6, 40.6;  $\nu_{\text{max}}$  (neat,  $\text{cm}^{-1}$ ): 3191, 1712, 1592, 1479, 1439, 1368; Anal. Calcd. for  $\text{C}_{13}\text{H}_{19}\text{O}_4\text{P}$ : C, 57.77; H, 7.09; Found: C, 58.19; H, 7.36.

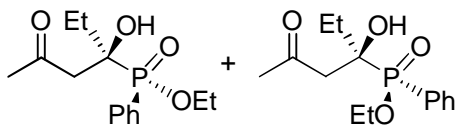

**Ethyl (1-ethyl-1-hydroxy-3-oxobutyl)(phenyl)phosphinate (7k/8k):** Colorless oil;  $^1\text{H}$  NMR (500 MHz,  $\text{CDCl}_3$ )  $\delta$  (mixture of two diastereomers) 0.85 and 1.00 (t,  $J = 7.00$  Hz, 3 H), 1.26 and 1.33 (t,  $J = 7.0$  Hz, 3 H), 2.18 and 2.34 (s, 3 H), 1.45-1.92 (m, 2 H), 2.55-2.70 (m, 1 H), 2.87 and 3.19 (dd,  $J_1 = 8.0$ , 18.0 and  $J_2 = 5.5$ , 16.3 Hz, 1 H), 3.79-4.15 (m, 2 H), 4.84 and 5.19 (d,  $J = 7.5$  and 4.0 Hz, 1 H), 7.45-7.58 (m, 3 H), 7.80-7.89 (m, 2 H);  $^{13}\text{C}$  NMR (125 MHz,  $\text{CDCl}_3$ )  $\delta$  (mixture of two diastereomers) 7.2 and 7.8 (q), 16.6 and 16.8 (q), 28.9 (q), 32.4 (q), 61.6 (q), 75.4 & 75.7 (d,  $J_{\text{CP}} = 118.8$  and 120.1 Hz), 127.8 (q), 128.6 (q), 132.8 (q), 133.7 (q), 211.8 (q);  $^{31}\text{P}$  NMR ( $\text{CDCl}_3$ )  $\delta$  (mixture of two diastereomers) 40.8, 41.4;  $\nu_{\text{max}}$  (neat,  $\text{cm}^{-1}$ ): 3210, 1708, 1592, 1439, 1398; Anal. Calcd. for  $\text{C}_{14}\text{H}_{21}\text{O}_4\text{P}$ : C, 59.15; H, 7.45; Found: C, 59.03; H, 7.64.



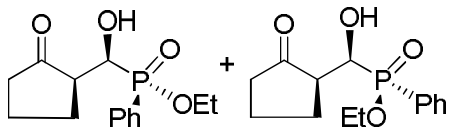

**Ethyl [hydroxy(2-oxocyclopentyl)methyl](phenyl)phosphinate (10b/11b)** Colorless gummy liquid;  $^1\text{H}$  NMR (500 MHz,  $\text{CDCl}_3$ )  $\delta$  (*syn*, mixture of two diastereomers) 1.30 (m, 3 H), 1.65-1.72(m, 1 H), 1.86-2.06 (m, 4 H), 2.22-2.48 (m, 2 H), 3.88-4.16 (m, 2 H), 4.57-4.67 (m, 1 H), 7.44-7.57 (m, 3 H), 7.80-7.85 (m, 2 H);  $^{13}\text{C}$  NMR (125 MHz,  $\text{CDCl}_3$ )  $\delta$  (*syn*, mixture of two diastereomers) 16.7 (q), 20.9 (t), 23.2 (d), 38.3 (q), 49.9 (q), 61.7 (q), 68.1 and 68.5 (d,  $J_{\text{CP}} = 120.6$  and 118.3 Hz), 128.3 and 129.3 (d,  $J_{\text{CP}} = 14.8$  and 14.9 Hz), 128.8 (q), 132.7 (q), 132.9 (q), 219.5 (t);  $^{31}\text{P}$  NMR ( $\text{CDCl}_3$ )  $\delta$  (mixture of two diastereomers) 39.3, 39.4;  $\nu_{\text{max}}$  (neat,  $\text{cm}^{-1}$ ): 3226, 1732, 1591, 1439 1390; Anal. Calcd. for  $\text{C}_{14}\text{H}_{19}\text{O}_4\text{P}$ : C, 59.57; H, 6.78; Found: C, 59.60; H, 6.79.

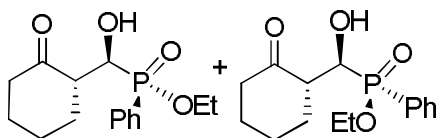

**Ethyl [hydroxy(2-oxocyclohexyl)methyl](phenyl)phosphinate (10c/11c):** Colorless oil;  $^1\text{H}$  NMR (500 MHz,  $\text{CDCl}_3$ )  $\delta$  (mixture of diastereomers) 1.29 (m, 3 H), 1.53-1.93 (m, 5 H), 2.14-2.32 (m, 3 H), 2.70-2.94 (m, 1 H), 3.73-4.09 (m, 2 H), 4.15-4.73 (m, 1 H), 7.35-7.40 (m, 2 H), 7.43-7.49 (m, 1 H), 7.73-7.78 (m, 2 H);  $^{13}\text{C}$  NMR (125 MHz,  $\text{CDCl}_3$ ) (major isomer, mixture of two diastereomers)  $\delta$  16.6 (q), 24.8 (q), 27.5 (q), 31.5 (q), 42.2 (q), 52.2 (q), 61.2 (q), 70.6 and 71.4 (d,  $J_{\text{CP}} = 116.1$  and 113.5 Hz), 128.0 (q), 128.7 (q), 132.5 (q), 132.9 (q), 214.1 (d);  $^{31}\text{P}$  NMR ( $\text{CDCl}_3$ )  $\delta$  (mixture of diastereomers) 38.7, 39.1; 39.6; 40.9;  $\nu_{\text{max}}$  (neat,  $\text{cm}^{-1}$ ): 3246, 1706, 1591, 1439, 1390, 1313; Anal. Calcd. for  $\text{C}_{15}\text{H}_{21}\text{O}_4\text{P}$ : C, 60.80; H, 7.14; Found: C, 61.01; H, 7.35.

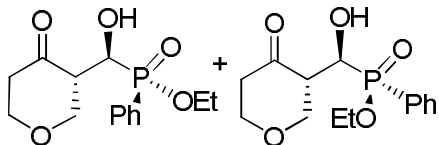

**Ethyl [hydroxy(4-oxotetrahydro-2H-pyran-3-yl)methyl](phenyl)phosphinate**

**(10d/11d)**: Colorless oil;  $^1\text{H}$  NMR (500 MHz,  $\text{CDCl}_3$ )  $\delta$  (mixture of diastereomers) 1.28-1.38 (m, 3H), 2.42-2.64 (m, 1H), 3.57 (br s, 1H), 3.66-4.18 (m, 5H), 4.23-4.77 (m, 2H), 7.47-7.58 (m, 3H), 7.77-7.93 (m, 2H);  $^{13}\text{C}$  NMR (125 MHz,  $\text{CDCl}_3$ ) (major isomer, mixture of two diastereomers)  $\delta$  16.7 (d), 42.8 (d), 52.2 (d), 53.1 (d), 61.7 (d), 66.1 & 66.6 (d,  $J_{\text{CP}} = 122.12$  and  $120.62$  Hz), 68.7 (q), 127.3 (q), 128.7 (q), 132.8 (q), 133.1 (d), 206.5 (q);  $^{31}\text{P}$  NMR ( $\text{CDCl}_3$ )  $\delta$  (mixture of diastereomers) 37.7, 38.8, 38.9, 39.5;  $\nu_{\text{max}}$  (neat,  $\text{cm}^{-1}$ ): 3245, 1715, 1591, 1476, 1439, 1373  $\text{cm}^{-1}$ ; Anal. Calcd. for  $\text{C}_{14}\text{H}_{19}\text{O}_5\text{P}$ : C, 56.37; H, 6.42. Found: C, 56.38; H, 6.50.

**Additional Reference**

- (20) (a) Almquist, R. G.; Chao, W. R.; Jennings-White, C. *J. Med. Chem.* **1985**, *28*, 1067-1071. (b) Berkessel, A.; Koch, B.; Lex, J. *Adv. Syn. Catal.* **2004**, *346*, 1141-1146.

### HPLC Conditions

| Compound                                                                            | Eluent<br><i>i</i> -PrOH/Hexane | Column | UV Det.<br>(nm) | Flow rate<br>(mL/min) |
|-------------------------------------------------------------------------------------|---------------------------------|--------|-----------------|-----------------------|
| 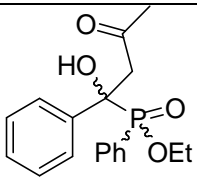   | 5/95                            | AD-H   | 220             | 0.5                   |
|    | 5/95                            | AD-H   | 220             | 1                     |
|   | 5/95                            | AD-H   | 220             | 0.8                   |
|  | 5/95                            | AD-H   | 220             | 1                     |
|  | 5/95                            | AD-H   | 220             | 1                     |
|  | 5/95                            | AD-H   | 220             | 0.8                   |

| Compound                                                                            | Eluent<br><i>i</i> -PrOH/Hexane | Column         | UV Det.<br>(nm) | Flow rate<br>(mL/min) |
|-------------------------------------------------------------------------------------|---------------------------------|----------------|-----------------|-----------------------|
| 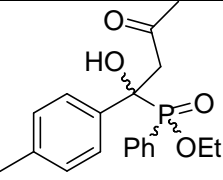   | 5/95                            | AD-H           | 220             | 0.8                   |
|    | 5/95                            | AD-H           | 220             | 1                     |
|    | 4/96                            | OJ-H           | 220             | 0.4                   |
|   | 3/97                            | OJ-H           | 220             | 0.3                   |
|  | 3/97                            | OJ-H<br>& AD-H | 220             | 0.3                   |
|  | 5/95                            | AS             | 220             | 0.8                   |
|  | 5/95                            | AD-H           | 220             | 1                     |
|  | 5/95                            | AD-H           | 220             | 1                     |
|  | 7/93                            | OJ-H           | 220             | 1                     |

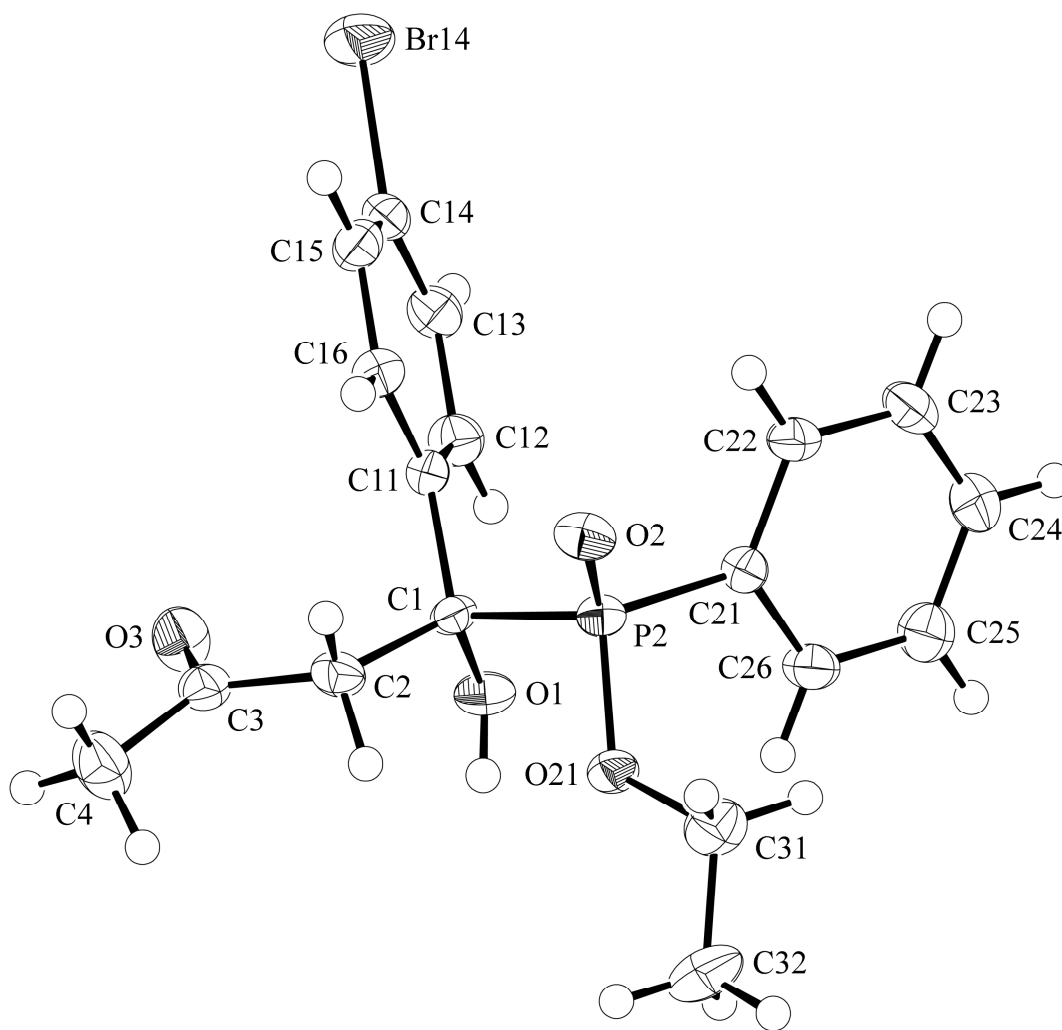

**Figure 2.** ORTEP Drawing of Compound *ent-7d*

Archive directory: /export/home/vnmr1/vnmrsys/data  
Sample directory:  
File: PROTON

Pulse Sequence: s2pul  
Solvent: CDCl3  
Ambient temperature  
INOVA-500 "Inova500"

Relax. delay 1.000 sec  
Pulse 24.5 degrees  
Acq. time 1.892 sec  
Width 7995.2 Hz  
128 repetitions  
OBSERVE H1, 499.6299995 MHz  
DATA PROCESSING  
FT size 32768  
Total time 6 min, 11 sec

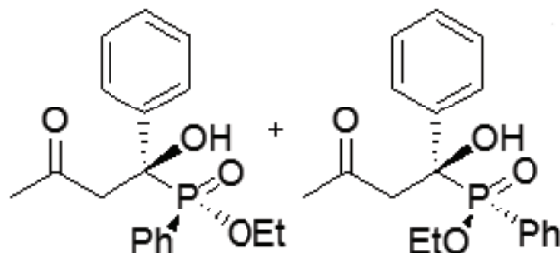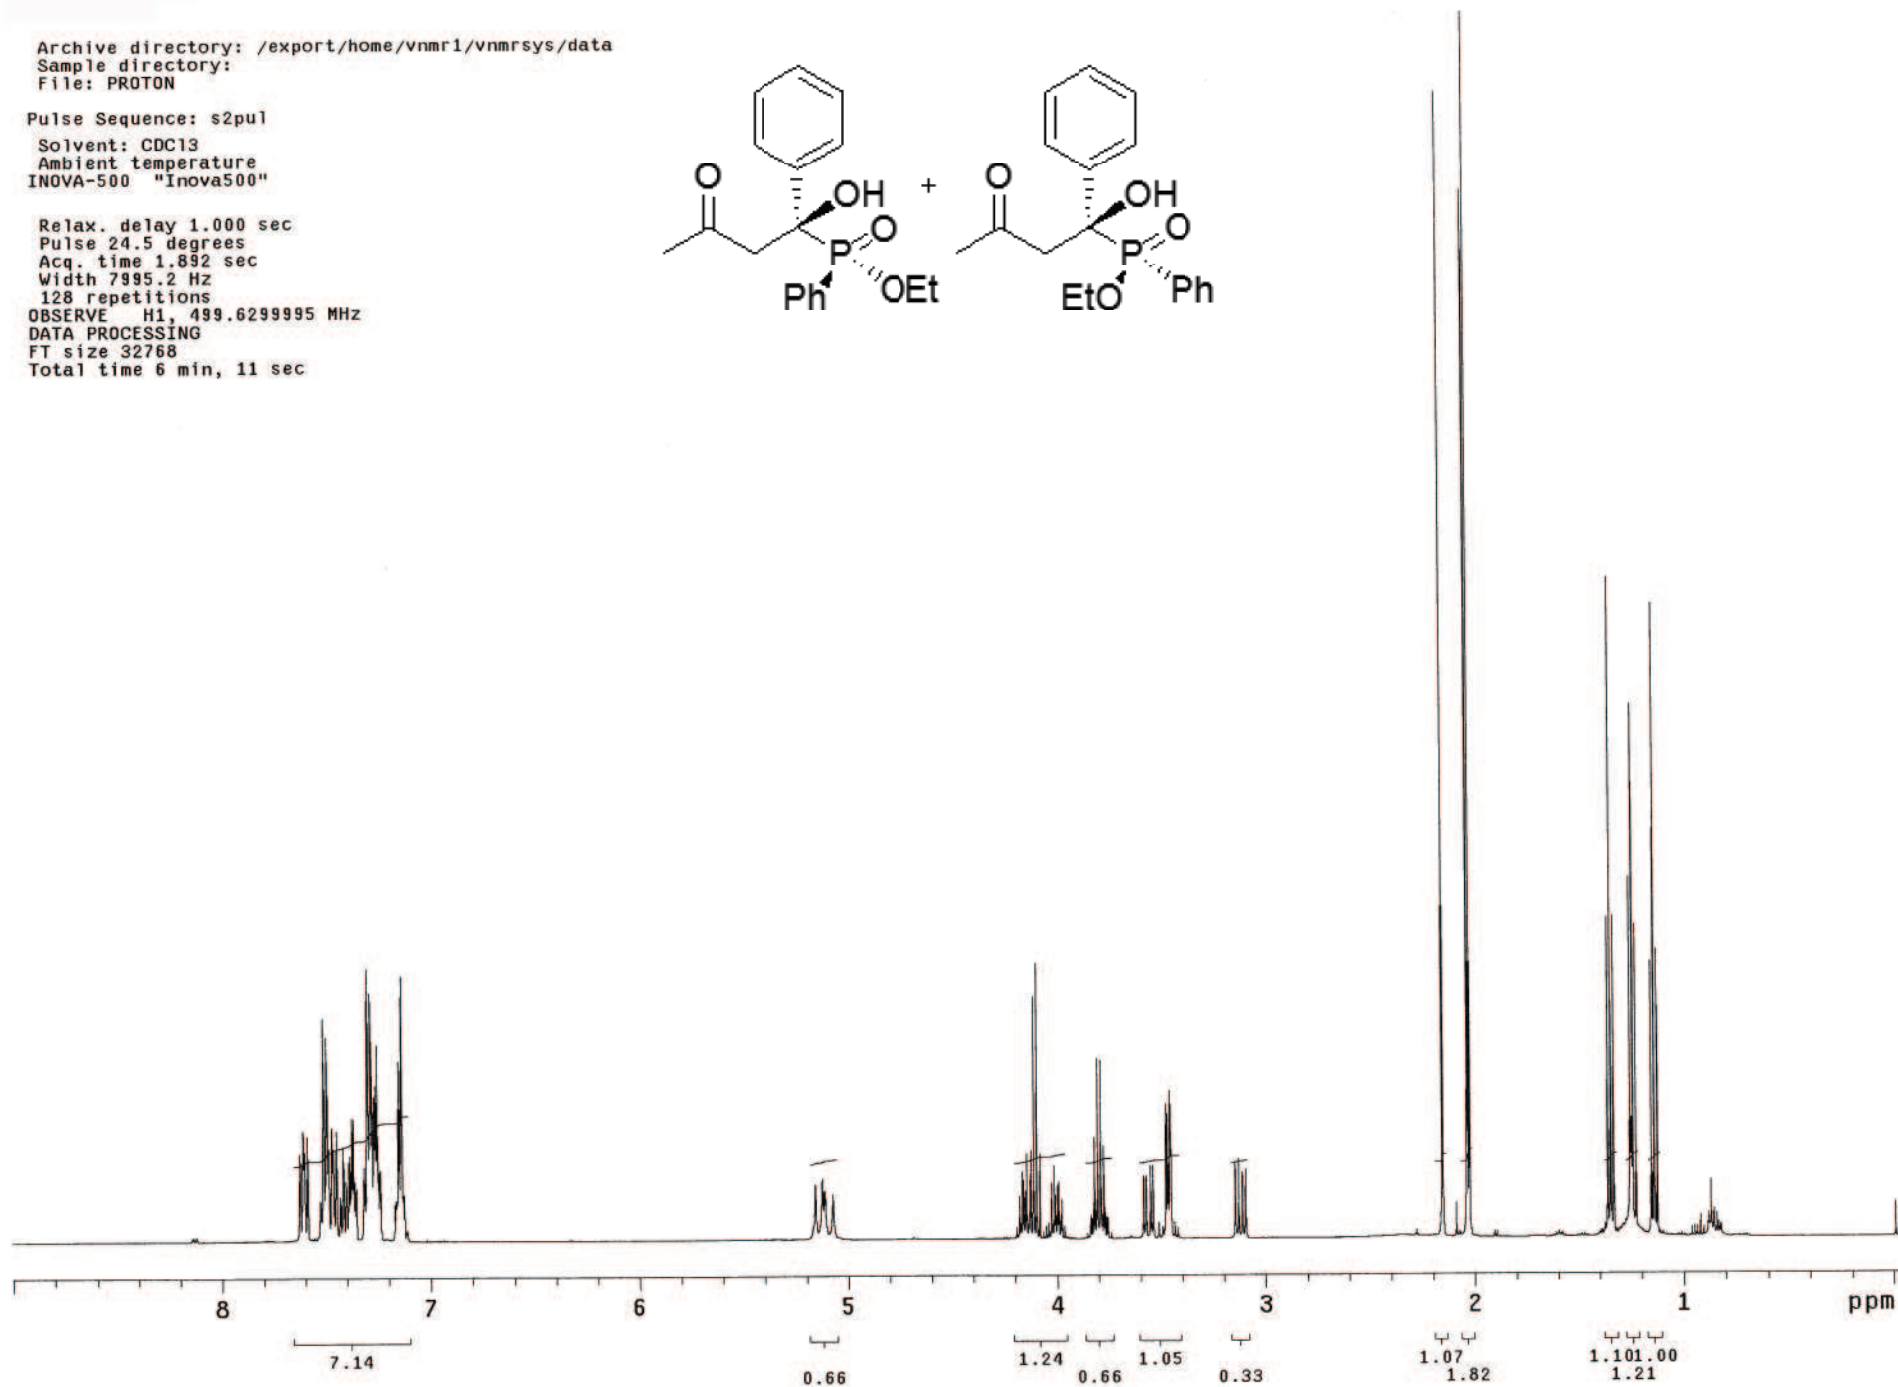

STANDARD CARBON PARAMETERS

Archive directory: /home/samanta/vnmrsys/data  
 Sample directory:  
 File: CARBON

Pulse Sequence: s2pu1  
 Solvent: CDC13  
 Ambient temperature  
 User: 1-14-87  
 INOVA-500 "Inova500"

Relax. delay 1.000 sec  
 Pulse 45.0 degrees  
 Acq. time 1.300 sec  
 Width 31409.5 Hz  
 20000 repetitions  
 OBSERVE C13, 125.6479222 MHz  
 DECOUPLE H1, 499.6956872 MHz  
 Power 36 dB  
 continuously on  
 WALTZ-16 modulated  
 DATA PROCESSING  
 Line broadening 0.5 Hz  
 FT size 131072  
 Total time 12 hr, 49 min, 47 sec

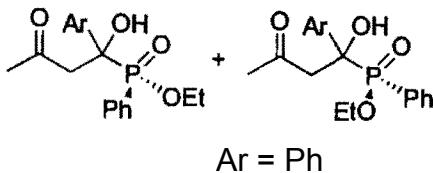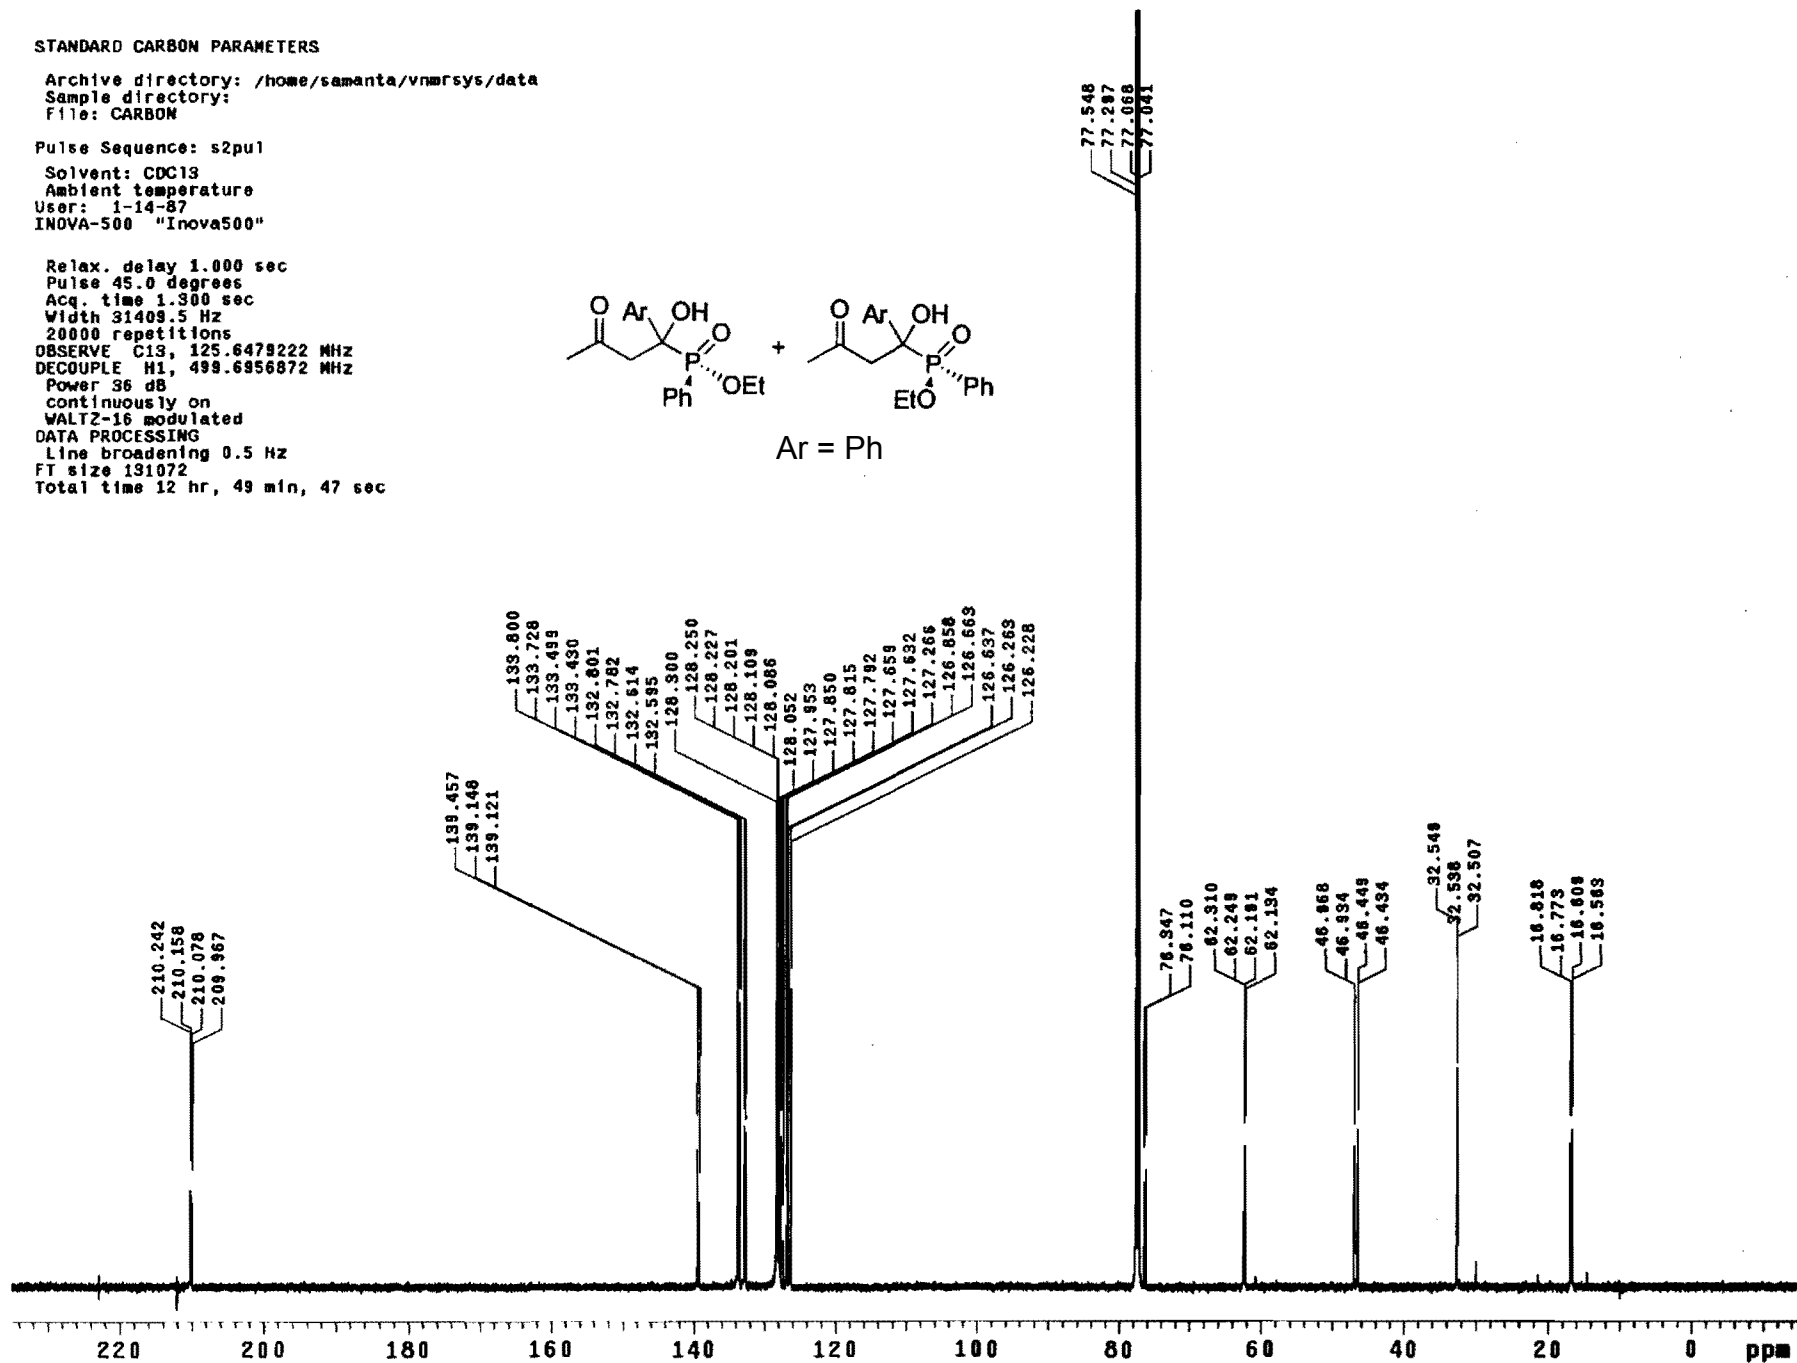

exp3 s2pu1

|             |             |            |          |
|-------------|-------------|------------|----------|
| SAMPLE      |             | SPECIAL    |          |
| date        | Nov 24 2009 | temp       | not used |
| solvent     | D2O         | gain       | not used |
| file        | exp         | spin       | not used |
| ACQUISITION |             | hst        | 0.008    |
| sw          | 40140.5     | pw90       | 8.300    |
| at          | 1.600       | alfa       | 10.000   |
| np          | 128450      | FLAGS      |          |
| fb          | 22000       | il         | n        |
| bs          | 64          | in         | n        |
| d1          | 1.000       | dp         | y        |
| nt          | 4           | hs         | ny       |
| ct          | 4           | PROCESSING |          |
| TRANSMITTER |             | lb         | 1.00     |
| tn          | P31         | fn         | not used |
| sfrq        | 202.254     | DISPLAY    |          |
| tof         | 5050.4      | sp         | -47.2    |
| tpwr        | 54          | wp         | 10162.7  |
| pw          | 3.228       | rfl        | 20140.4  |
| DECOUPLER   |             | rfp        | 0        |
| dn          | H1          | rp         | 98.3     |
| dof         | 0           | lp         | -1152.0  |
| dm          | yyy         | PLOT       |          |
| dmm         | w           | wc         | 250      |
| dpwr        | 36          | sc         | 0        |
| dmf         | 10954       | vs         | 104      |
|             |             | th         | 81       |
|             |             | nm         | cdc ph   |

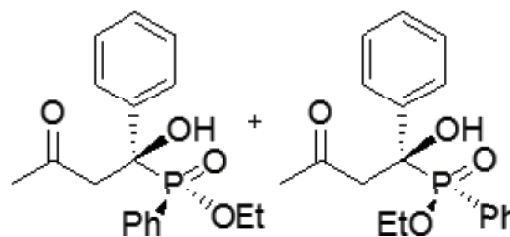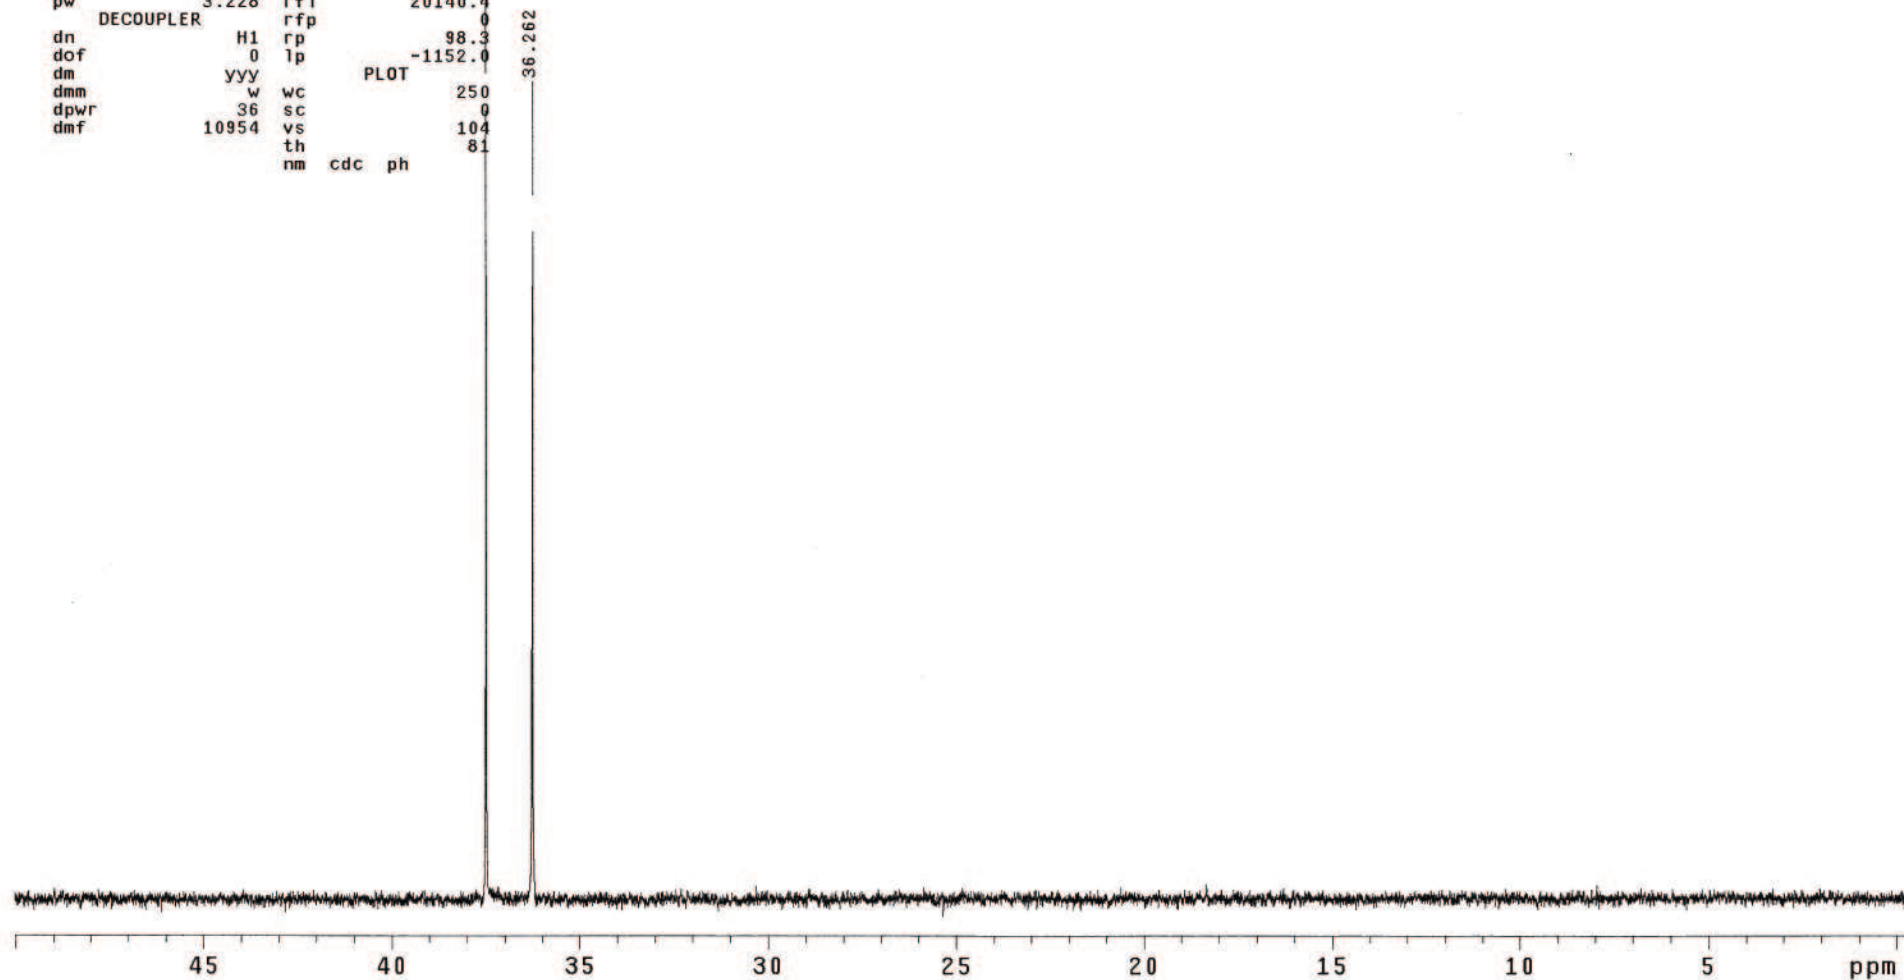



Archive directory: /export/home/vnmr1/vnmrsys/data  
Sample directory:  
File: PROTON

Pulse Sequence: s2pu1  
Solvent: CDCl3  
Ambient temperature  
Mercury-300BB "varian300"

Relax. delay 1.000 sec  
Pulse 52.0 degrees  
Acq. time 1.998 sec  
Width 4789.3 Hz  
64 repetitions  
OBSERVE H1, 299.9597215 MHz  
DATA PROCESSING  
FT size 32768  
Total time 3 min, 15 sec

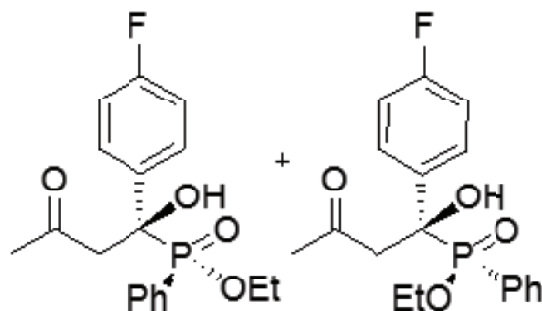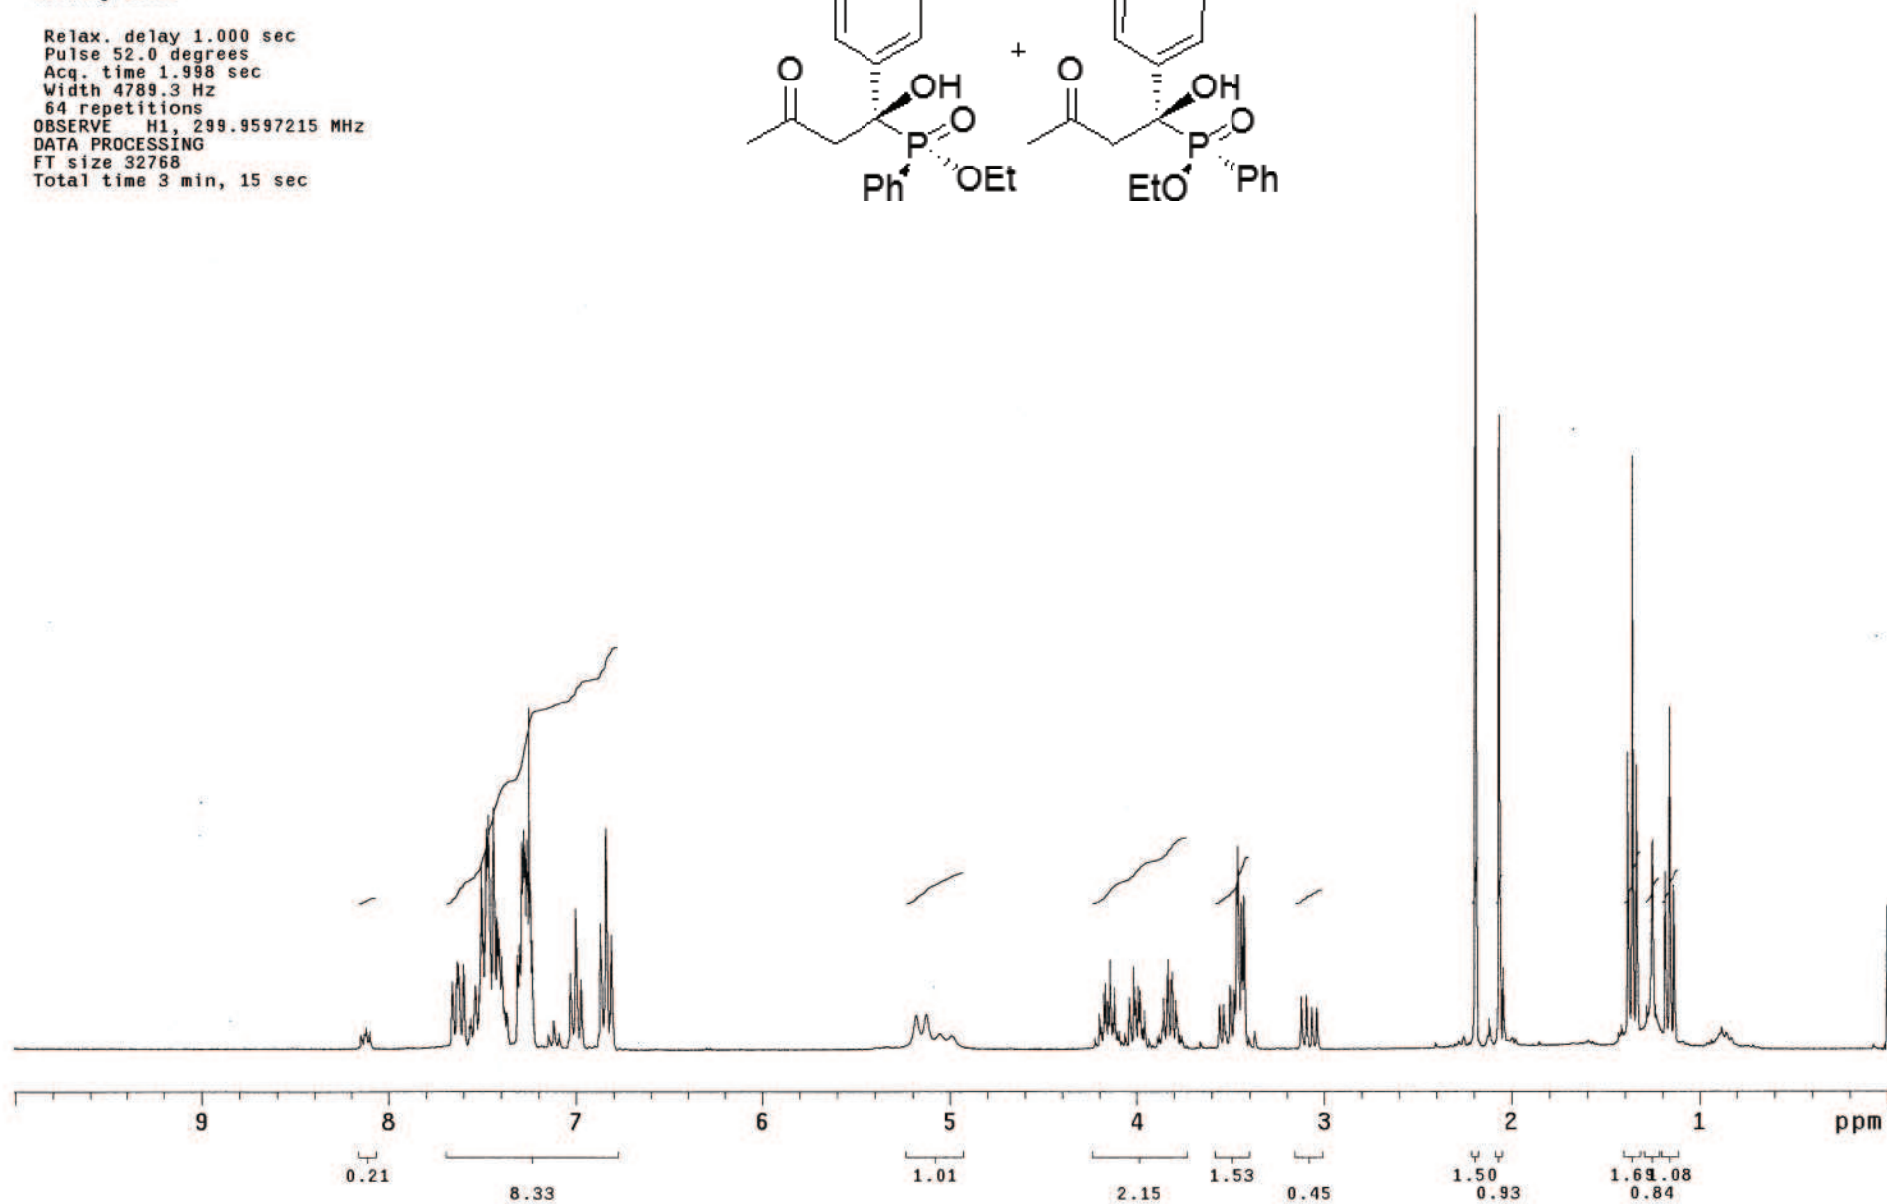

STANDARD CARBON PARAMETERS  
v-ss-79c

Archive directory: /home/samanta/vnmrsys/data  
Sample directory:

Pulse Sequence: s2pu1

Solvent: CDCl3  
Ambient temperature  
User: 1-14-87  
File: v-ss-79c  
INOVA-500 "Inova500"

Relax. delay 1.000 sec  
Pulse 45.0 degrees  
Aca. time 1.300 sec

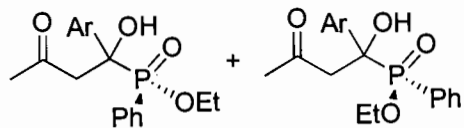

Ar = 4-F-C<sub>6</sub>H<sub>4</sub>

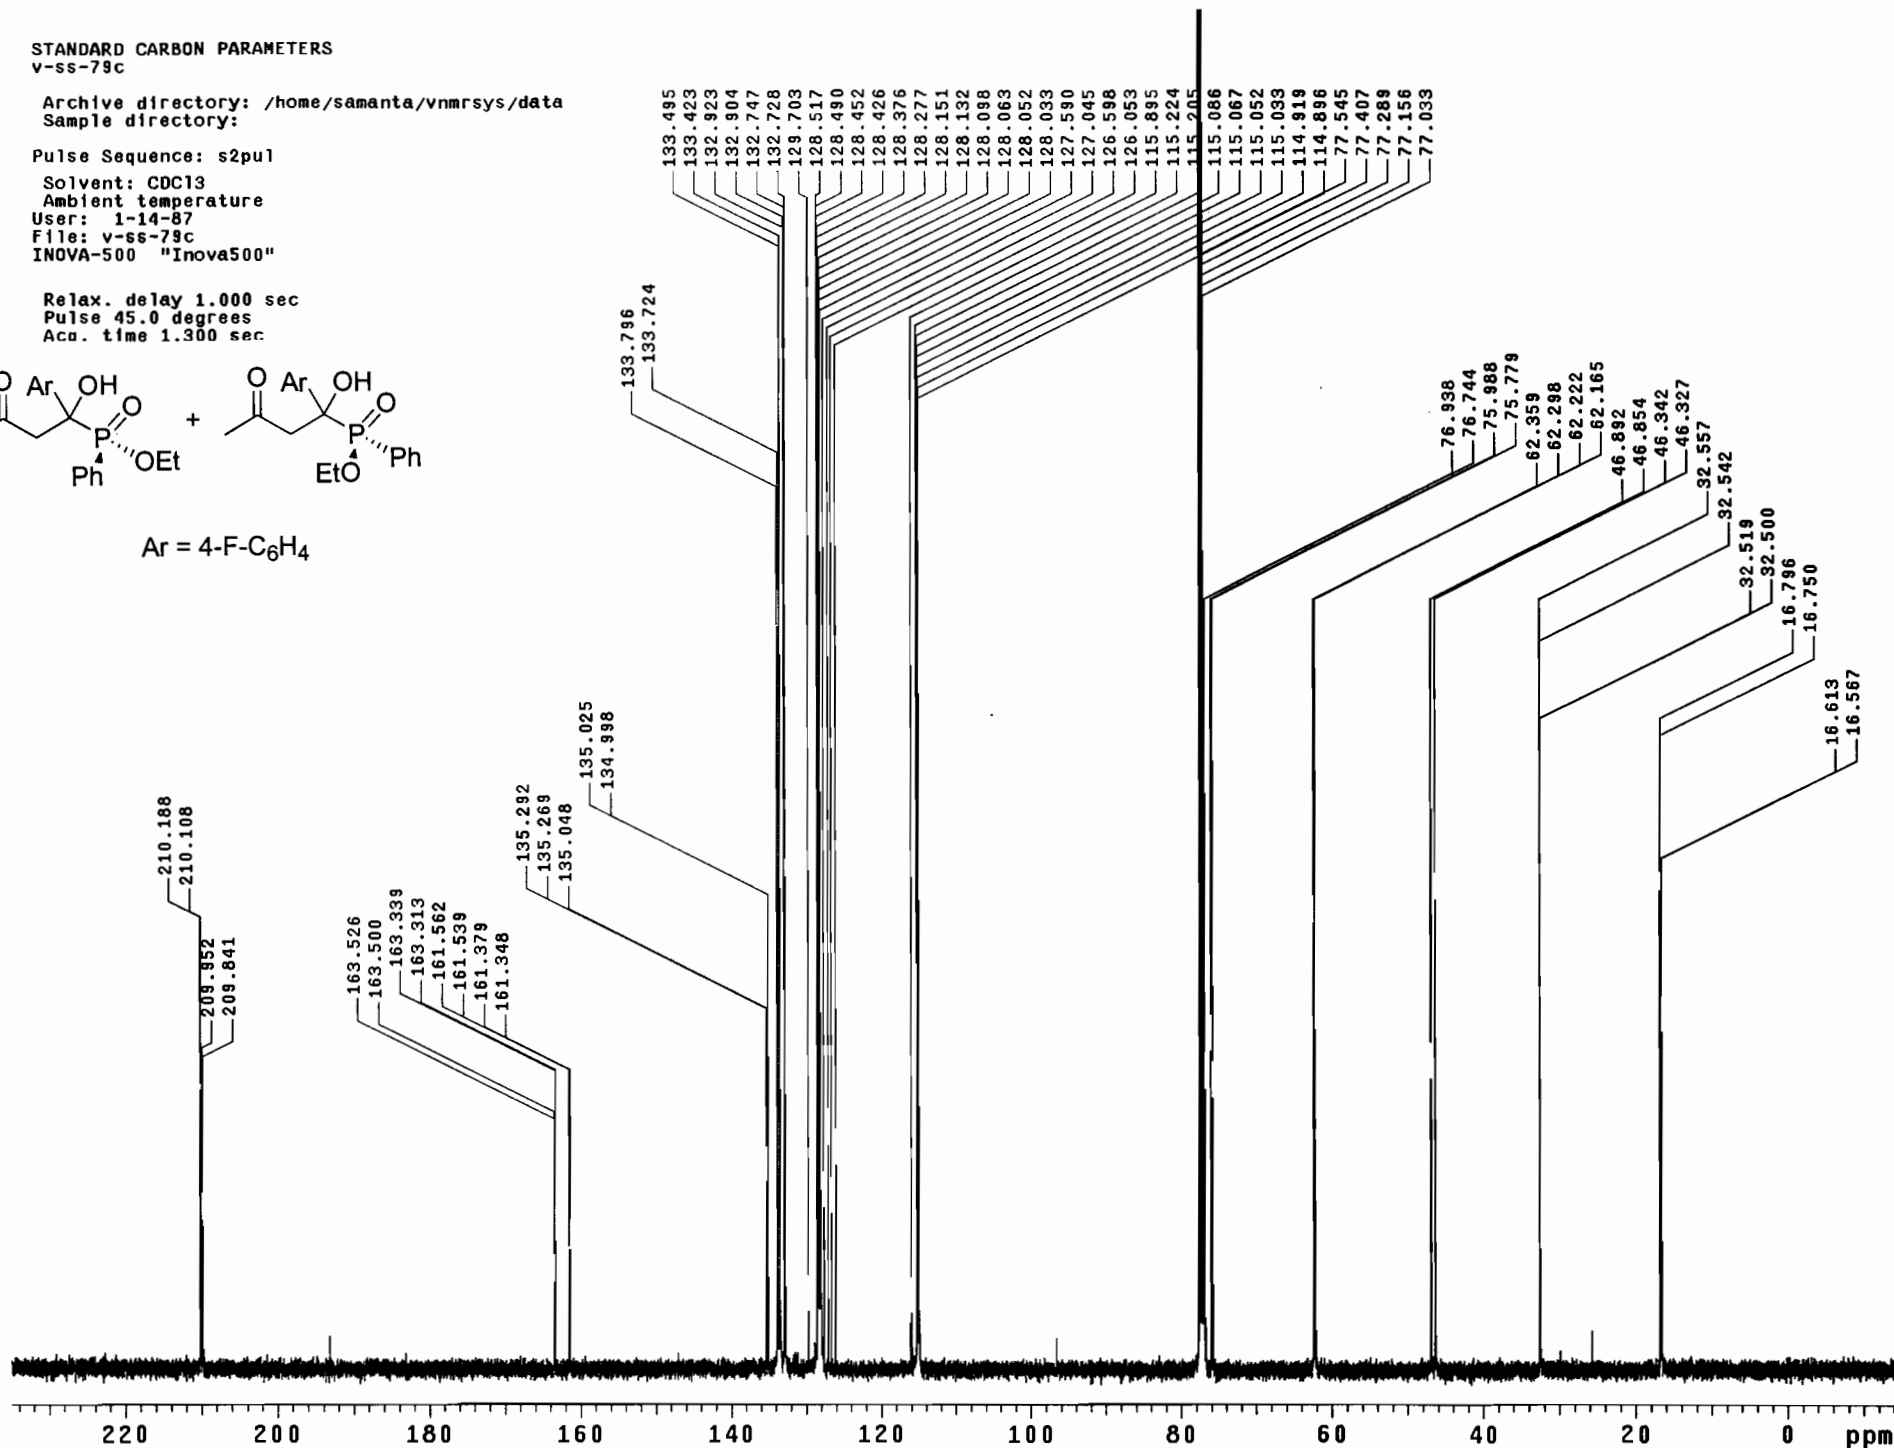

exp3 s2pu1

| SAMPLE              |                | SPECIAL    |          |
|---------------------|----------------|------------|----------|
| date                | Nov 24 2009    | temp       | not used |
| solvent             | D2O            | gain       | not used |
| file                | /export2/home~ | spin       | not used |
| /sperera/3-sp-7P31~ |                | hst        | 0.008    |
| .fid                |                | pw90       | 8.300    |
|                     |                | alfa       | 10.000   |
| ACQUISITION         |                | FLAGS      |          |
| sw                  | 40140.5        |            |          |
| at                  | 1.600          | il         | n        |
| np                  | 128450         | in         | n        |
| fb                  | 22000          | dp         | y        |
| bs                  | 64             | hs         | ny       |
| d1                  | 1.000          | PROCESSING |          |
| nt                  | 100            | lb         | 1.00     |
| ct                  | 100            | fn         | not used |
| TRANSMITTER         |                | DISPLAY    |          |
| tn                  | P31            | sp         | -47.2    |
| sfrq                | 202.254        | wp         | 16241.8  |
| tof                 | 5050.4         | rf1        | 20140.4  |
| tpwr                | 54             | rfp        | 0        |
| pw                  | 3.228          | rp         | 99.7     |
| DECOUPLER           |                | lp         | -1152.0  |
| dn                  | H1             | PLOT       |          |
| dof                 | 0              | wc         | 250      |
| dm                  | yyy            | sc         | 0        |
| dmm                 | w              | vs         | 88       |
| dpwr                | 36             | th         | 45       |
| dmf                 | 10954          | nm         | cdc ph   |

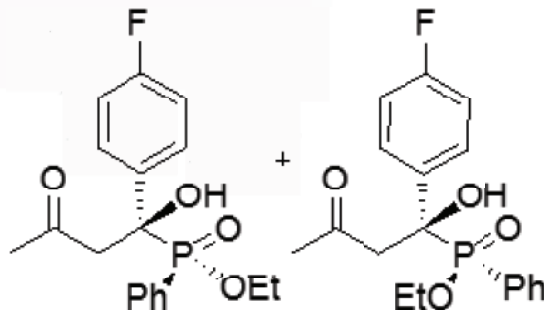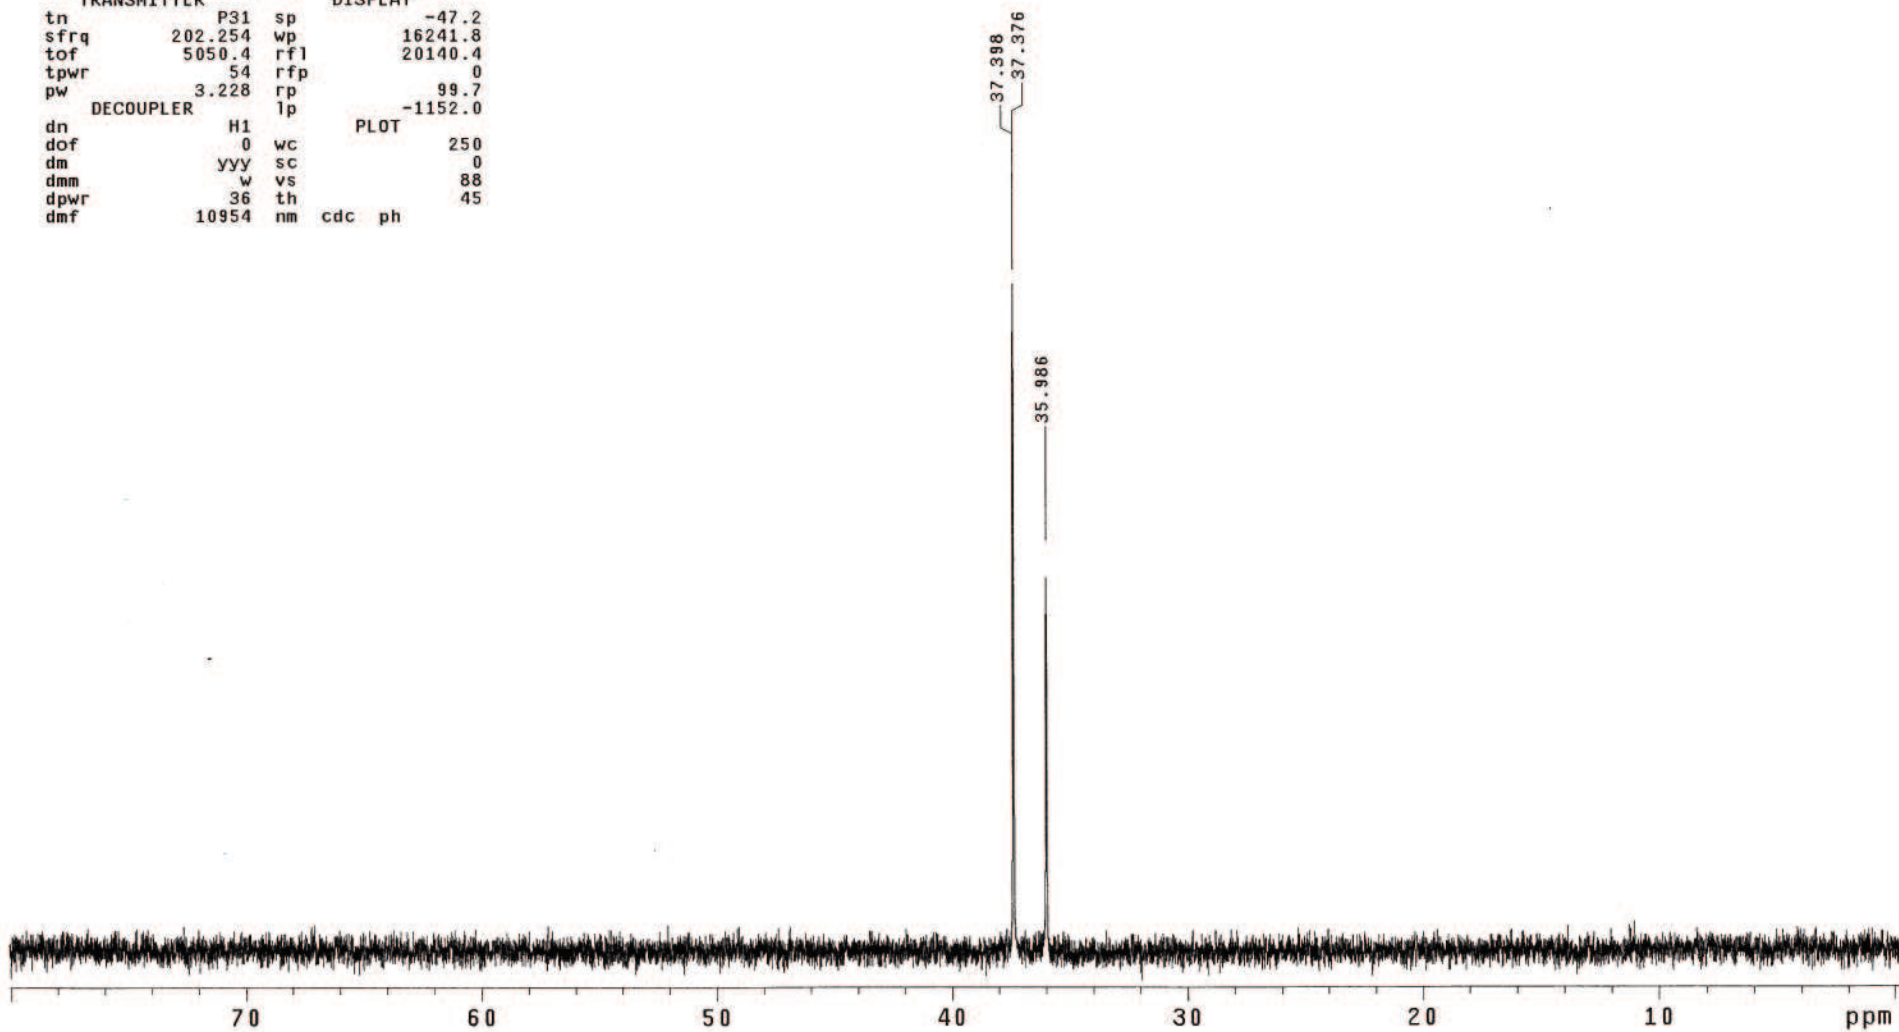

STANDARD PROTON PARAMETERS

Archive directory: /export/home/vnmr1/vnmrsys/data  
 Sample directory:  
 File: PROTON

Pulse Sequence: s2pu1  
 Solvent: CDC13  
 Ambient temperature  
 INOVA-500 "Inova500"

Relax. delay 1.000 sec  
 Pulse 24.5 degrees  
 Acq. time 1.892 sec  
 Width 7995.2 Hz  
 8 repetitions  
 OBSERVE H1, 499.6299995 MHz  
 DATA PROCESSING  
 FT size 32768  
 Total time 0 min, 23 sec

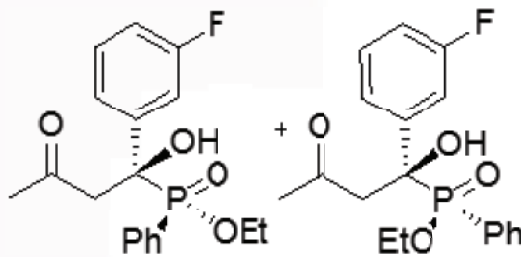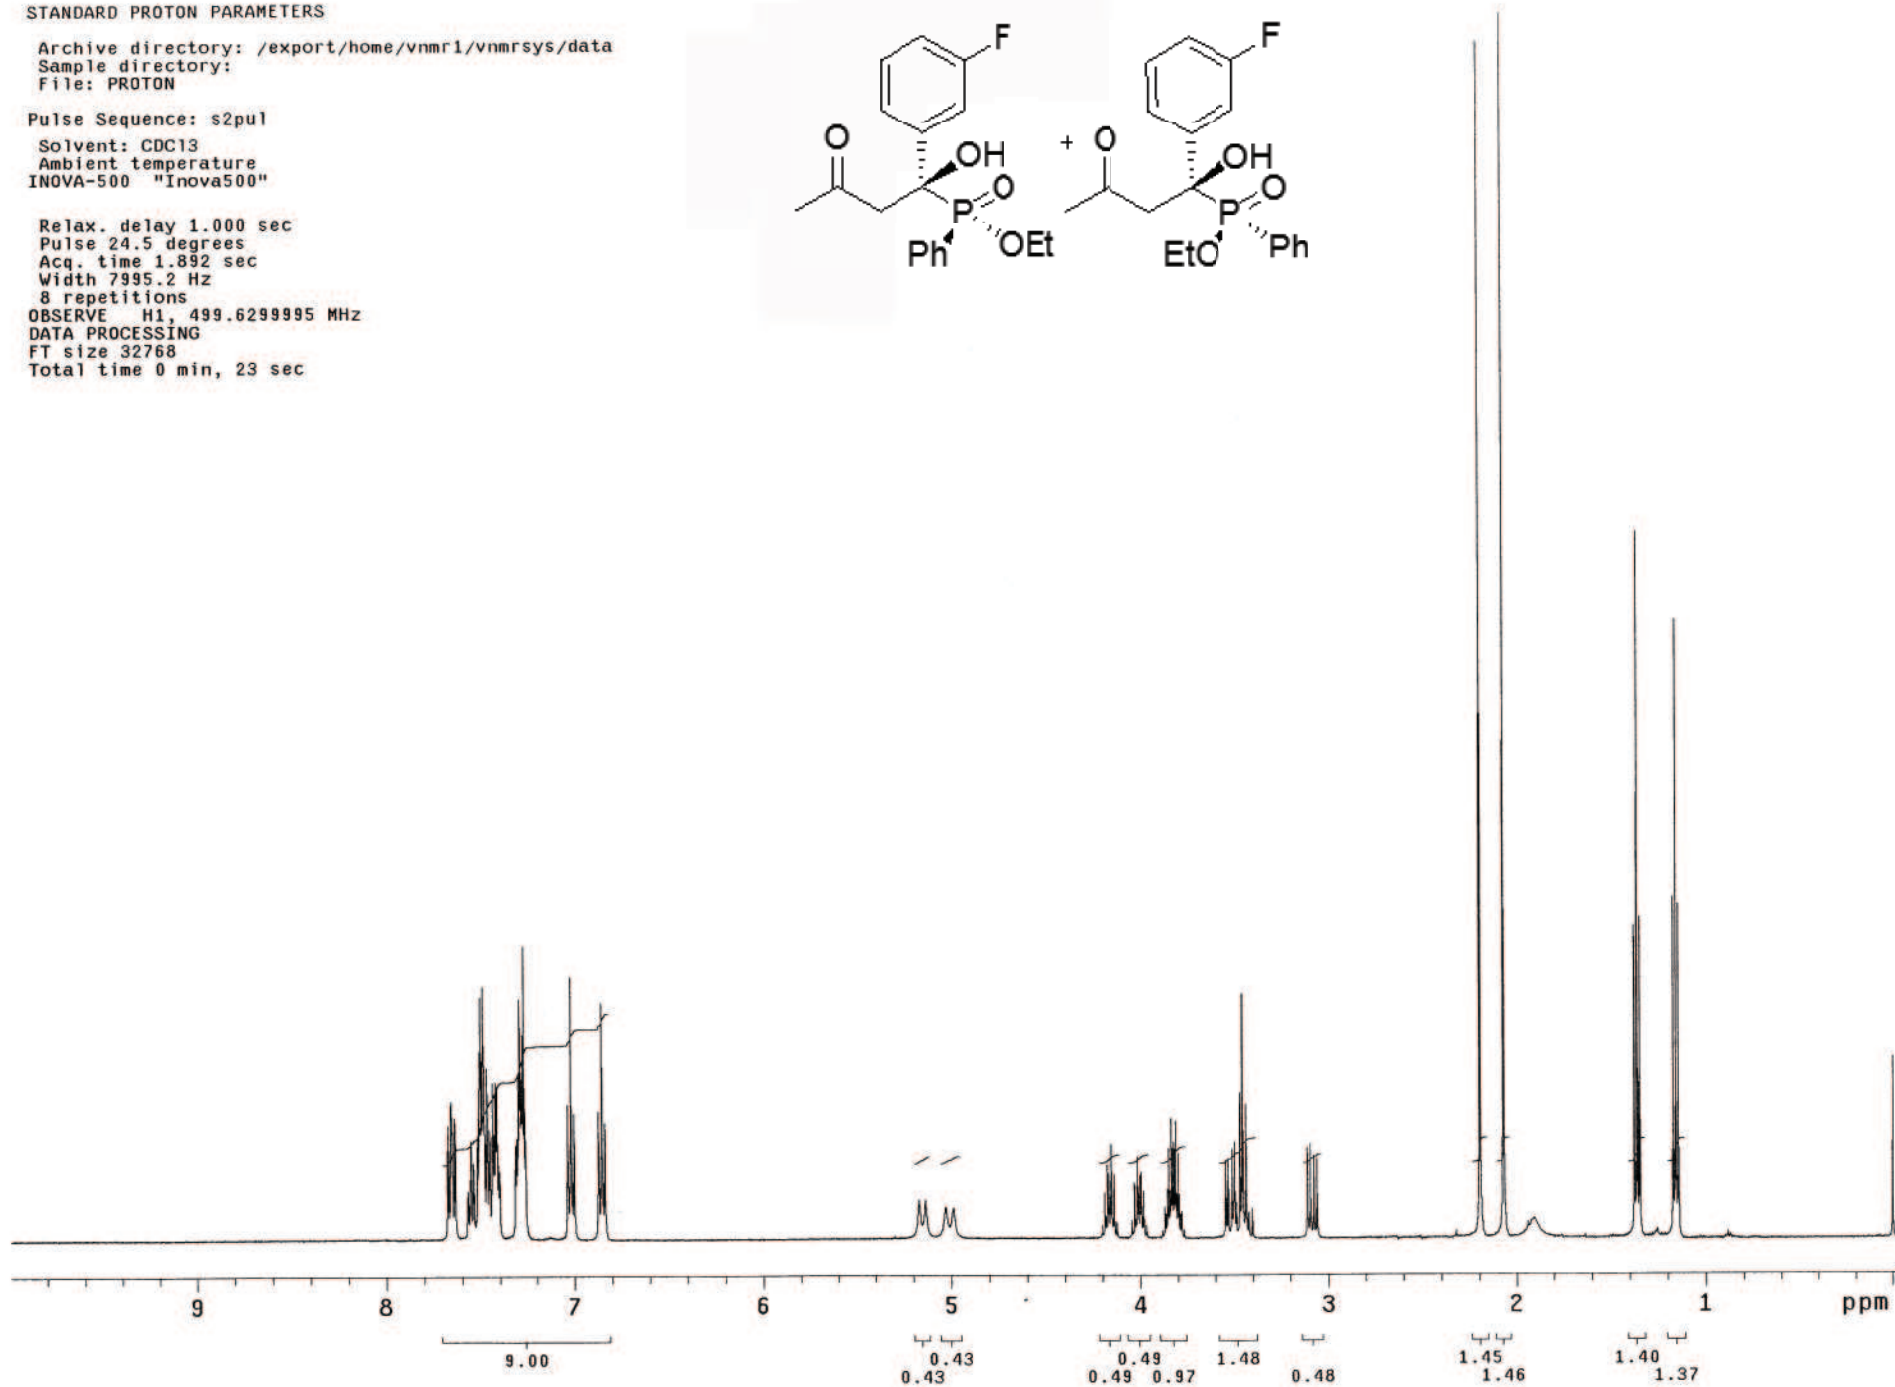

STANDARD CARBON PARAMETERS  
v-ss-138c

Archive directory: /home/samanta/vnmrSYS/data  
Sample directory:

Pulse Sequence: s2pul1

Solvent: CDC13  
Ambient temperature  
User: 1-14-87  
File: v-ss-138c  
INOVA-500 "Inova500"

Relax. delay 1.000 sec  
Pulse 45.0 degrees  
Acq. time 1.300 sec  
Width 31409.5 Hz  
21000 repetitions  
OBSERVE C13, 125.6479222 MHz  
DECOUPLE H1, 499.6956872 MHz  
Power 38 dB  
continuously on  
WALTZ-16 modulated  
DATA PROCESSING  
Line broadening 0.5 Hz  
FT size 131072  
Total time 13 hr, 28 min, 16 sec

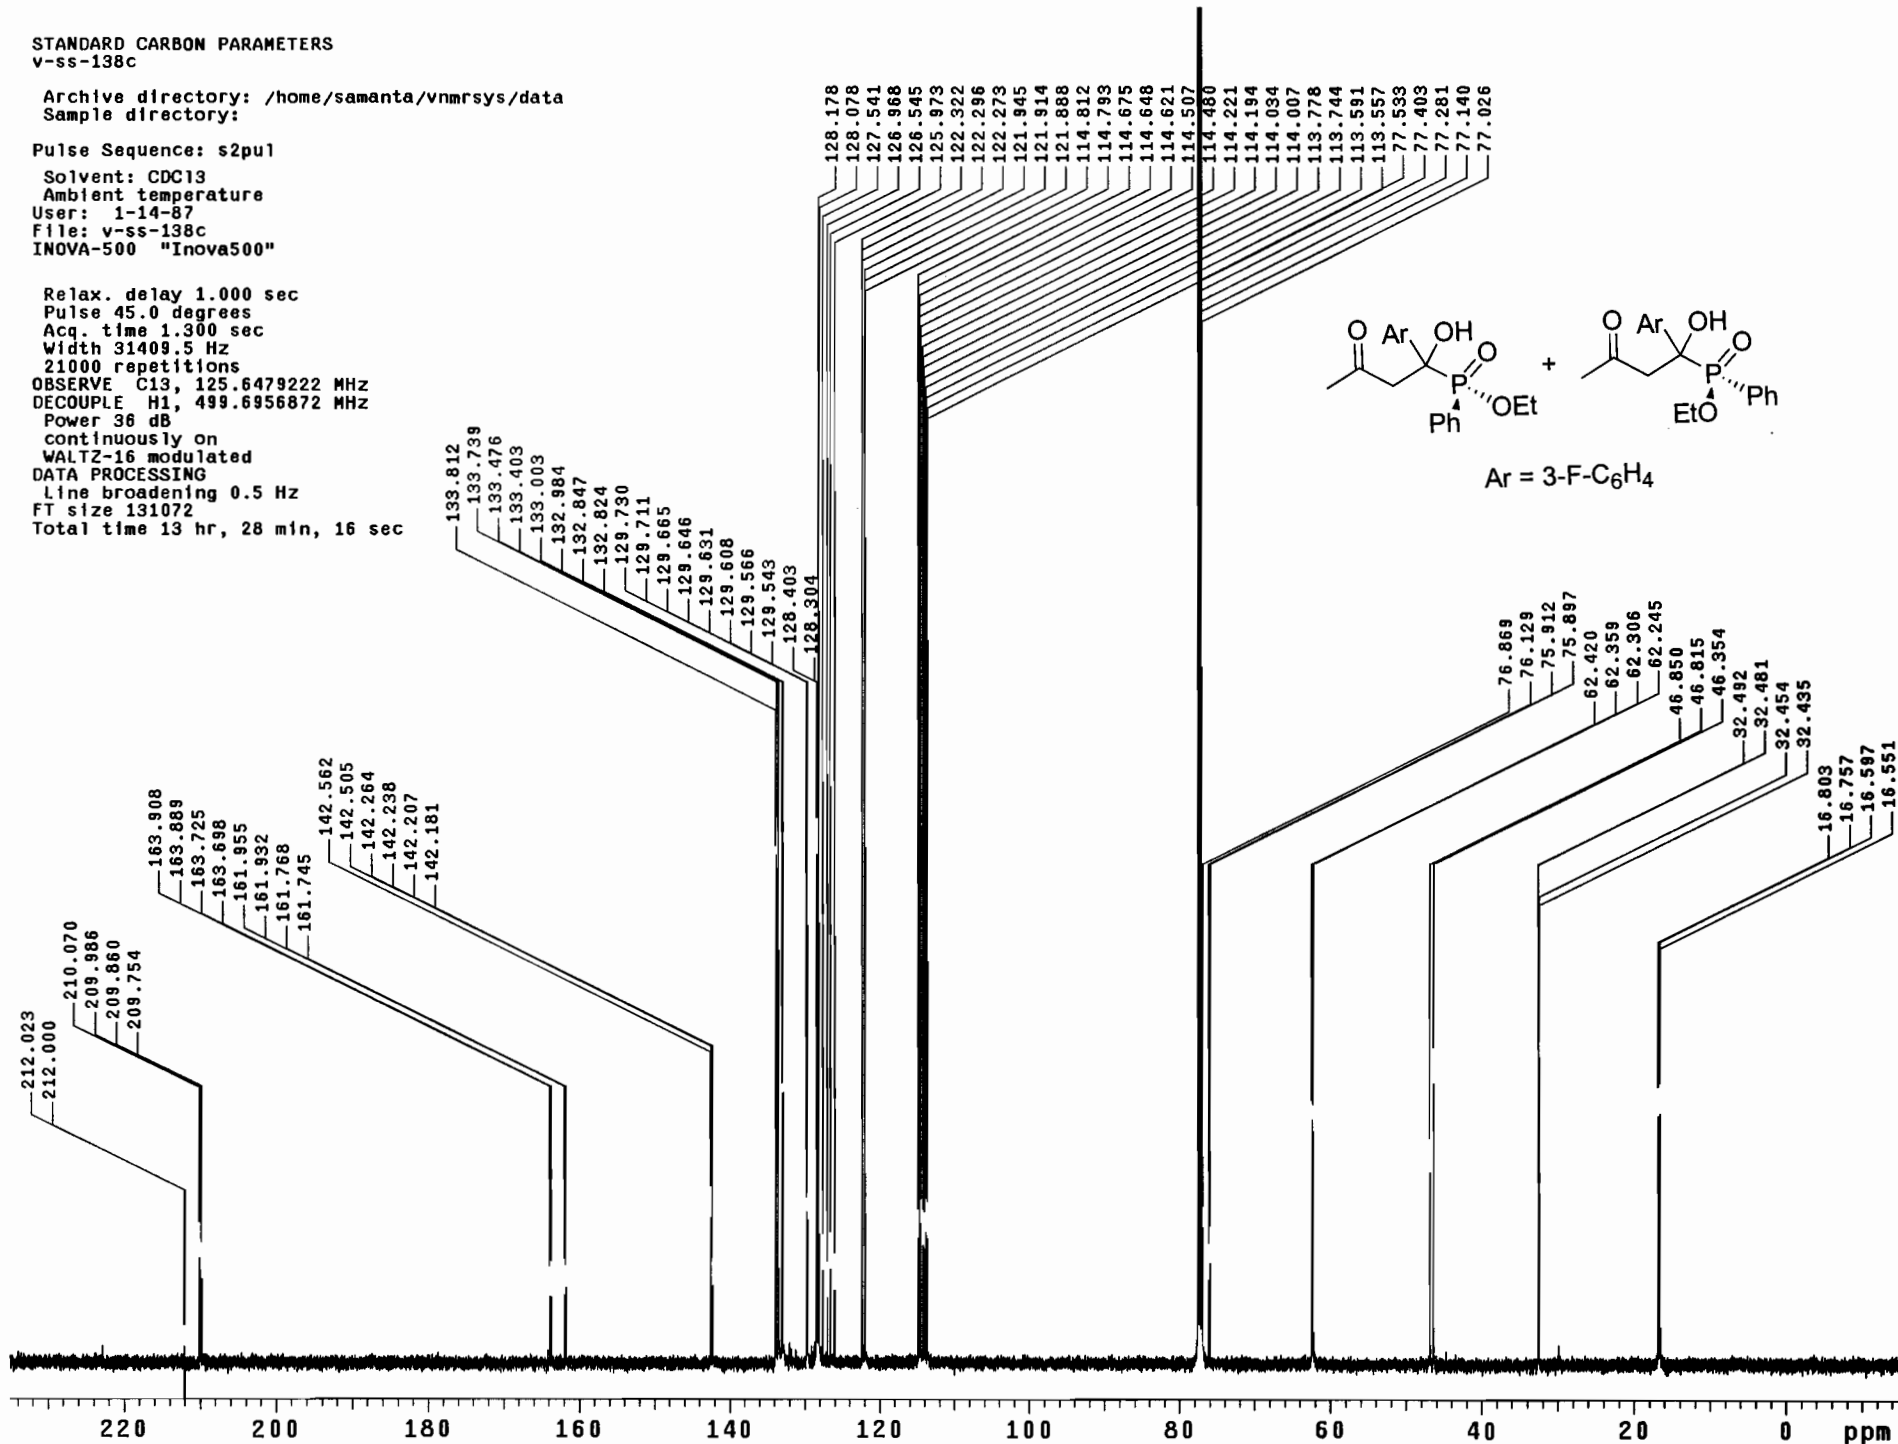

exp1 s2pu1

```
SAMPLE          DEC. & VT
date    Dec 30 2009  dfrq    499.632
solvent  CDC13      dn      H1
file     exp       dpwr    36
ACQUISITION
sfrq    202.258    dm      nny
tn      P31       dmm     w
at      1.600     dmf    10954
np      64000     dseq
sw      20000.0   dres   1.0
fb      11000    homo   n
tpwr    54       temp   26.0
pw      4.0      PROCESSING
d1      5.000    lb     1.00
tof     9000.0   wtfile
nt      16      proc
ct      16      fn     not used
alock   n       math   f
gain    not used
FLAGS
il      n       werr
in      n       wexp
dp      y       wbs
hs      ny      wnt
DISPLAY
sp      -427.9
wp      10578.9
vs      42
sc      0
wc      250
hzmm    42.32
is      500.00
rfl     6186.7
rfp     0
th      37
ins     100.000
nm      cdc ph
```

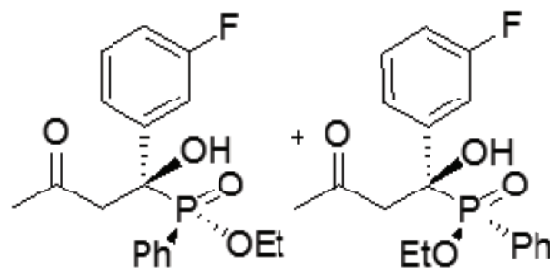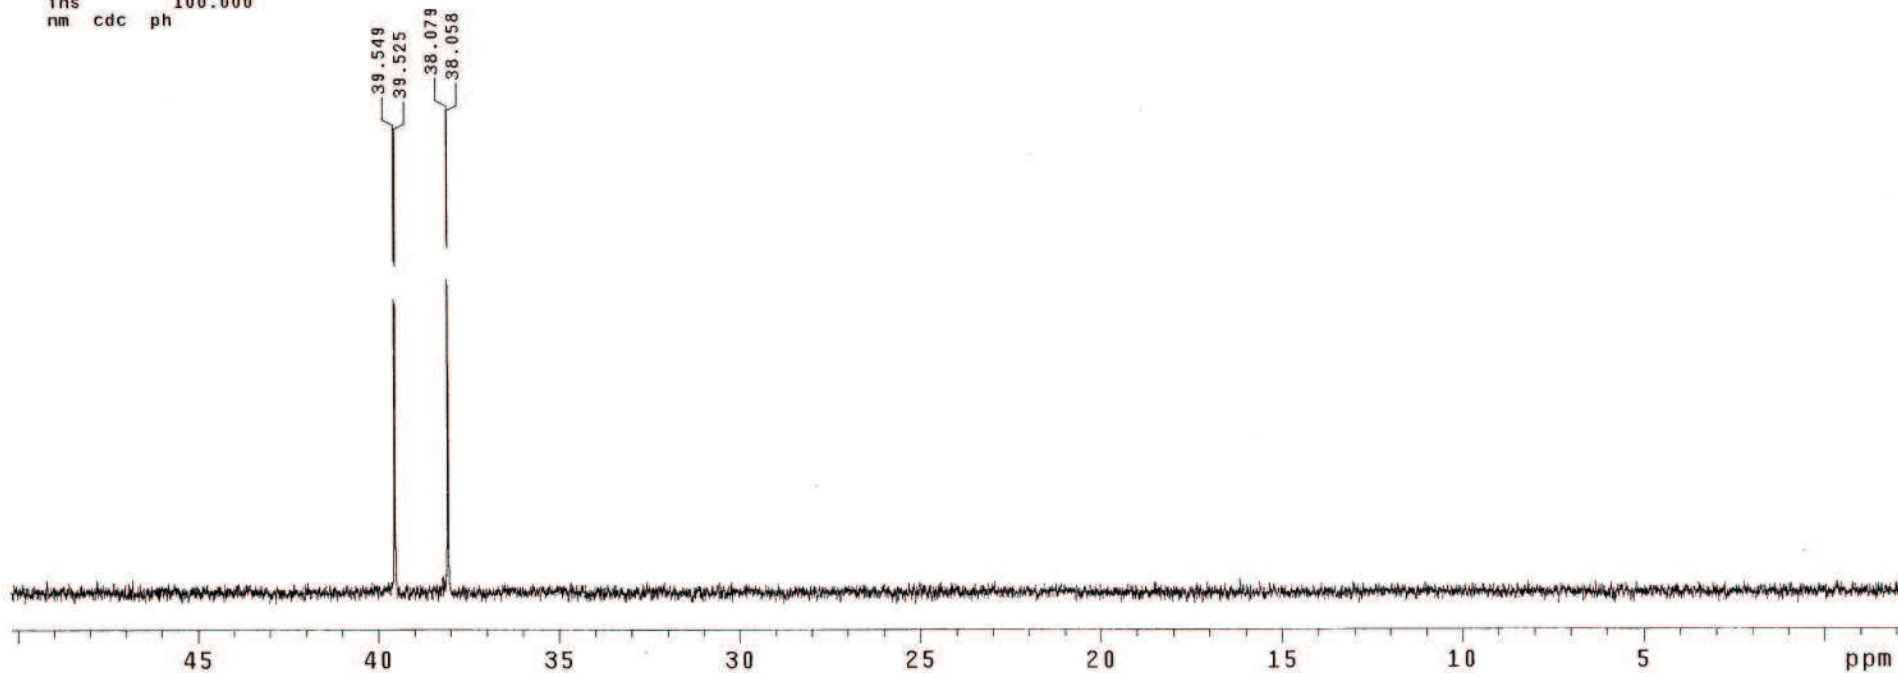

Archive directory: /export/home/vnmr1/vnmr/sys/data  
Sample directory:  
File: PROTON

Pulse Sequence: s2pu1  
Solvent: CDCl3  
Ambient temperature  
INOVA-500 "Inova500"

Relax. delay 1.000 sec  
Pulse 24.5 degrees  
Acq. time 1.892 sec  
Width 7995.2 Hz  
8 repetitions  
OBSERVE H1, 499.6299995 MHz  
DATA PROCESSING  
FT size 32768  
Total time 0 min, 23 sec

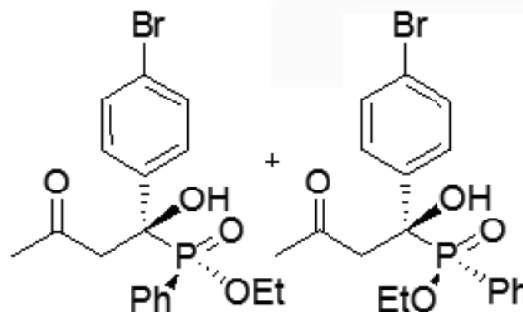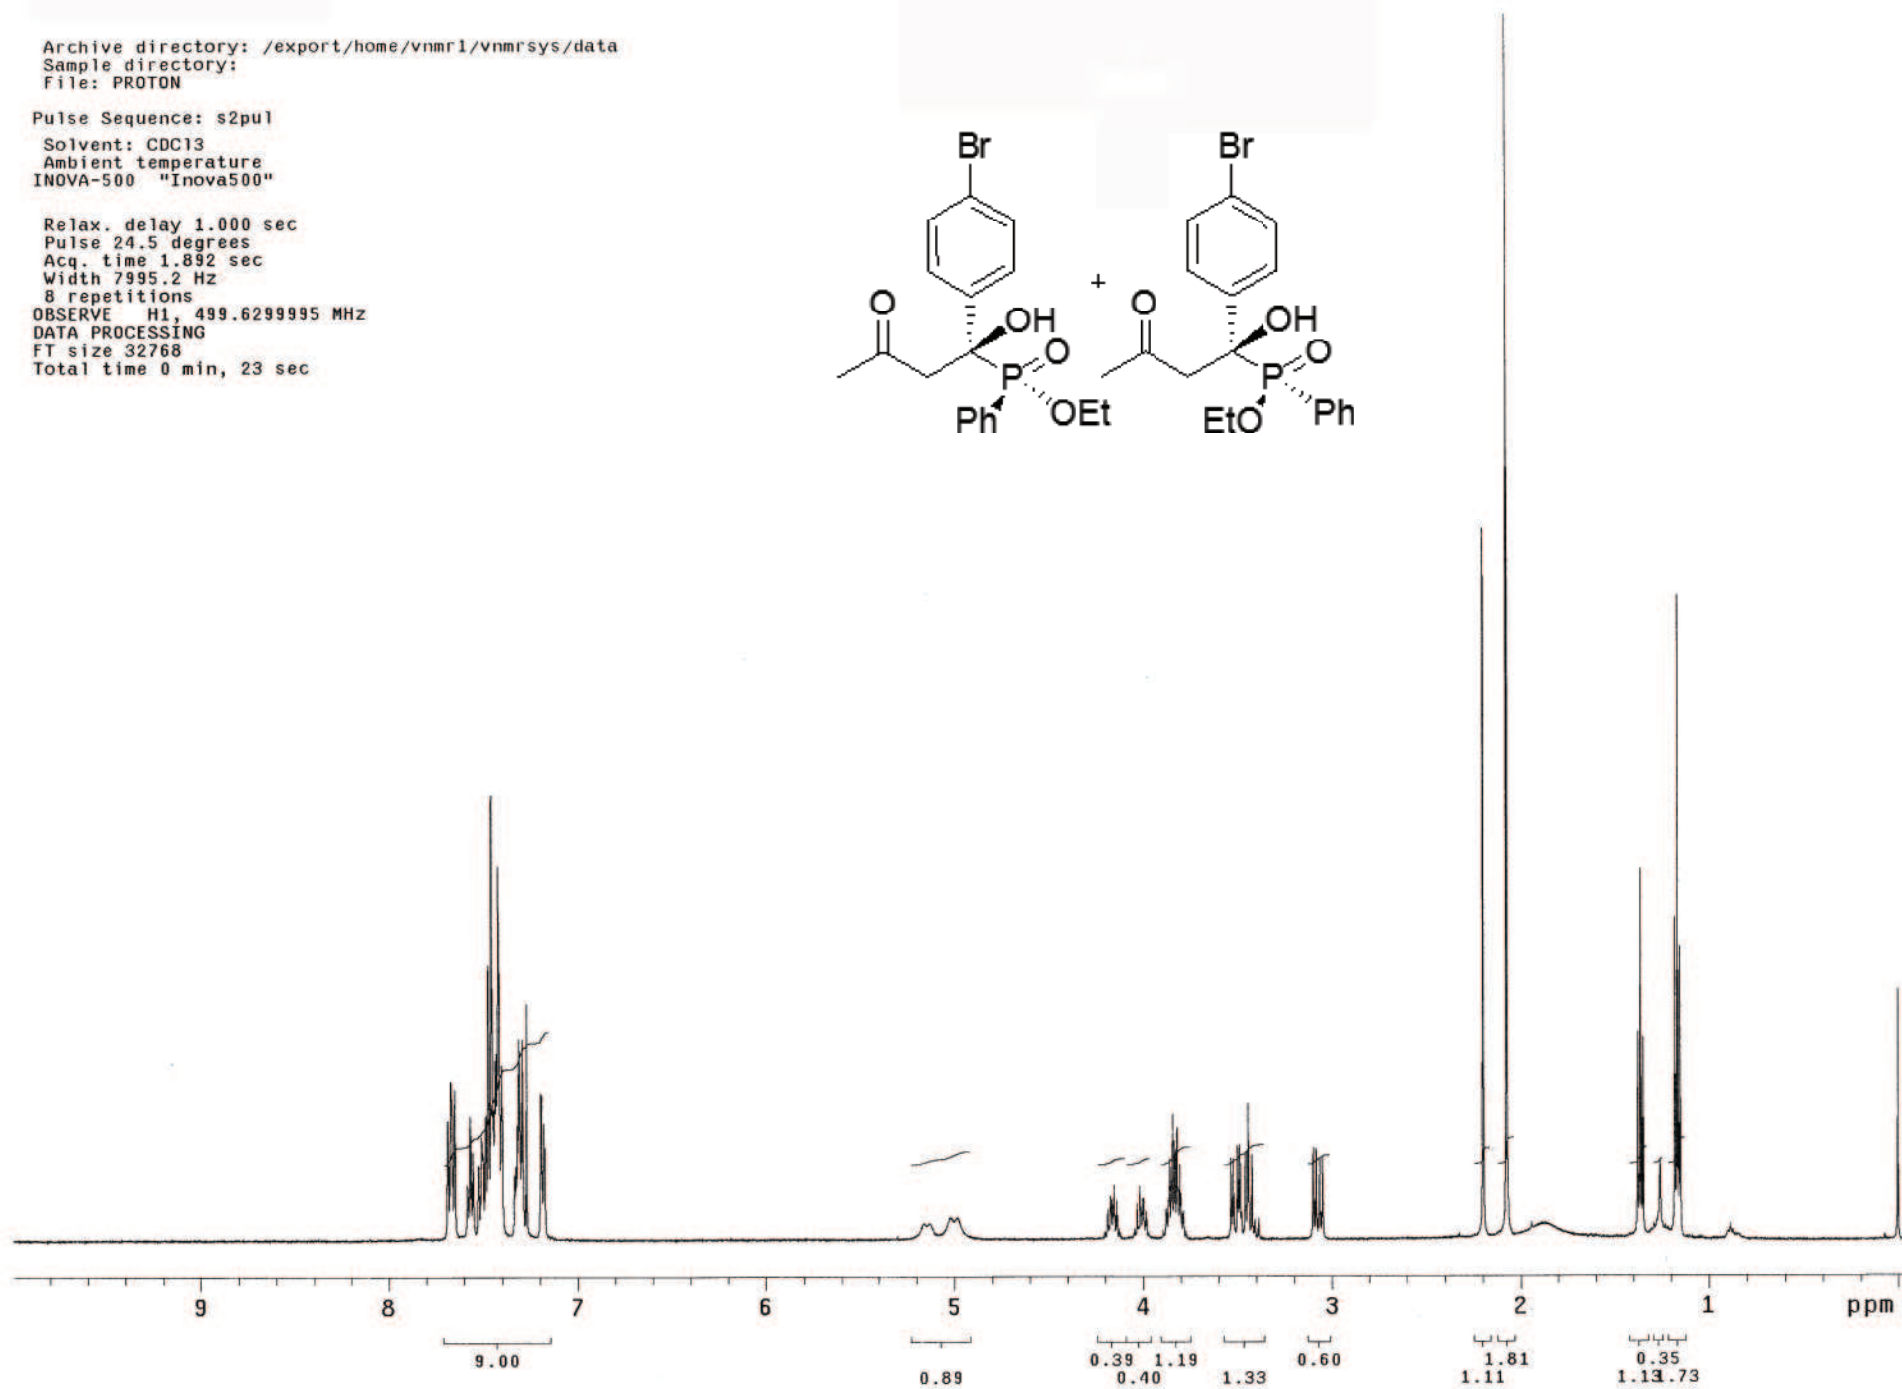

STANDARD CARBON PARAMETERS  
v-ss-99c

Archive directory: /home/samanta/vnmrSYS/data  
Sample directory:

Pulse Sequence: s2pul

Solvent: CDC13  
Ambient temperature  
User: 1-14-87  
File: v-ss-99c  
INOVA-500 "Inova500"

Relax. delay 1.000 sec  
Pulse 45.0 degrees  
Acq. time 1.300 sec  
Width 31409.5 Hz  
22000 repetitions  
OBSERVE C13, 125.6479222 MHz  
DECOUPLE H1, 499.6956872 MHz  
Power 36 dB  
continuously on  
WALTZ-16 modulated  
DATA PROCESSING  
Line broadening 0.5 Hz  
FT size 131072  
Total time 14 hr, 6 min, 46 sec

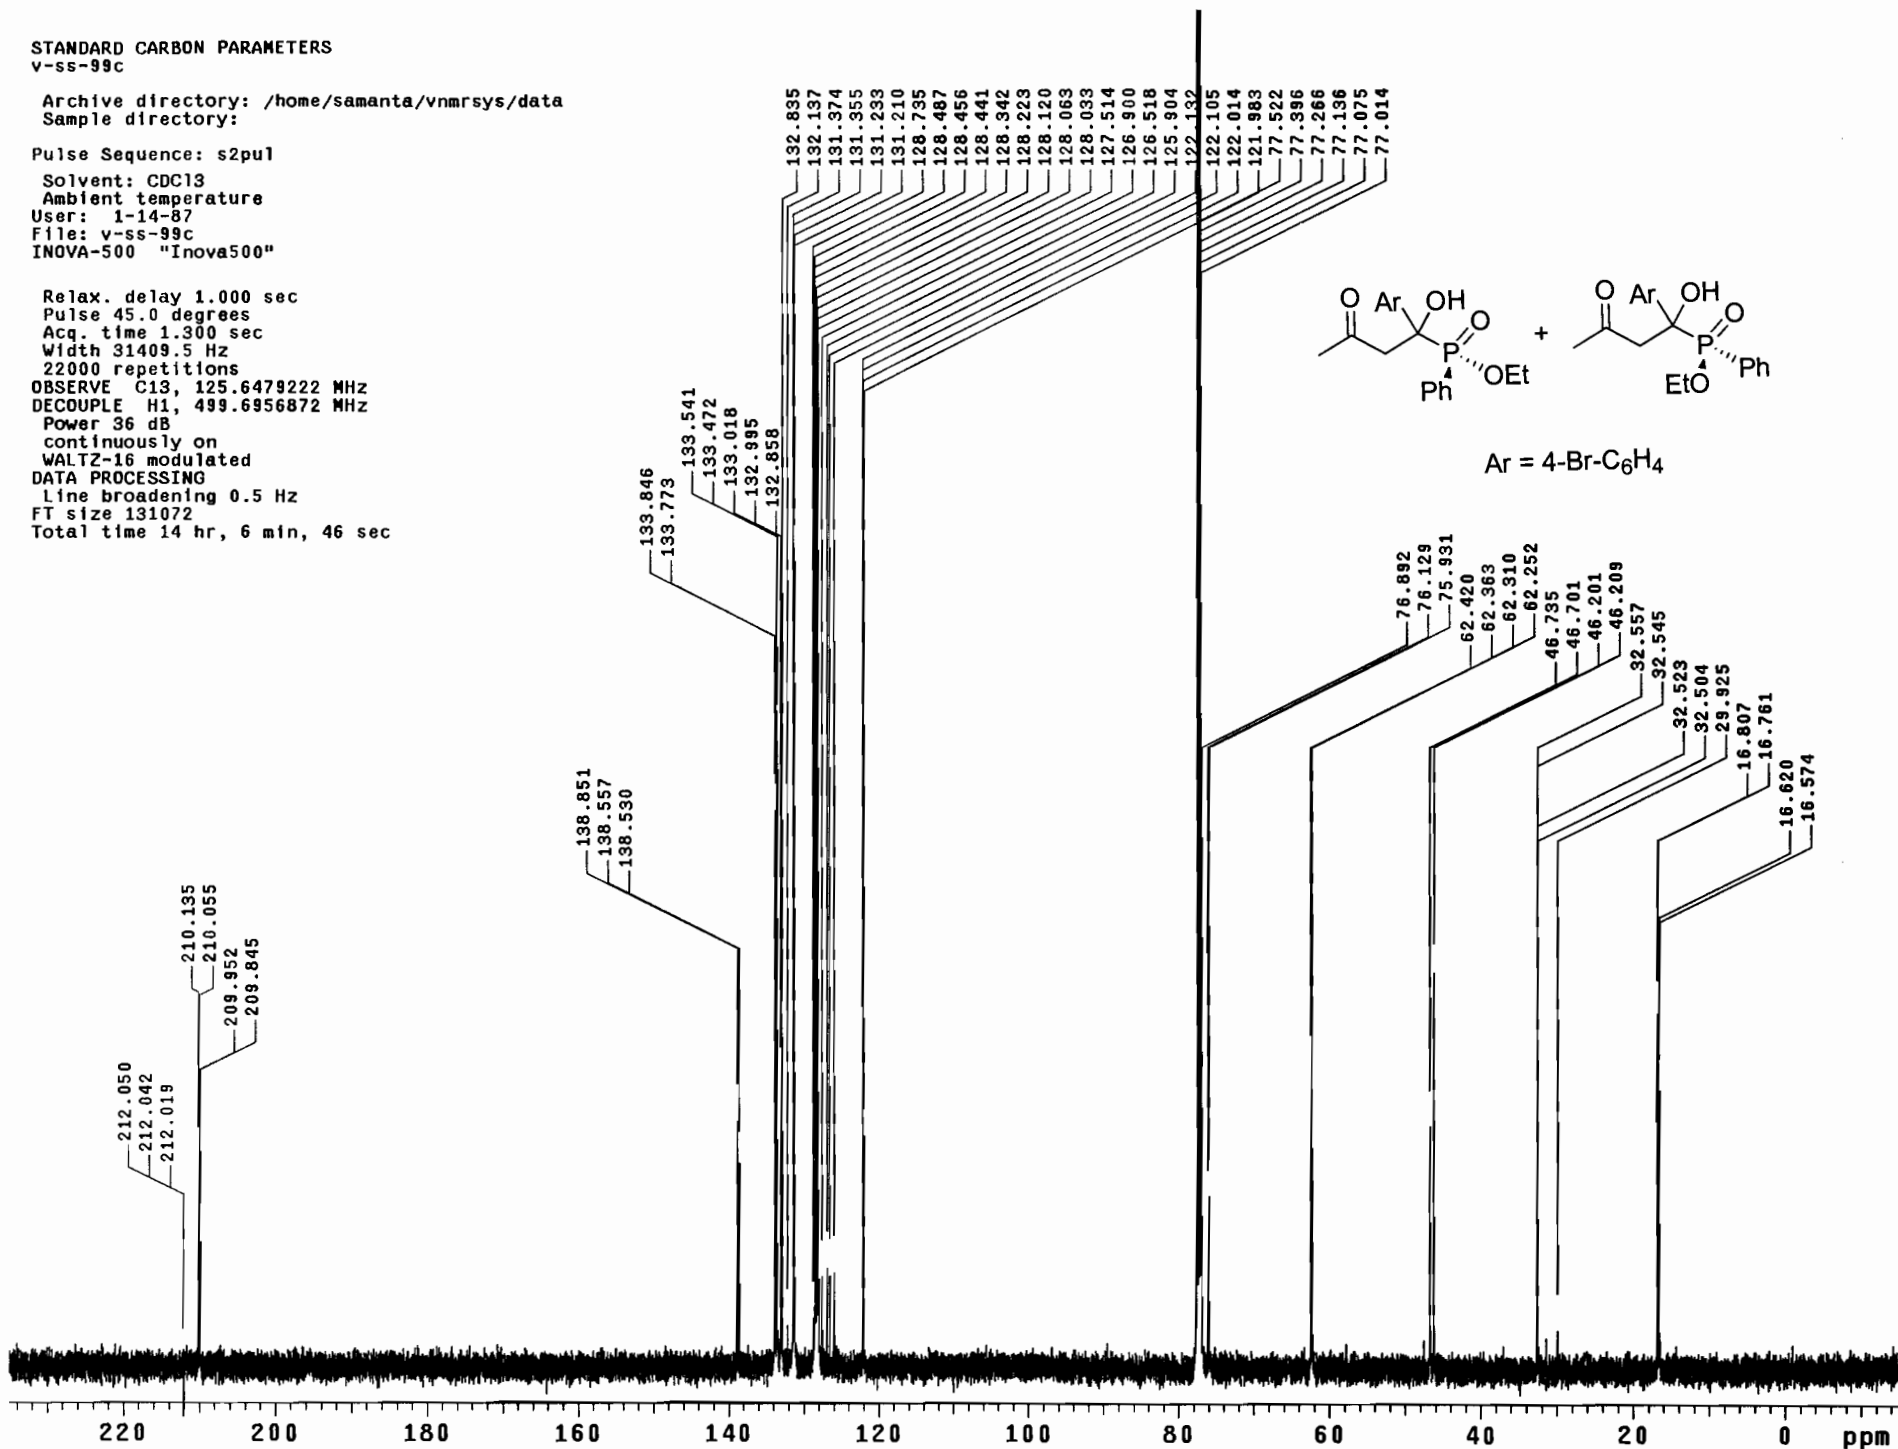



exp1 s2pu1

```
SAMPLE          DEC. & VT
date   Dec 30 2009  dfrq      499.632
solvent CDC13      dn        H1
file    exp        dpwr      36
          ACQUISITION  dof        0
sfrq    202.258    dm         nny
tn       P31       dmm        w
at       1.600     dmf       10954
np       64000     dseq
sw       20000.0   dres      1.0
fb       11000    homo      n
tpwr     54        temp     26.0
pw       4.0      PROCESSING
d1       5.000     lb        1.00
tof      9000.0   wtfile
nt       16       proc
ct       16       fn        not used
alock    not used math
gain     not used
          FLAGS    werr
il       n        wexp
in       n        wbs
dp       y        wnt
hs       ny
          DISPLAY
sp      -427.9
wp      10578.9
vs       63
sc       0
wc       250
h2mm    42.32
is       500.00
rfl     6186.7
rfp     0
th       22
ins     100.000
nm      cdc  ph
```

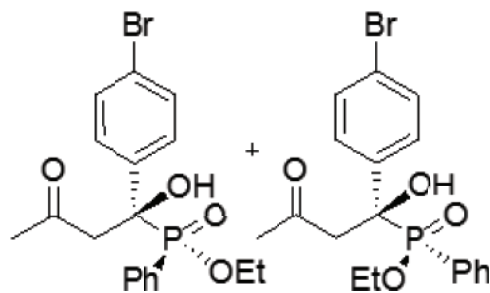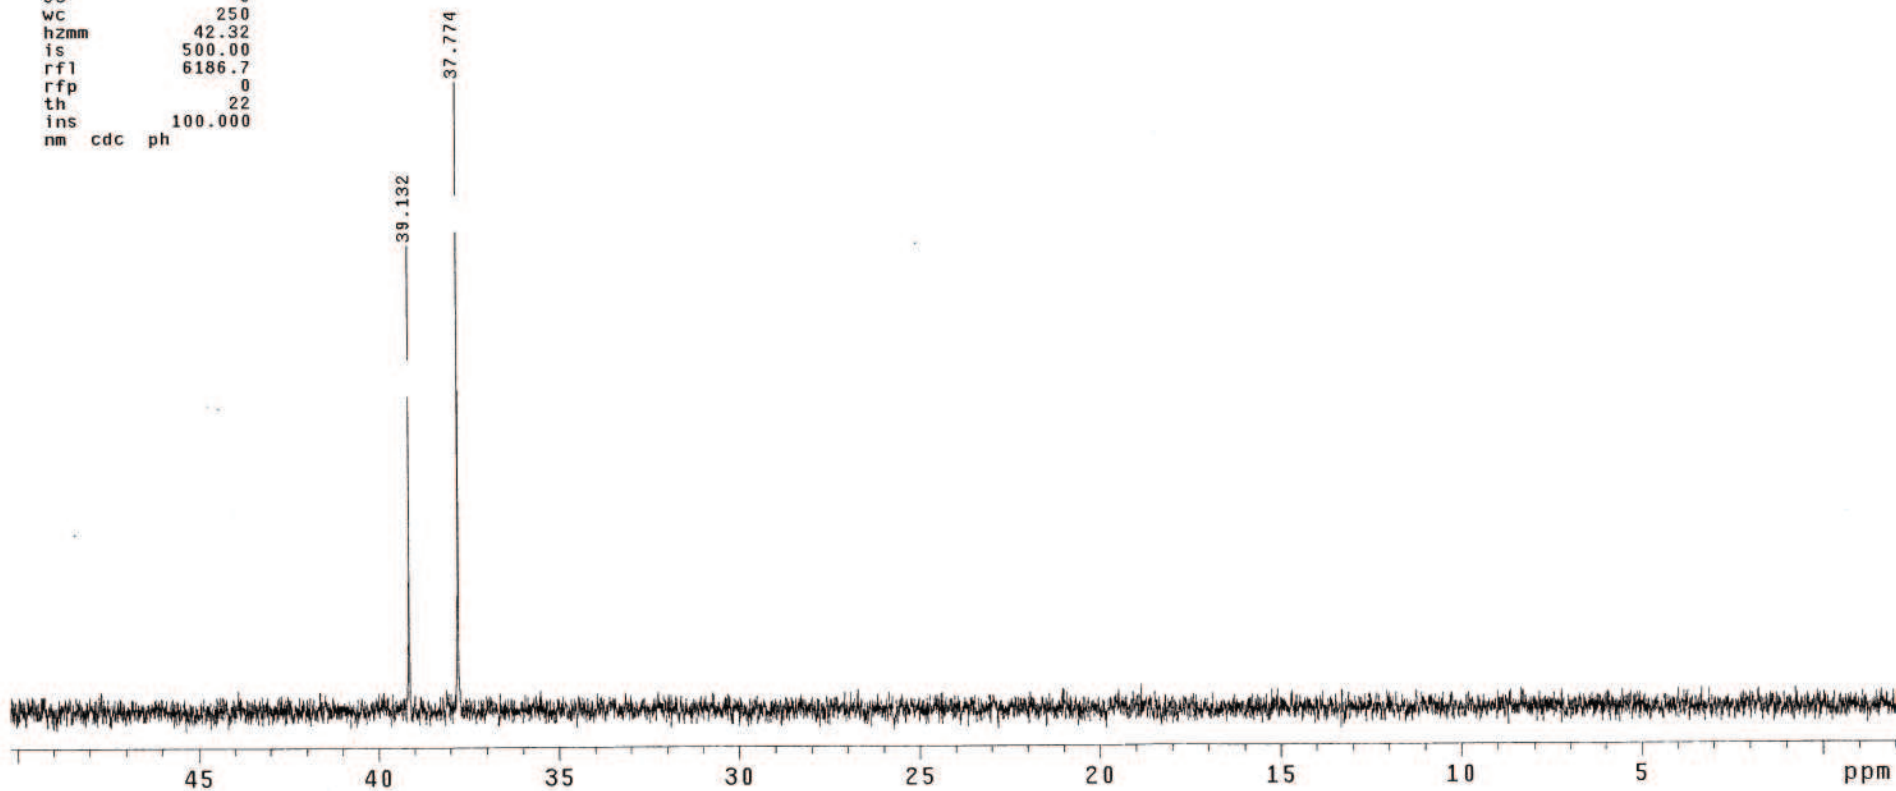

Archive directory: /export/home/vnmr1/vnmrsys/data  
Sample directory:  
File: PROTON

Pulse Sequence: s2pu1

Solvent: CDCl3  
Ambient temperature  
INOVA-500 "Inova500"

Relax. delay 1.000 sec  
Pulse 24.5 degrees  
Acq. time 1.892 sec  
Width 7995.2 Hz  
4 repetitions  
OBSERVE H1, 499.6299995 MHz  
DATA PROCESSING  
FT size 32768  
Total time 0 min, 11 sec

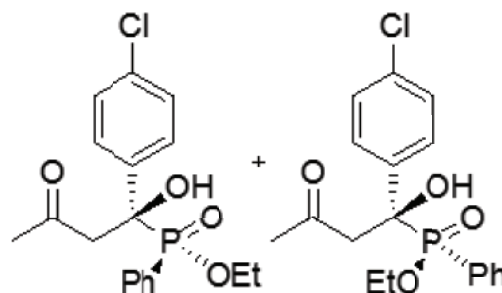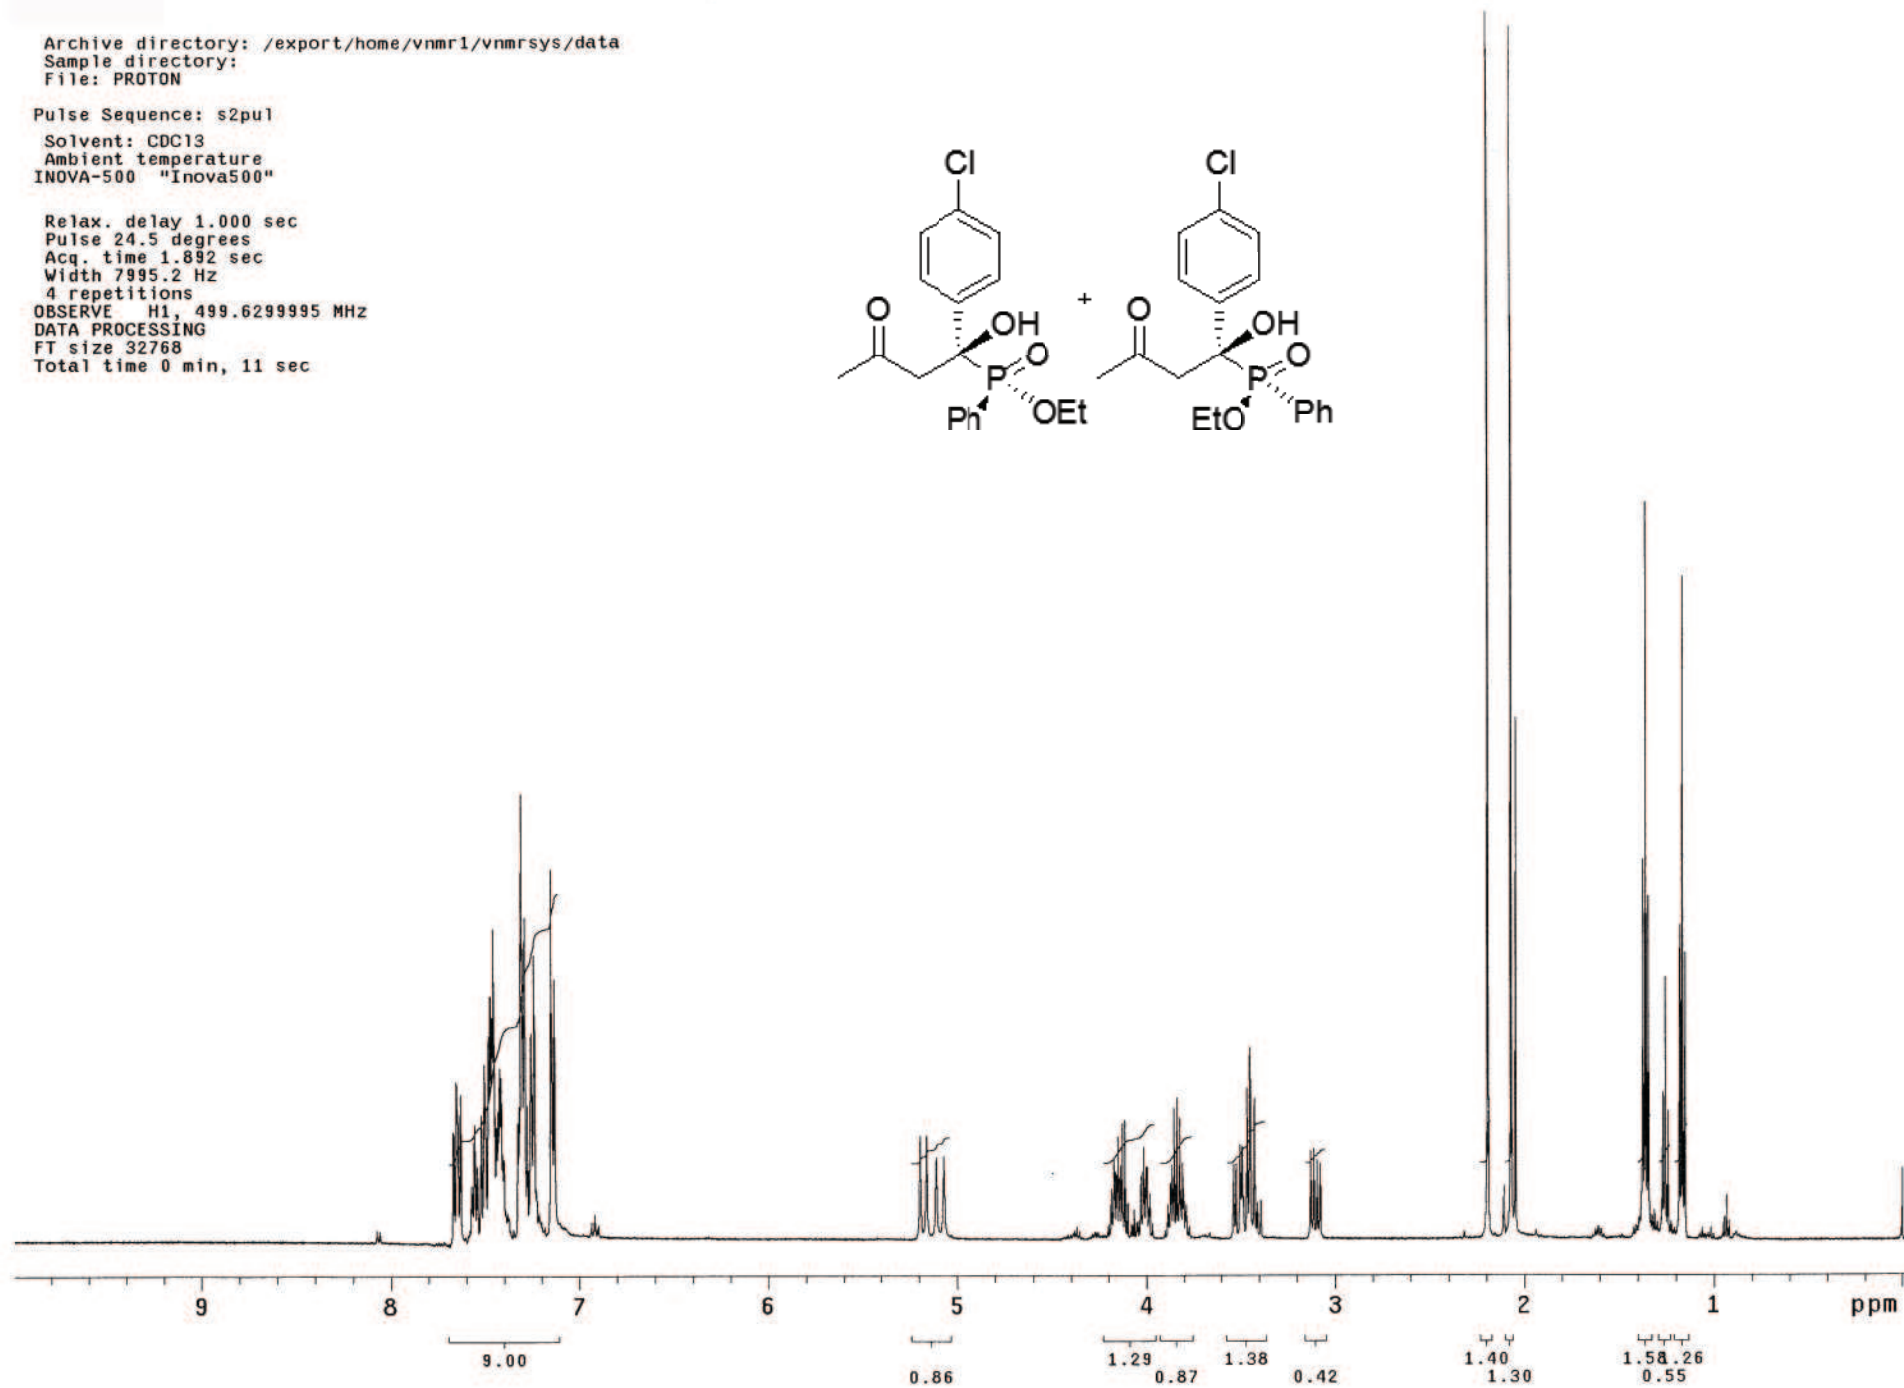

STANDARD CARBON PARAMETERS  
v-ss-86c

Archive directory: /home/samanta/vnmrsys/data  
Sample directory:

Pulse Sequence: s2pu1

Solvent: CDC13  
Ambient temperature  
User: 1-14-87  
File: v-ss-86c  
INOVA-500 "Inova500"

Relax. delay 1.000 sec  
Pulse 45.0 degrees  
Acq. time 1.300 sec  
Width 31409.5 Hz  
3712 repetitions  
OBSERVE C13, 125.6479222 MHz  
DECOUPLE H1, 499.6956872 MHz  
Power 36 dB  
continuously on  
WALTZ-16 modulated  
DATA PROCESSING  
Line broadening 0.5 Hz  
FT size 131072  
Total time 2 hr, 33 min, 57 sec

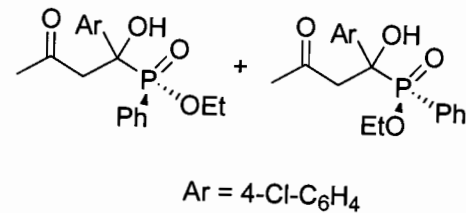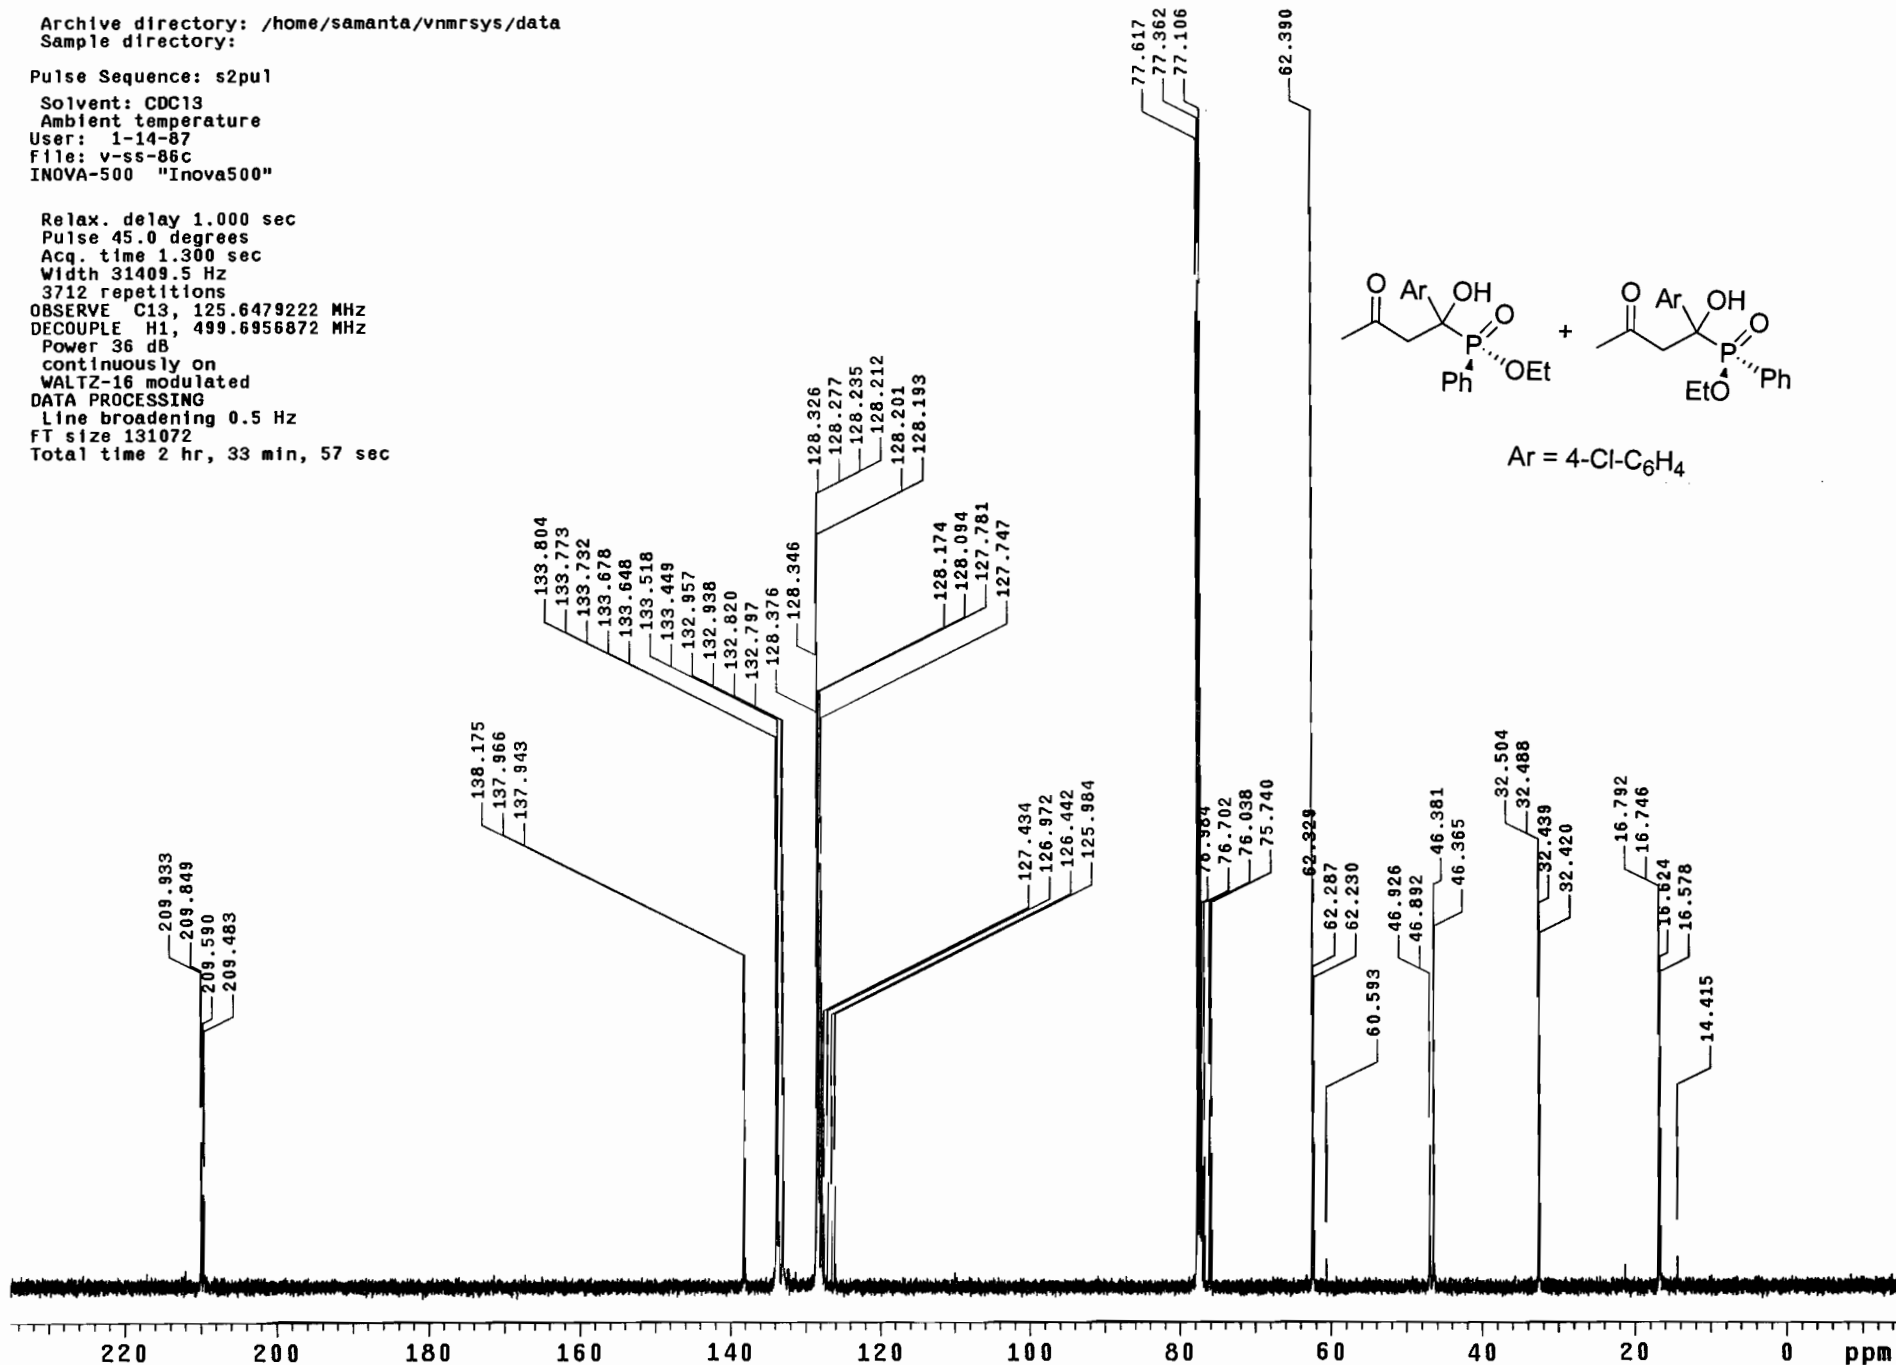

exp1 s2pu1

| SAMPLE      |             | DEC. & VT  |          |
|-------------|-------------|------------|----------|
| date        | Dec 30 2009 | dfrq       | 499.632  |
| solvent     | CDC13       | dn         | H1       |
| file        | exp         | dpwr       | 36       |
| ACQUISITION |             | DOF        |          |
| sfrq        | 202.258     | dm         | nny      |
| tn          | P31         | dmm        | w        |
| at          | 1.600       | dmf        | 10954    |
| np          | 64000       | dseq       |          |
| sw          | 20000.0     | dres       | 1.0      |
| fb          | 11000       | homo       | n        |
| tpwr        | 54          | temp       | 26.0     |
| pw          | 4.0         | PROCESSING |          |
| d1          | 5.000       | lb         | 1.00     |
| tof         | 9000.0      | wtfile     |          |
| nt          | 16          | proc       | ft       |
| ct          | 16          | fn         | not used |
| alock       | n           | math       | f        |
| gain        | not used    |            |          |
| FLAGS       |             | werr       |          |
| il          | n           | wexp       |          |
| in          | n           | wbs        |          |
| dp          | y           | wnt        |          |
| hs          | ny          |            |          |
| DISPLAY     |             |            |          |
| sp          | -427.9      |            |          |
| wp          | 10578.9     |            |          |
| vs          | 68          |            |          |
| sc          | 0           |            |          |
| wc          | 250         |            |          |
| hzmm        | 42.32       |            |          |
| is          | 500.00      |            |          |
| rfl         | 6186.7      |            |          |
| rfp         | 0           |            |          |
| th          | 25          |            |          |
| ins         | 100.000     |            |          |
| nm          | cdc ph      |            |          |

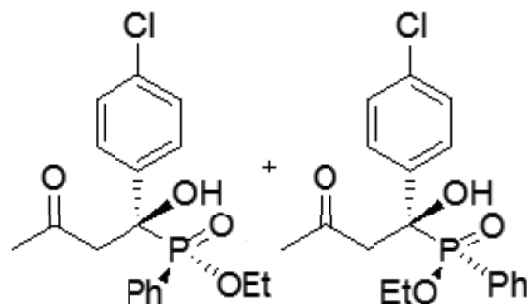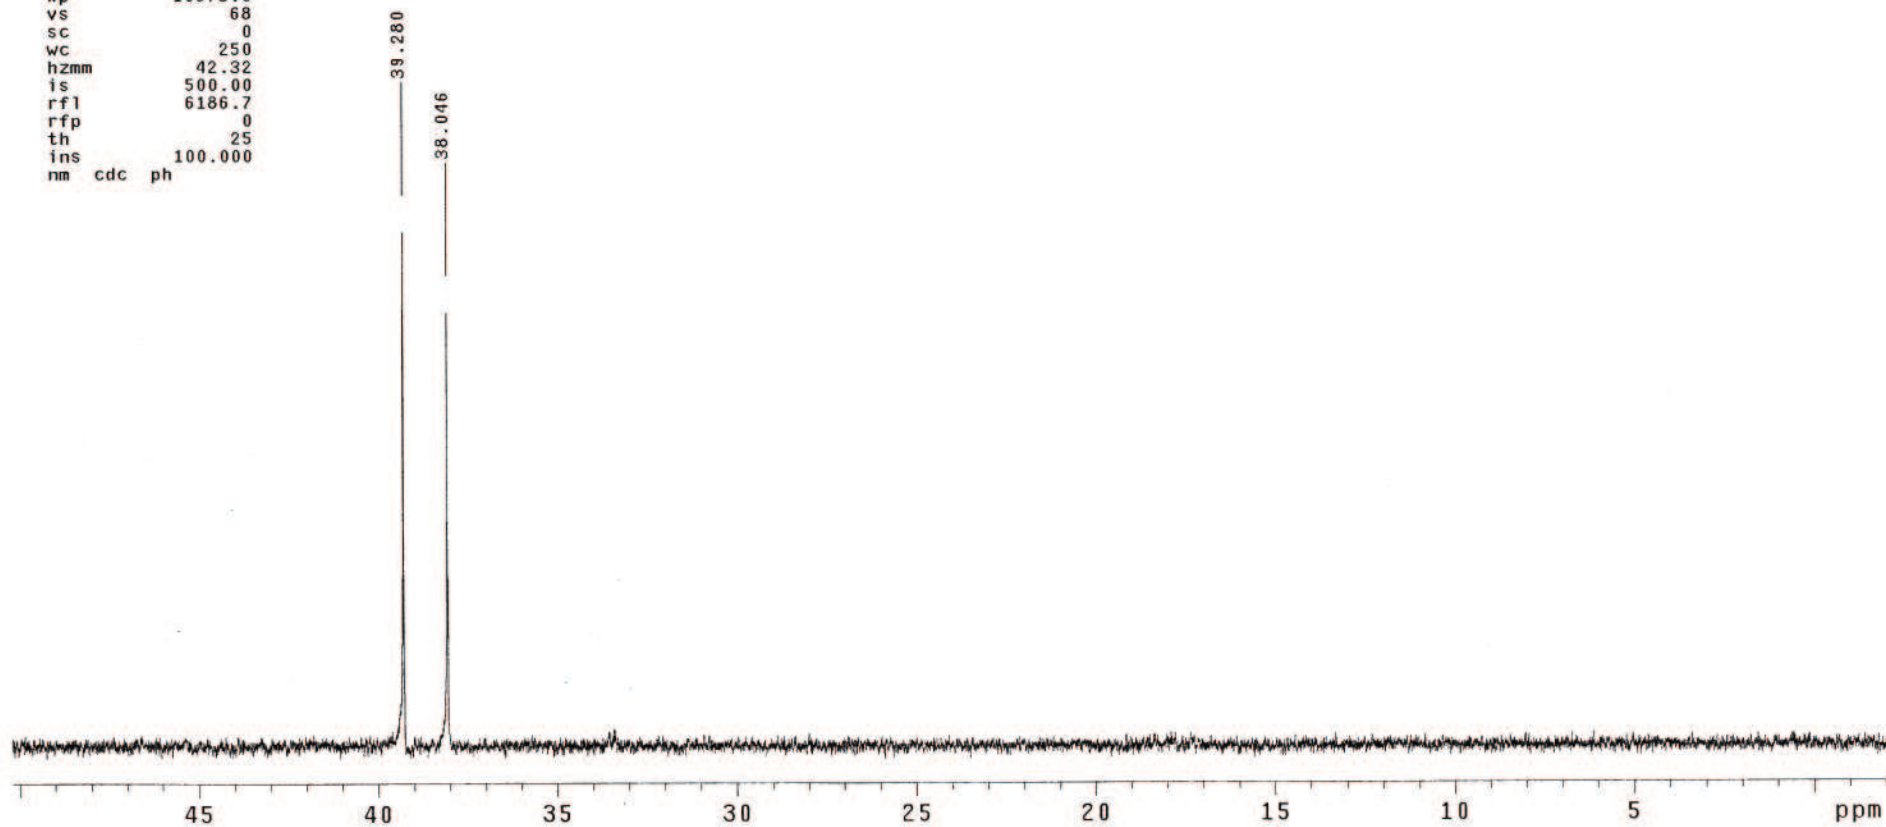

Archive directory: /export/home/vnmr1/vnmrsys/data  
Sample directory:  
File: PROTON

Pulse Sequence: s2pu1

Solvent: CDCl3  
Ambient temperature  
INOVA-500 "Inova500"

Relax. delay 1.000 sec  
Pulse 24.5 degrees  
Acq. time 1.892 sec  
Width 7995.2 Hz  
4 repetitions  
OBSERVE H1, 499.6299995 MHz  
DATA PROCESSING  
FT size 32768  
Total time 0 min, 11 sec

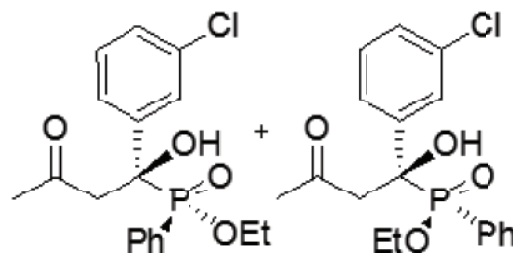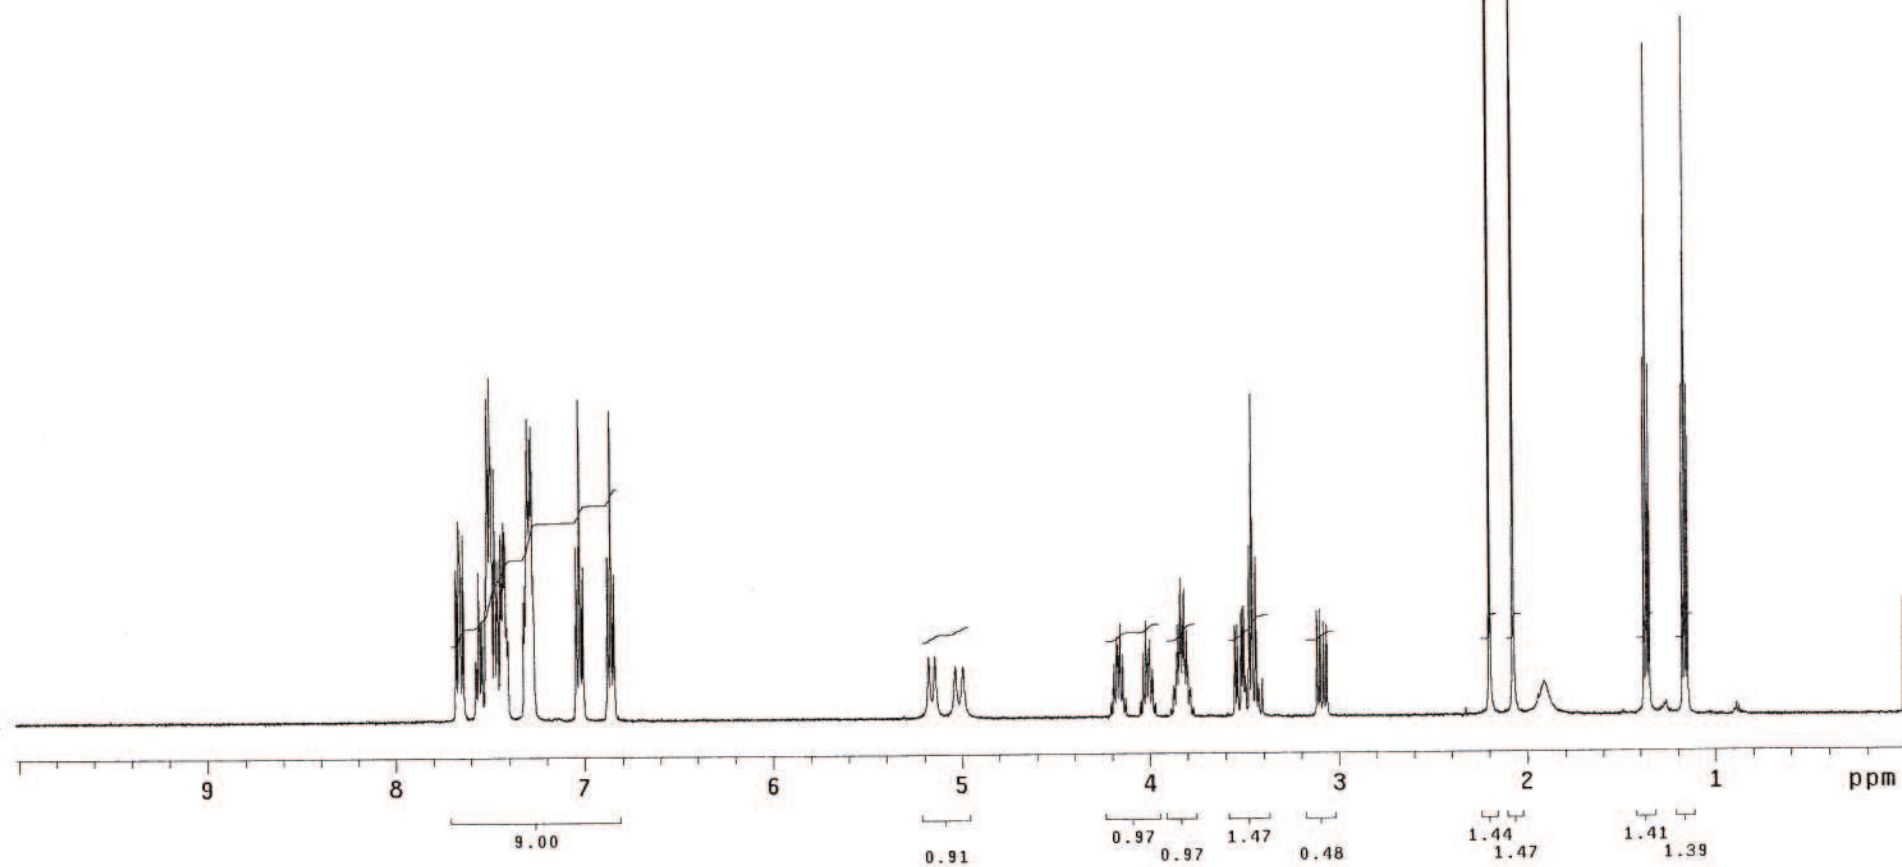

STANDARD CARBON PARAMETERS  
V-SS-154C

Archive directory: /home/samanta/vnmrsys/data  
Sample directory:

Pulse Sequence: s2pu1

Solvent: CDC13  
Ambient temperature  
User: 1-14-87  
File: V-SS-154C  
INOVA-500 "Inova500"

Relax. delay 1.000 sec  
Pulse 45.0 degrees  
Acq. time 1.300 sec  
Width 31409.5 Hz  
3000 repetitions  
OBSERVE C13, 125.6479222 MHz  
DECOUPLE H1, 499.6956872 MHz  
Power 36 dB  
continuously on  
WALTZ-16 modulated  
DATA PROCESSING  
Line broadening 0.5 Hz  
FT size 131072  
Total time 1 hr, 55 min, 28 sec

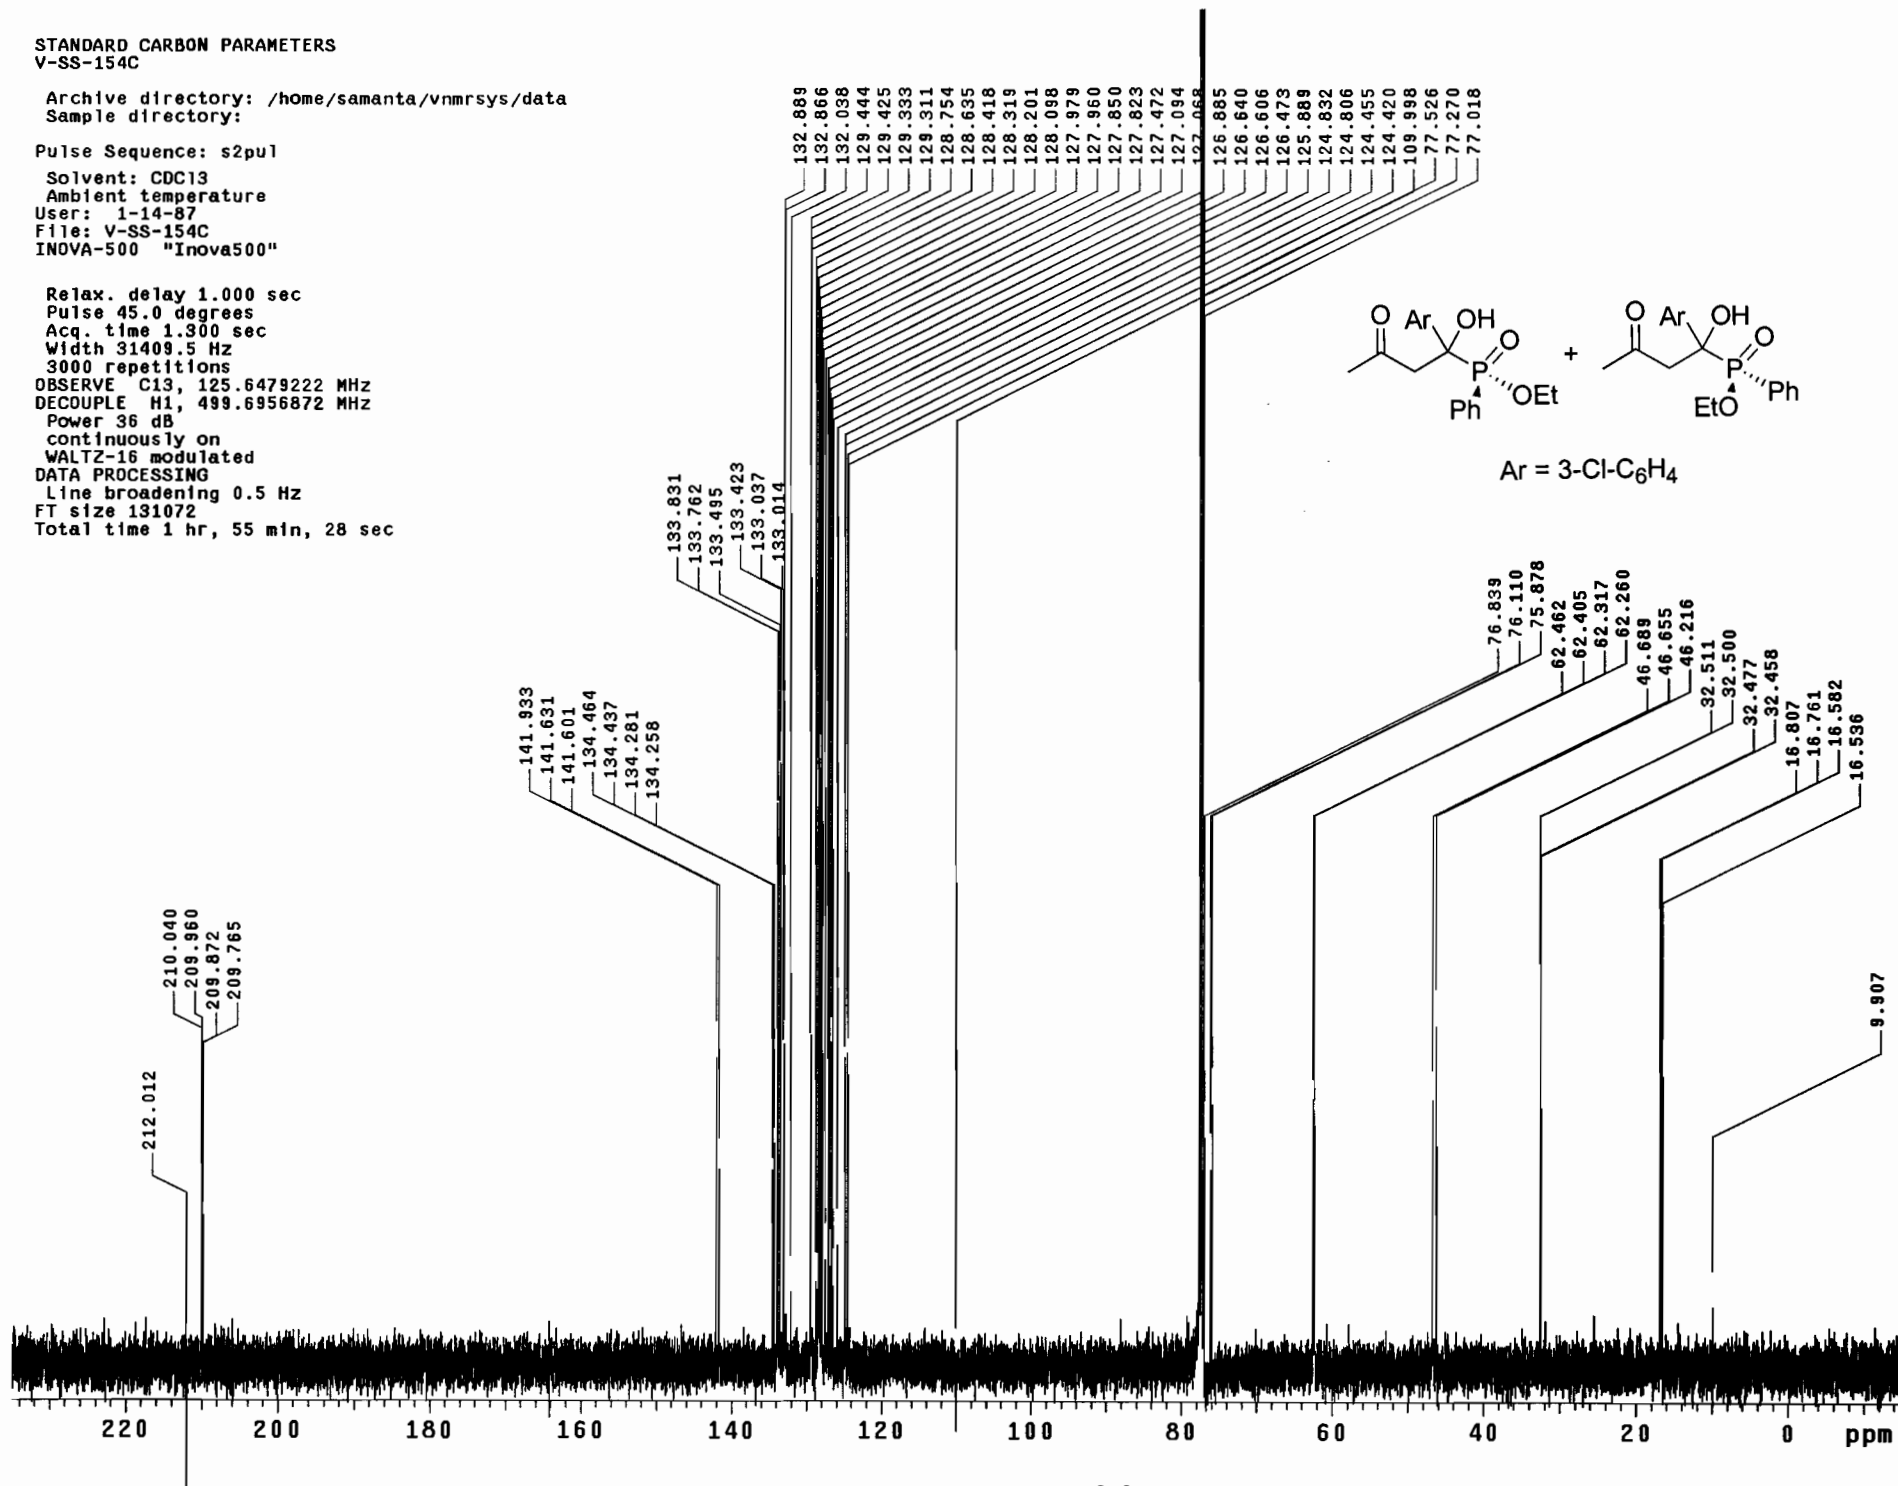

3-sp-24

exp1 s2pu1

|             |             |            |          |
|-------------|-------------|------------|----------|
| SAMPLE      |             | DEC. & VT  |          |
| date        | Dec 30 2009 | dfrq       | 499.632  |
| solvent     | CDC13       | dn         | H1       |
| file        | exp         | dpwr       | 36       |
| ACQUISITION |             | dof        | 0        |
| sfrq        | 202.258     | dm         | nny      |
| tn          | P31         | dmm        | w        |
| at          | 1.600       | dmf        | 10954    |
| np          | 64000       | dseq       |          |
| sw          | 20000.0     | dres       | 1.0      |
| fb          | 11000       | homo       | n        |
| tpwr        | 54          | temp       | 26.0     |
| pw          | 4.0         | PROCESSING |          |
| d1          | 5.000       | lb         | 1.00     |
| tof         | 9000.0      | wtfile     |          |
| nt          | 16          | proc       | ft       |
| ct          | 16          | fn         | not used |
| alock       | n           | math       | f        |
| gain        | not used    |            |          |
| FLAGS       |             | werr       | n        |
| il          | n           | wexp       | n        |
| in          | n           | wbs        | n        |
| dp          | y           | wnt        | y        |
| hs          | ny          |            |          |
| DISPLAY     |             |            |          |
| sp          | -427.9      |            |          |
| wp          | 10578.9     |            |          |
| vs          | 80          |            |          |
| sc          | 0           |            |          |
| wc          | 250         |            |          |
| hzmm        | 42.32       |            |          |
| is          | 500.00      |            |          |
| rfl         | 6186.7      |            |          |
| rfp         | 0           |            |          |
| th          | 5           |            |          |
| ins         | 100.000     |            |          |
| nm          | cdc ph      |            |          |

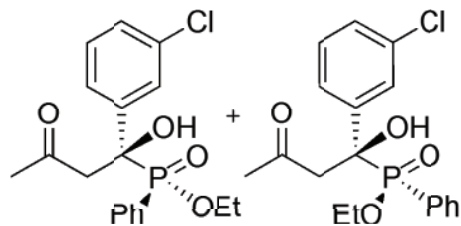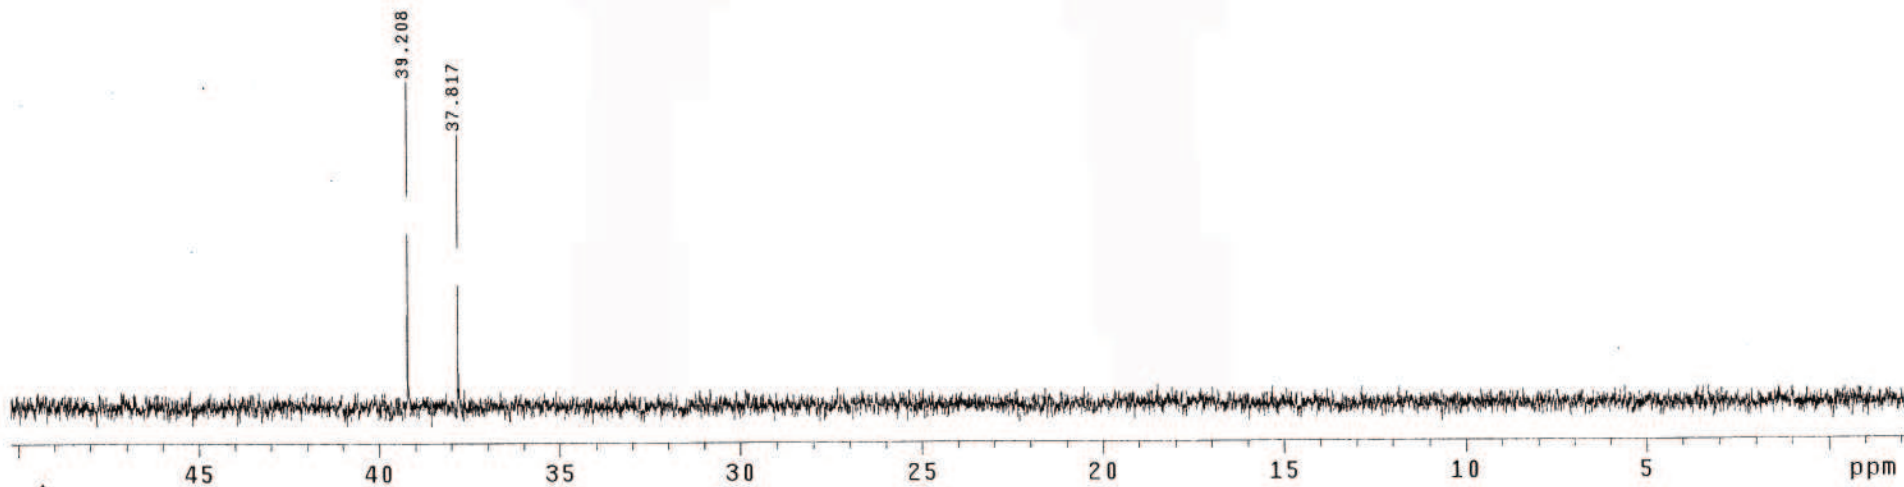



Archive directory: /export/home/vnmr1/vnmrsys/data  
Sample directory:  
File: PROTON

Pulse Sequence: s2pu1

Solvent: CDC13  
Ambient temperature  
INOVA-500 "Inova500"

Relax. delay 1.000 sec  
Pulse 24.5 degrees  
Acq. time 1.892 sec  
Width 7995.2 Hz  
32 repetitions  
OBSERVE H1, 499.6299995 MHz  
DATA PROCESSING  
FT size 32768  
Total time 1 min, 32 sec

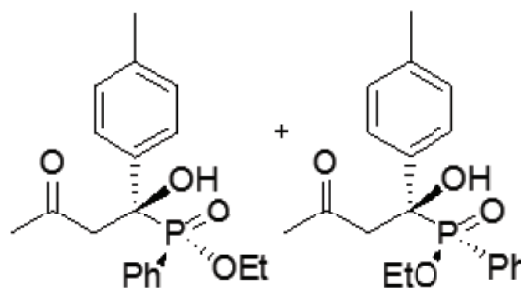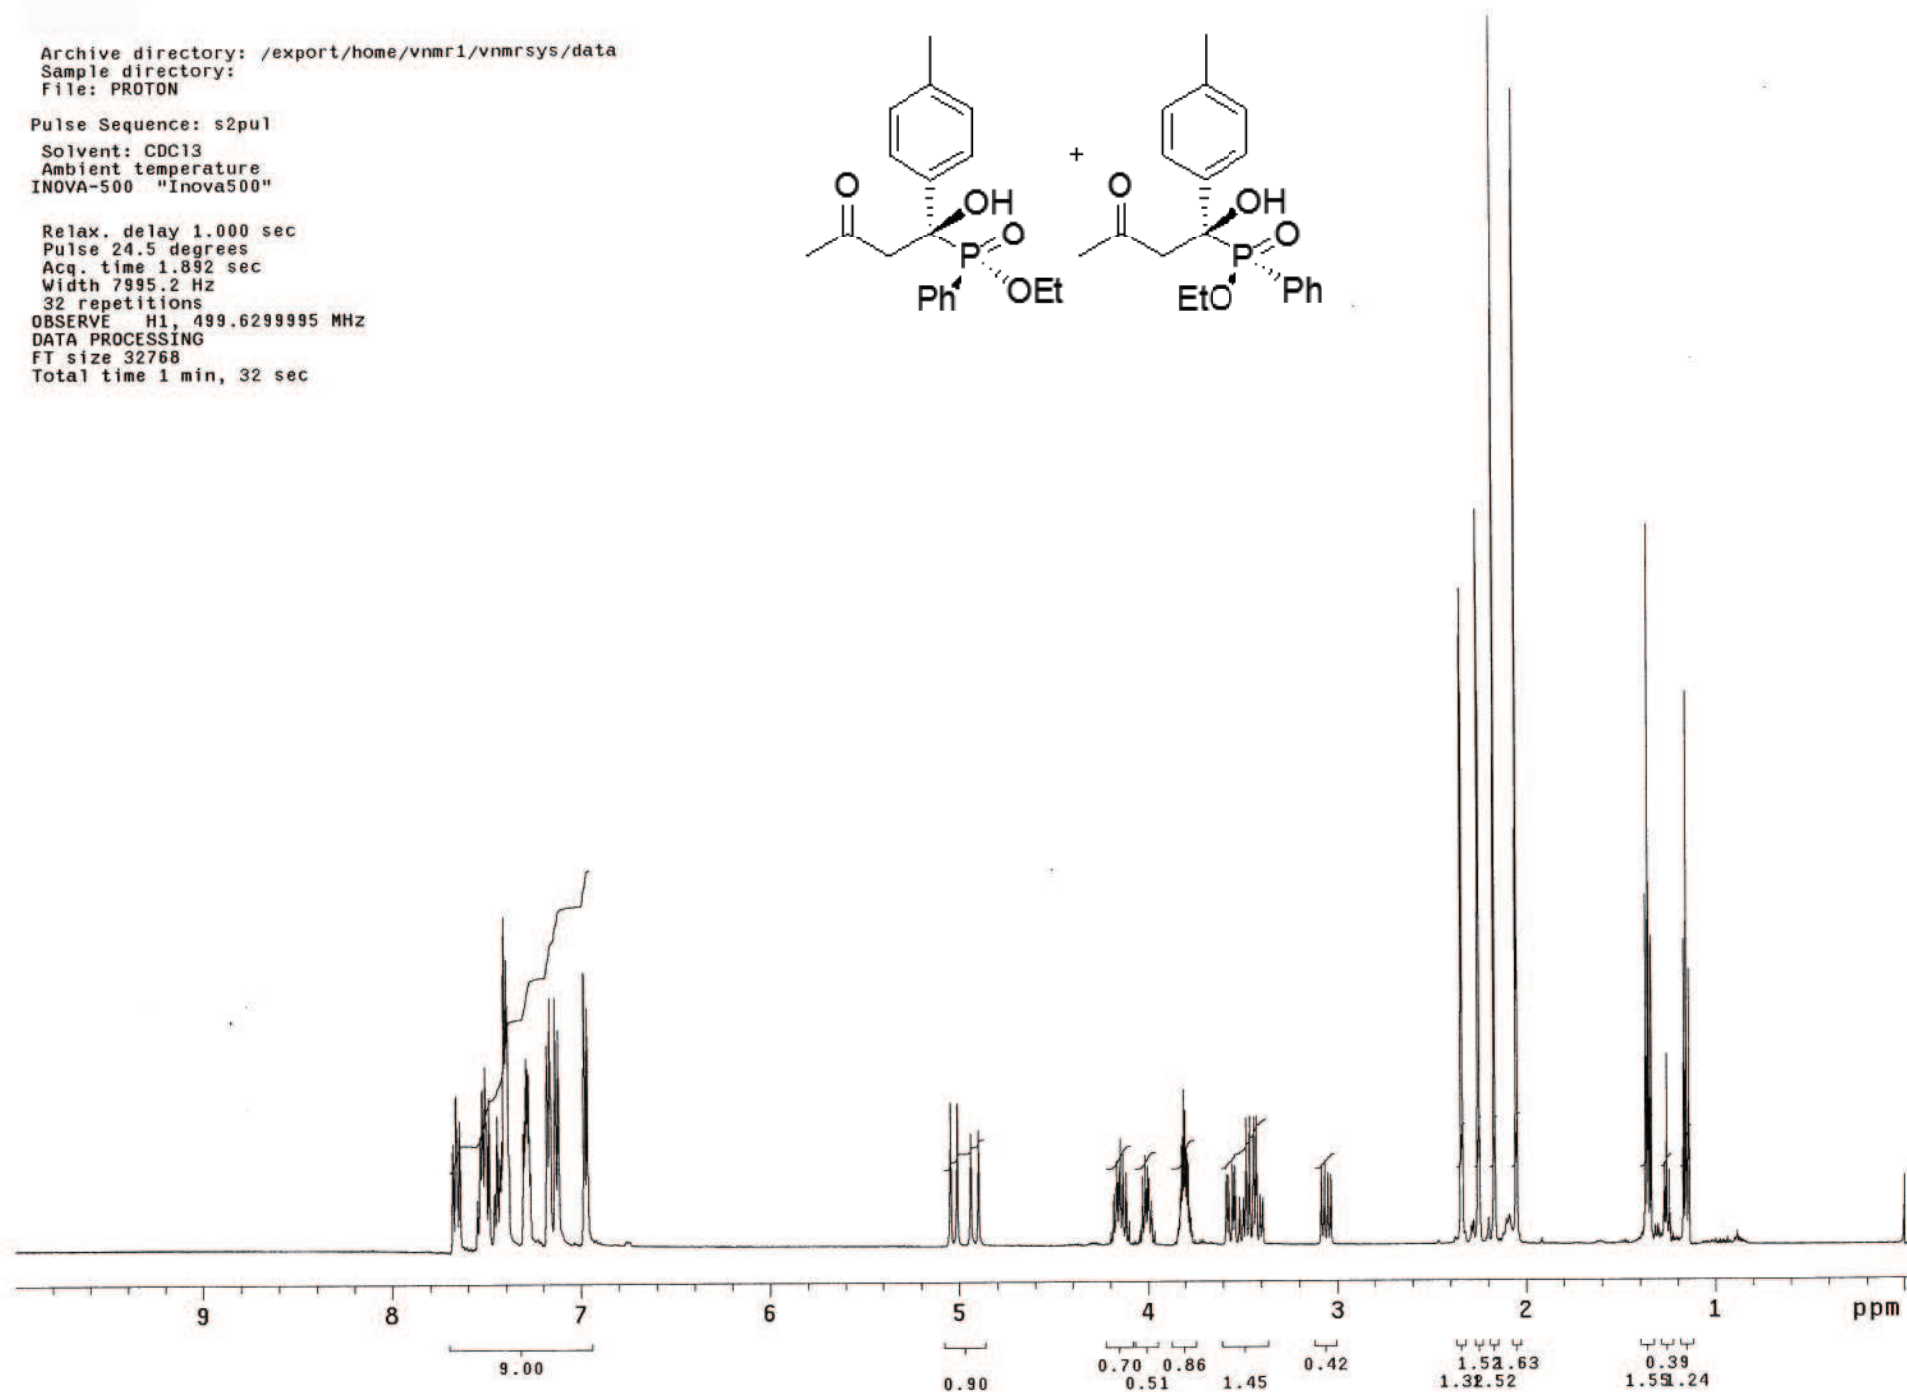



STANDARD CARBON PARAMETERS  
v-ss-89c

Archive directory: /home/samanta/vnmrSYS/data  
Sample directory:

Pulse Sequence: s2pu1

Solvent: CDC13  
Ambient temperature  
User: 1-14-87  
File: v-ss-89c  
INOVA-500 "Inova500"

Relax. delay 1.000 sec  
Pulse 45.0 degrees  
Acq. time 1.300 sec  
Width 31409.5 Hz  
20000 repetitions  
OBSERVE C13, 125.6479222 MHz  
DECOUPLE H1, 499.6956872 MHz  
Power 36 dB  
continuously on  
WALTZ-16 modulated  
DATA PROCESSING  
Line broadening 0.5 Hz  
FT size 131072  
Total time 12 hr, 49 min, 47 sec

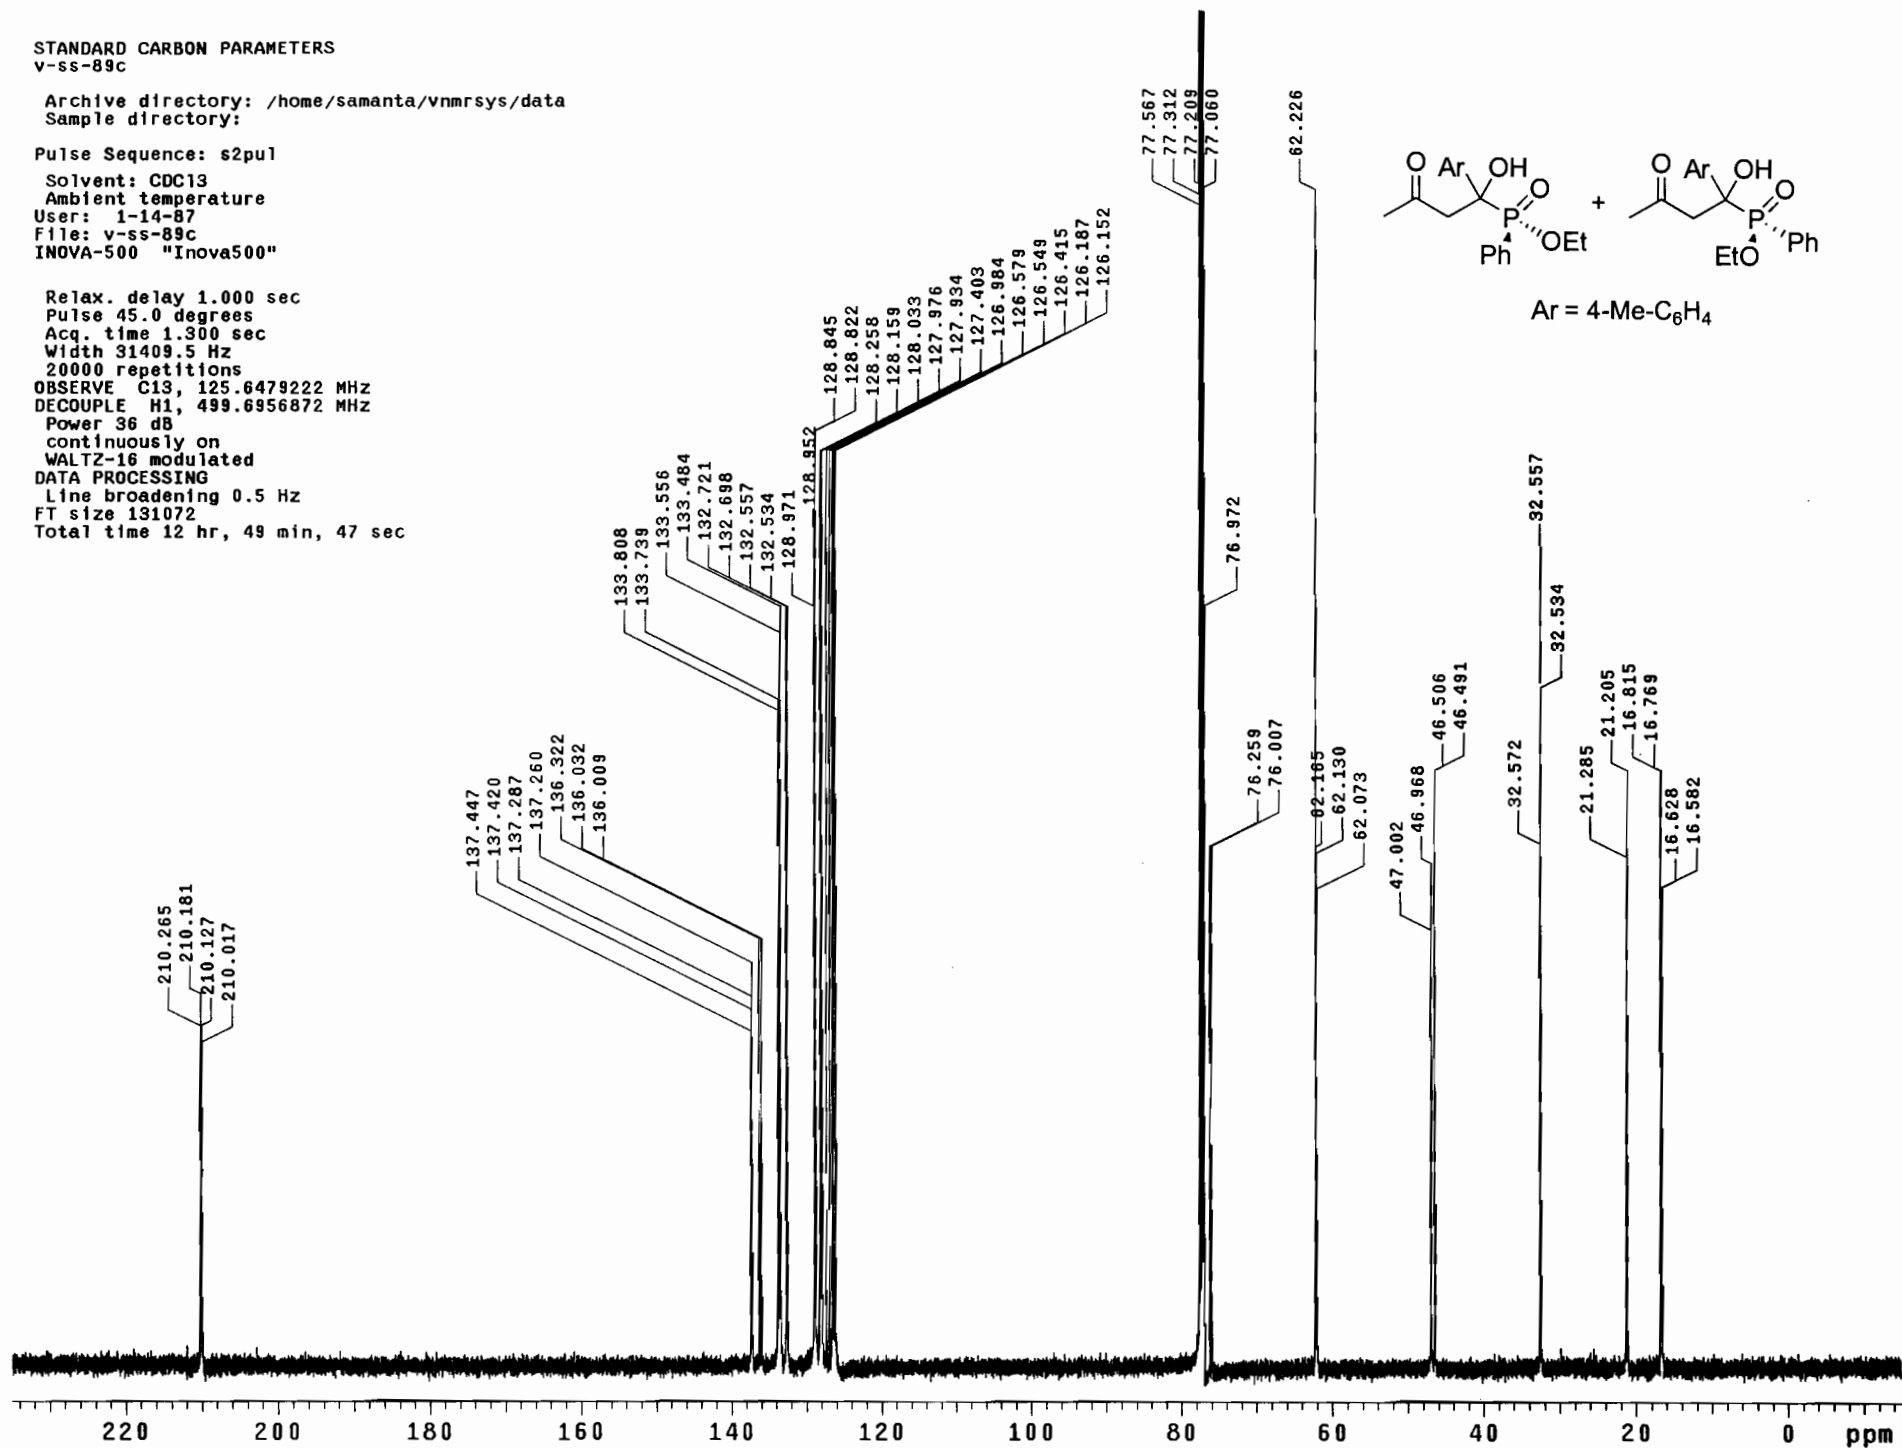

exp1 s2pul

| SAMPLE      |             | DEC. & VT |          |
|-------------|-------------|-----------|----------|
| date        | Dec 30 2009 | dfrq      | 499.632  |
| solvent     | CDC13       | dn        | H1       |
| file        | exp         | dpwr      | 36       |
| ACQUISITION |             | dof       | 0        |
| sfrq        | 202.258     | dm        | nny      |
| tn          | P31         | dmm       | w        |
| at          | 1.600       | dmf       | 10954    |
| np          | 64000       | dseq      |          |
| sw          | 20000.0     | dres      | 1.0      |
| fb          | 11000       | homo      | n        |
| tpwr        | 54          | temp      | 26.0     |
| PROCESSING  |             | lb        | 1.00     |
| pw          | 4.0         | wtfile    |          |
| d1          | 5.000       | proc      | ft       |
| tof         | 9000.0      | fn        | not used |
| nt          | 16          | math      | f        |
| ct          | 16          |           |          |
| alock       | n           |           |          |
| gain        | not used    |           |          |
| FLAGS       |             | werr      |          |
| il          | n           | wexp      |          |
| in          | n           | wbs       |          |
| dp          | y           | wnt       |          |
| hs          | ny          |           |          |
| DISPLAY     |             |           |          |
| sp          | -396.7      |           |          |
| wp          | 10484.9     |           |          |
| vs          | 80          |           |          |
| sc          | 0           |           |          |
| wc          | 250         |           |          |
| hzmm        | 41.94       |           |          |
| is          | 500.00      |           |          |
| rfl         | 6186.7      |           |          |
| rfp         | 0           |           |          |
| th          | 58          |           |          |
| ins         | 100.000     |           |          |
| nm          | cdc ph      |           |          |

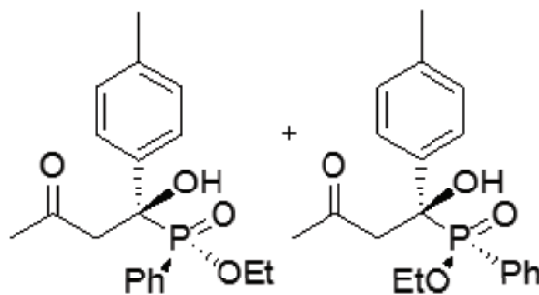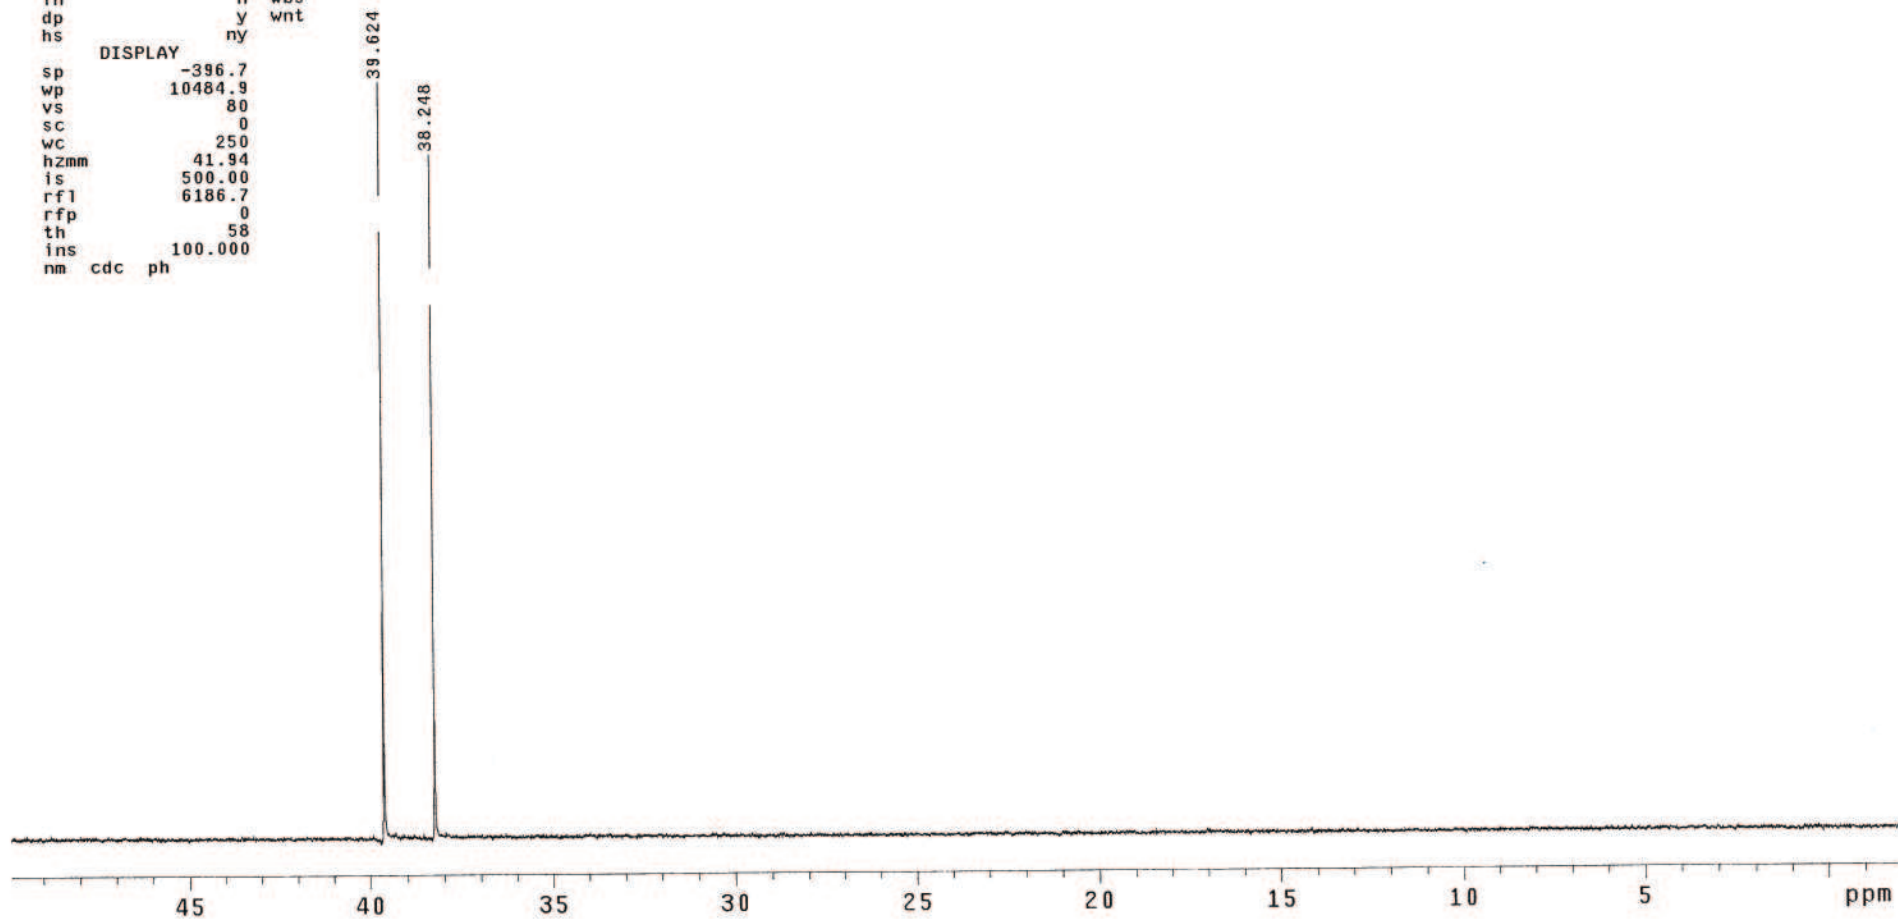

Archive directory: /export/home/vnmr1/vnmrsys/data  
Sample directory:  
File: PROTON

Pulse Sequence: s2pu1  
Solvent: CDC13  
Ambient temperature  
Mercury-300BB "varian300"

Relax. delay 1.000 sec  
Pulse 52.0 degrees  
Acq. time 1.998 sec  
Width 4789.3 Hz  
64 repetitions  
OBSERVE H1, 299.9597215 MHz  
DATA PROCESSING  
FT size 32768  
Total time 3 min, 15 sec

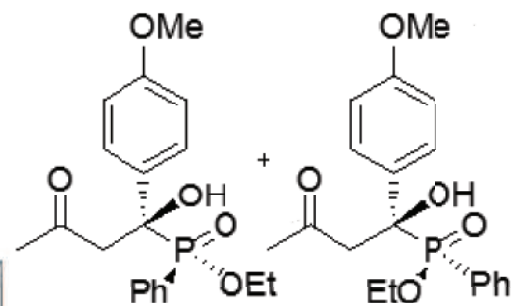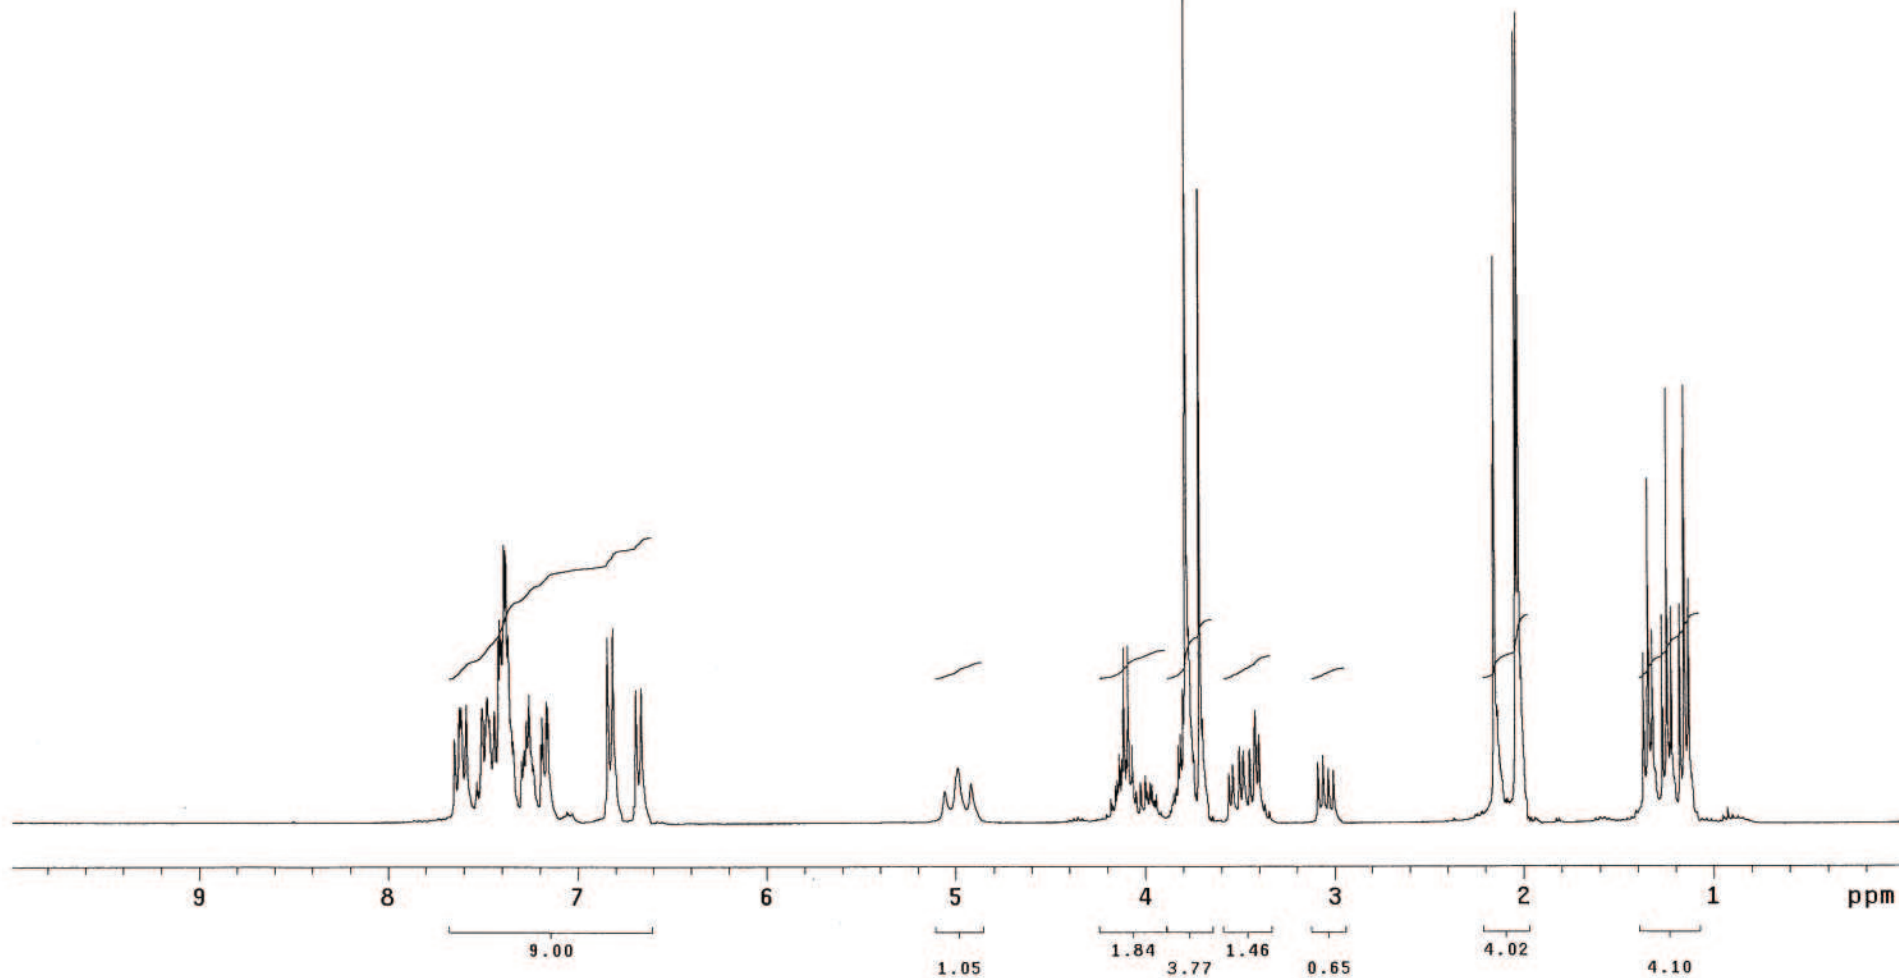

STANDARD CARBON PARAMETERS  
v-ss-94paramethoxycarbon

Archive directory: /home/samanta/vnmrsys/data  
Sample directory:

Pulse Sequence: s2pu1

Solvent: CDC13

Ambient temperature

User: 1-14-87

File: v-ss-94paramethoxycarbon

INOVA-500 "Inova500"

Relax. delay 1.000 sec

Pulse 45.0 degrees

Acq. time 1.300 sec

Width 31409.5 Hz

10000 repetitions

OBSERVE C13, 125.6479222 MHz

DECOUPLE H1, 499.6956872 MHz

Power 36 dB

continuously on

WALTZ-16 modulated

DATA PROCESSING

Line broadening 0.5 Hz

FT size 131072

Total time 6 hr, 24 min, 53 sec

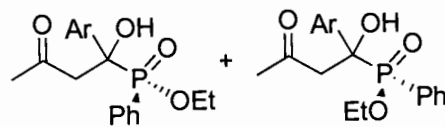

Ar = 4-MeO-C<sub>6</sub>H<sub>4</sub>

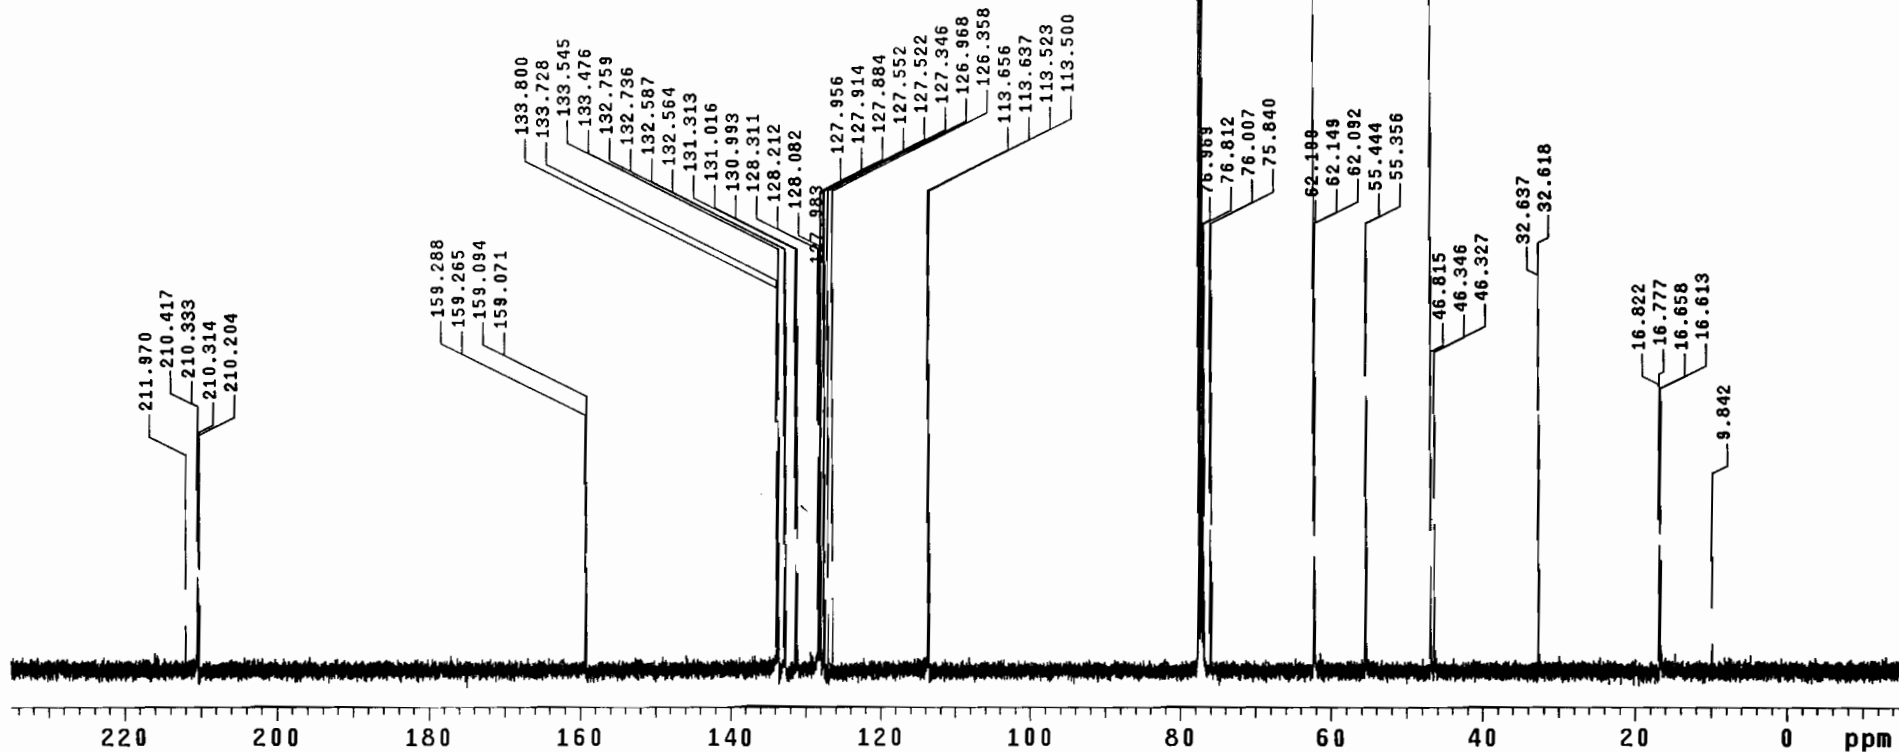

```

exp1 s2pul
SAMPLE DEC. & VT
date Dec 30 2009 dfrq 499.632
solvent CDC13 dn H1
file exp dpwr 36
ACQUISITION dof 0
sfrq 202.258 dm nny
tn P31 dmm w
at 1.600 dmf 10954
np 64000 dseq
sw 20000.0 dres 1.0
fb 11000 homo n
tpwr 54 temp 26.0
pw 4.0
d1 5.000 lb PROCESSING 1.00
tof 9000.0 wtfile
nt 16 proc ft
ct 16 fn not used f
alock n math
gain not used
FLAGS werr
il n wexp
in n wbs
dp y wnt
hs ny
DISPLAY
sp -427.9
wp 10578.9
vs 78
sc 0
wc 250
hzmm 42.32
is 500.00
rfl 6186.7
rfp 0
th 12
ins 100.000
nm cdc ph

```

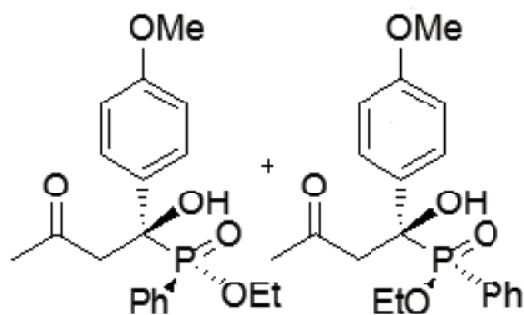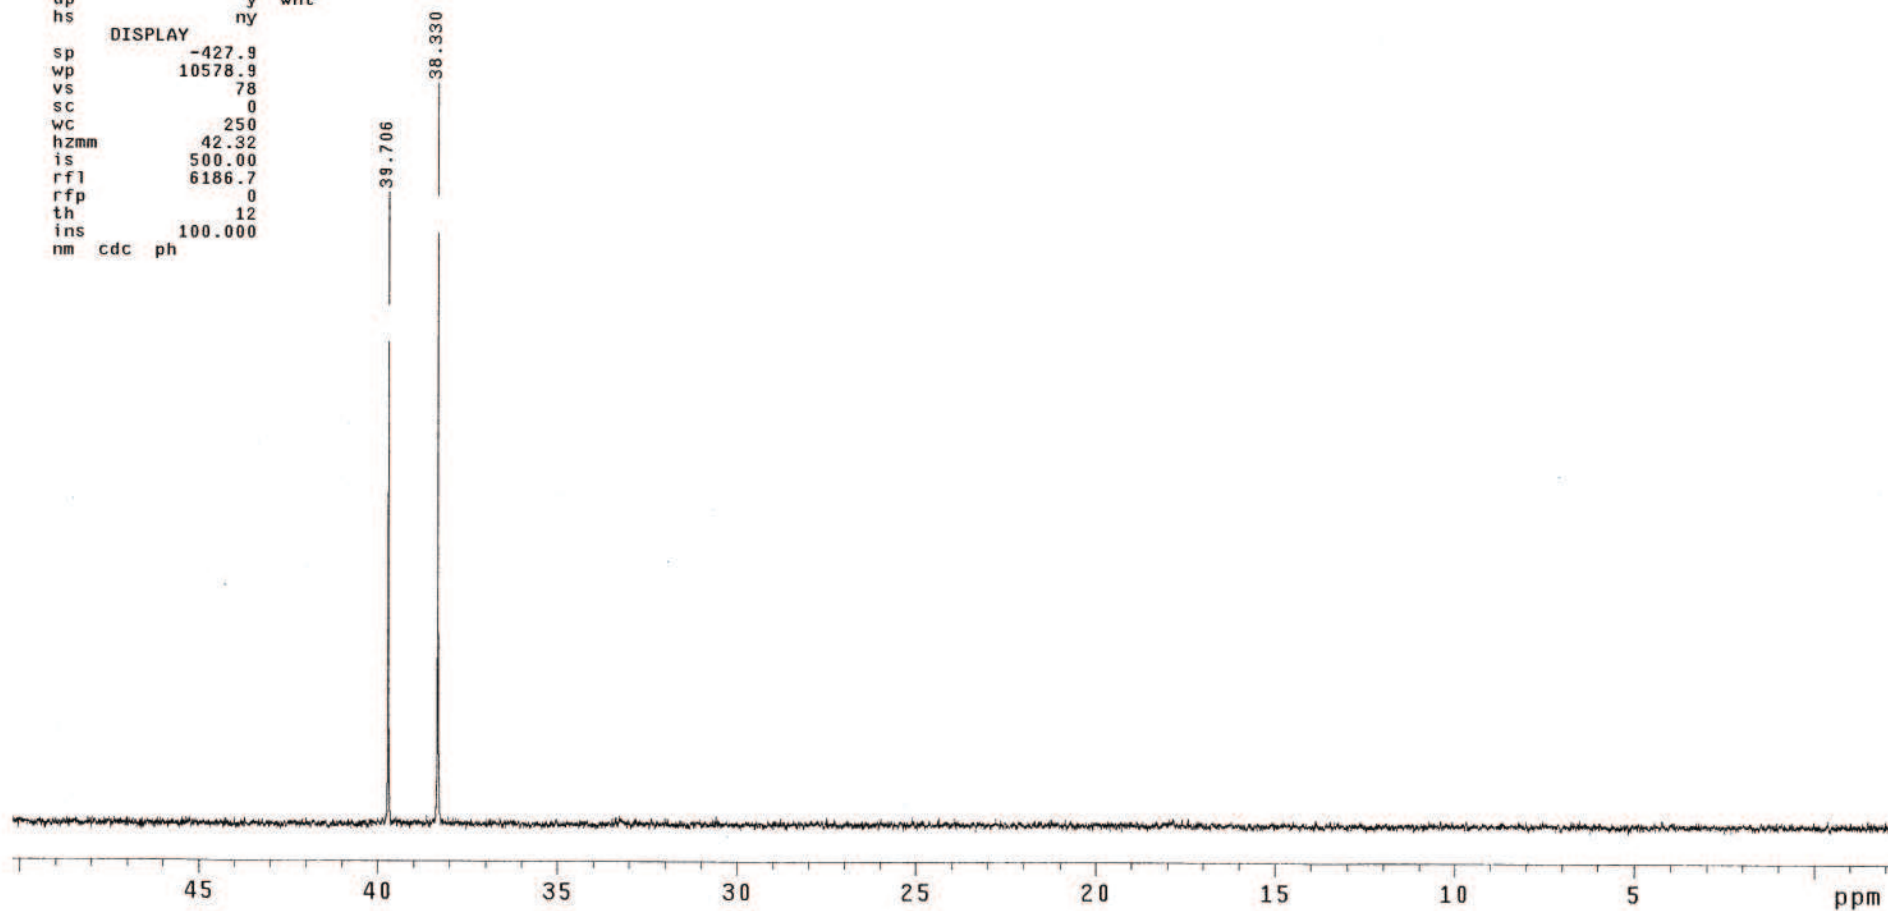

Archive directory: /export/home/vnmr1/vnmrsys/data  
Sample directory:  
File: PROTON

Pulse Sequence: s2pu1  
Solvent: CDCl3  
Ambient temperature  
INOVA-500 "Inova500"

Relax. delay 1.000 sec  
Pulse 24.5 degrees  
Acq. time 1.892 sec  
Width 7995.2 Hz  
4 repetitions  
OBSERVE H1, 499.6299995 MHz  
DATA PROCESSING  
FT size 32768  
Total time 0 min, 11 sec

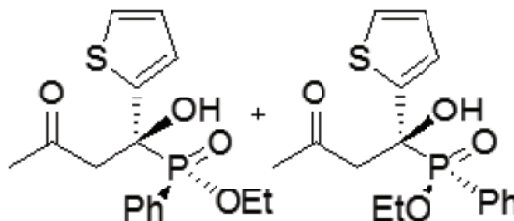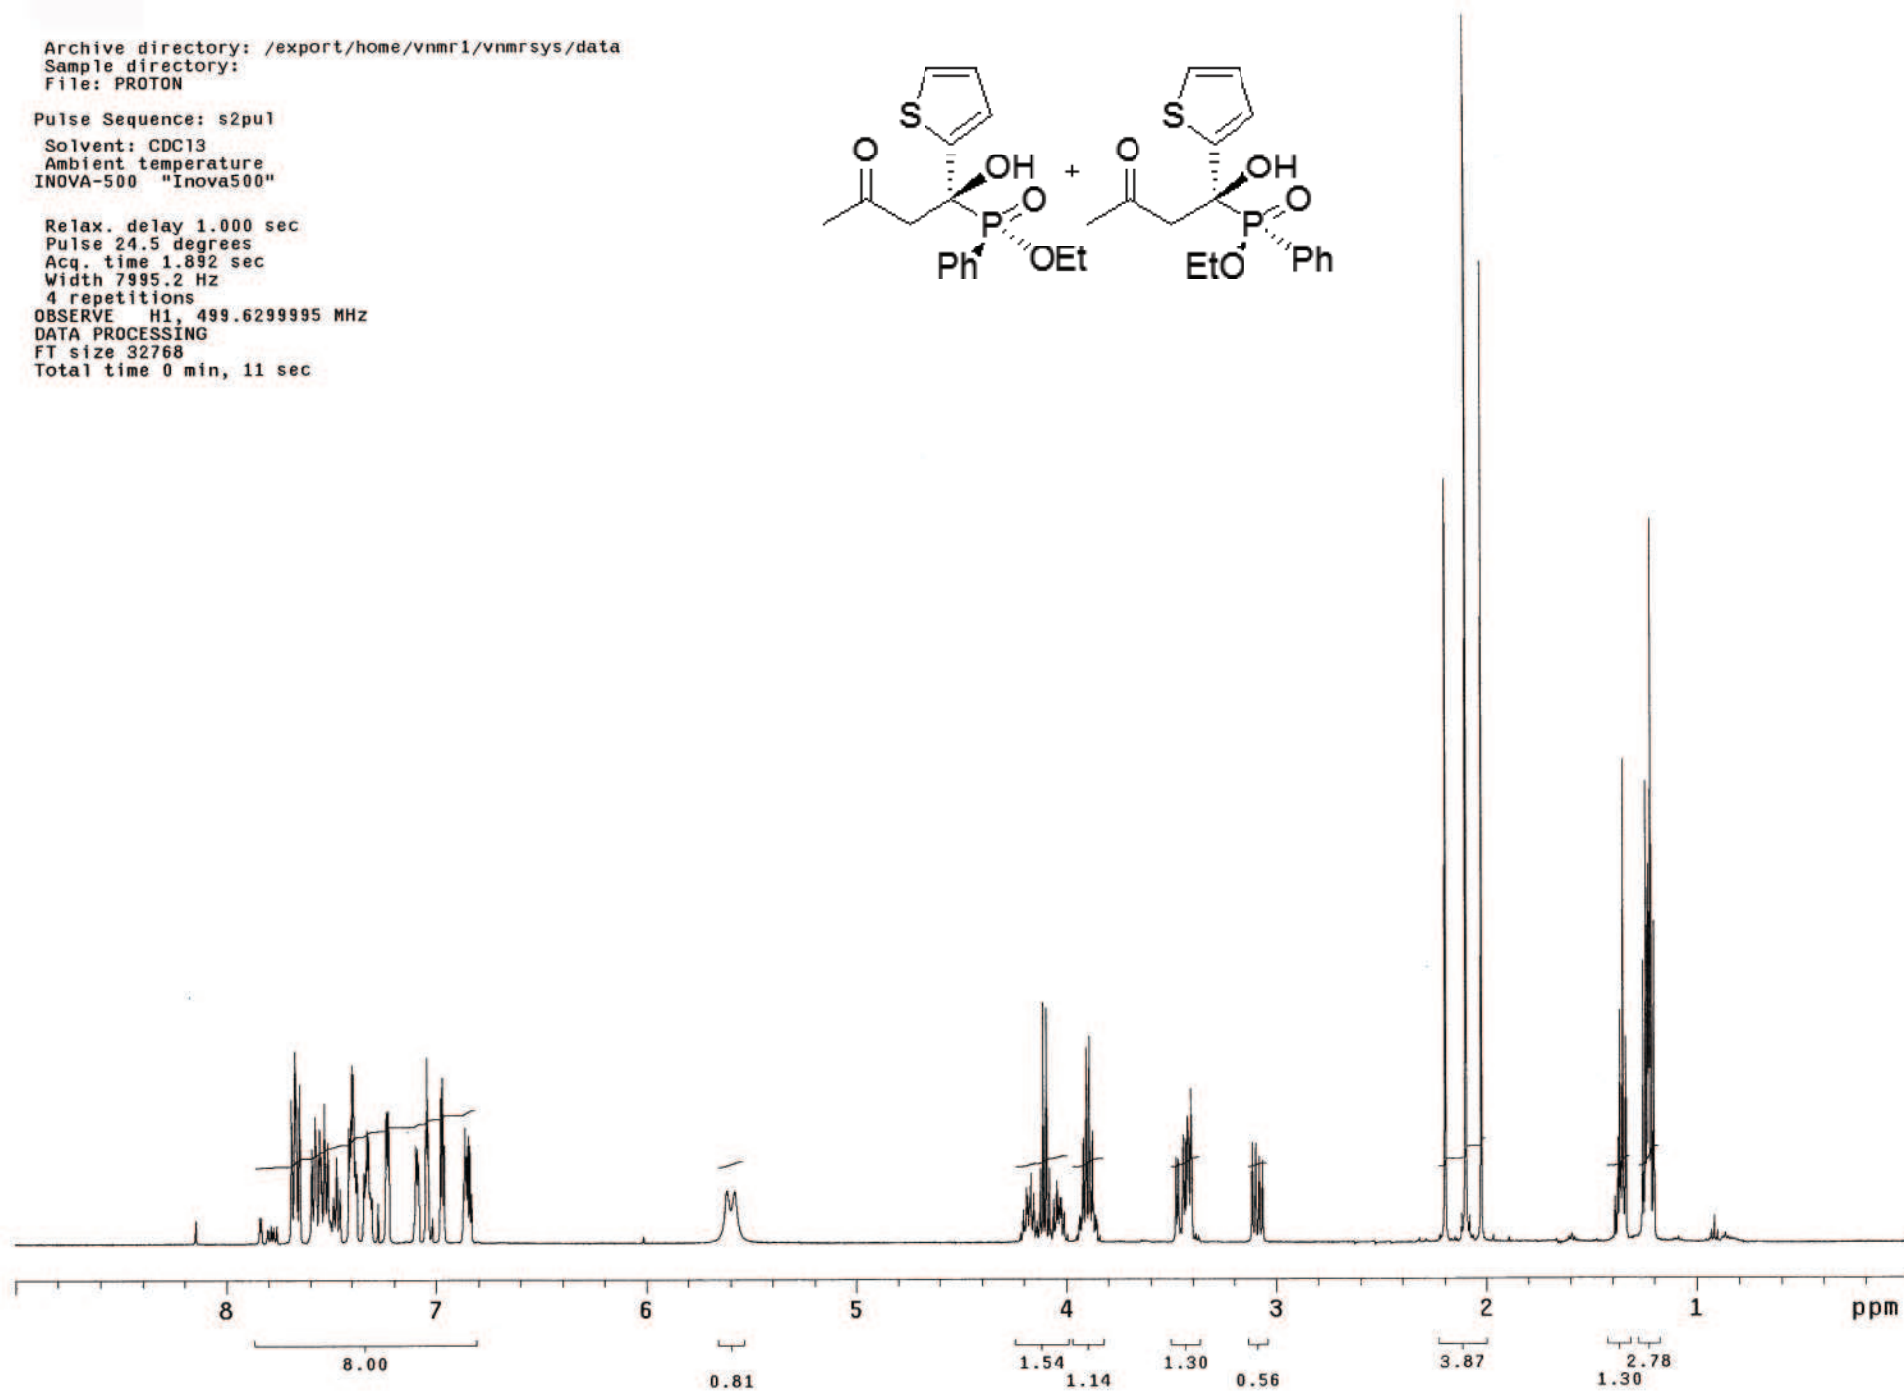

STANDARD CARBON PARAMETERS  
v-ss-134c

Archive directory: /home/samanta/vnmrsv  
Sample directory:

Pulse Sequence: s2pu1

Solvent: CDC13  
Ambient temperature  
User: 1-14-87  
File: v-ss-134c  
INOVA-500 "Inova500"

Relax. delay 1.000 sec  
Pulse 45.0 degrees  
Acq. time 1.300 sec  
Width 31409.5 Hz  
20000 repetitions  
OBSERVE C13, 125.6479222 MHz  
DECOUPLE H1, 499.6956872 MHz  
Power 36 dB  
continuously on  
WALTZ-16 modulated  
DATA PROCESSING  
Line broadening 0.5 Hz  
FT size 131072  
Total time 12 hr, 49 min, 47 sec

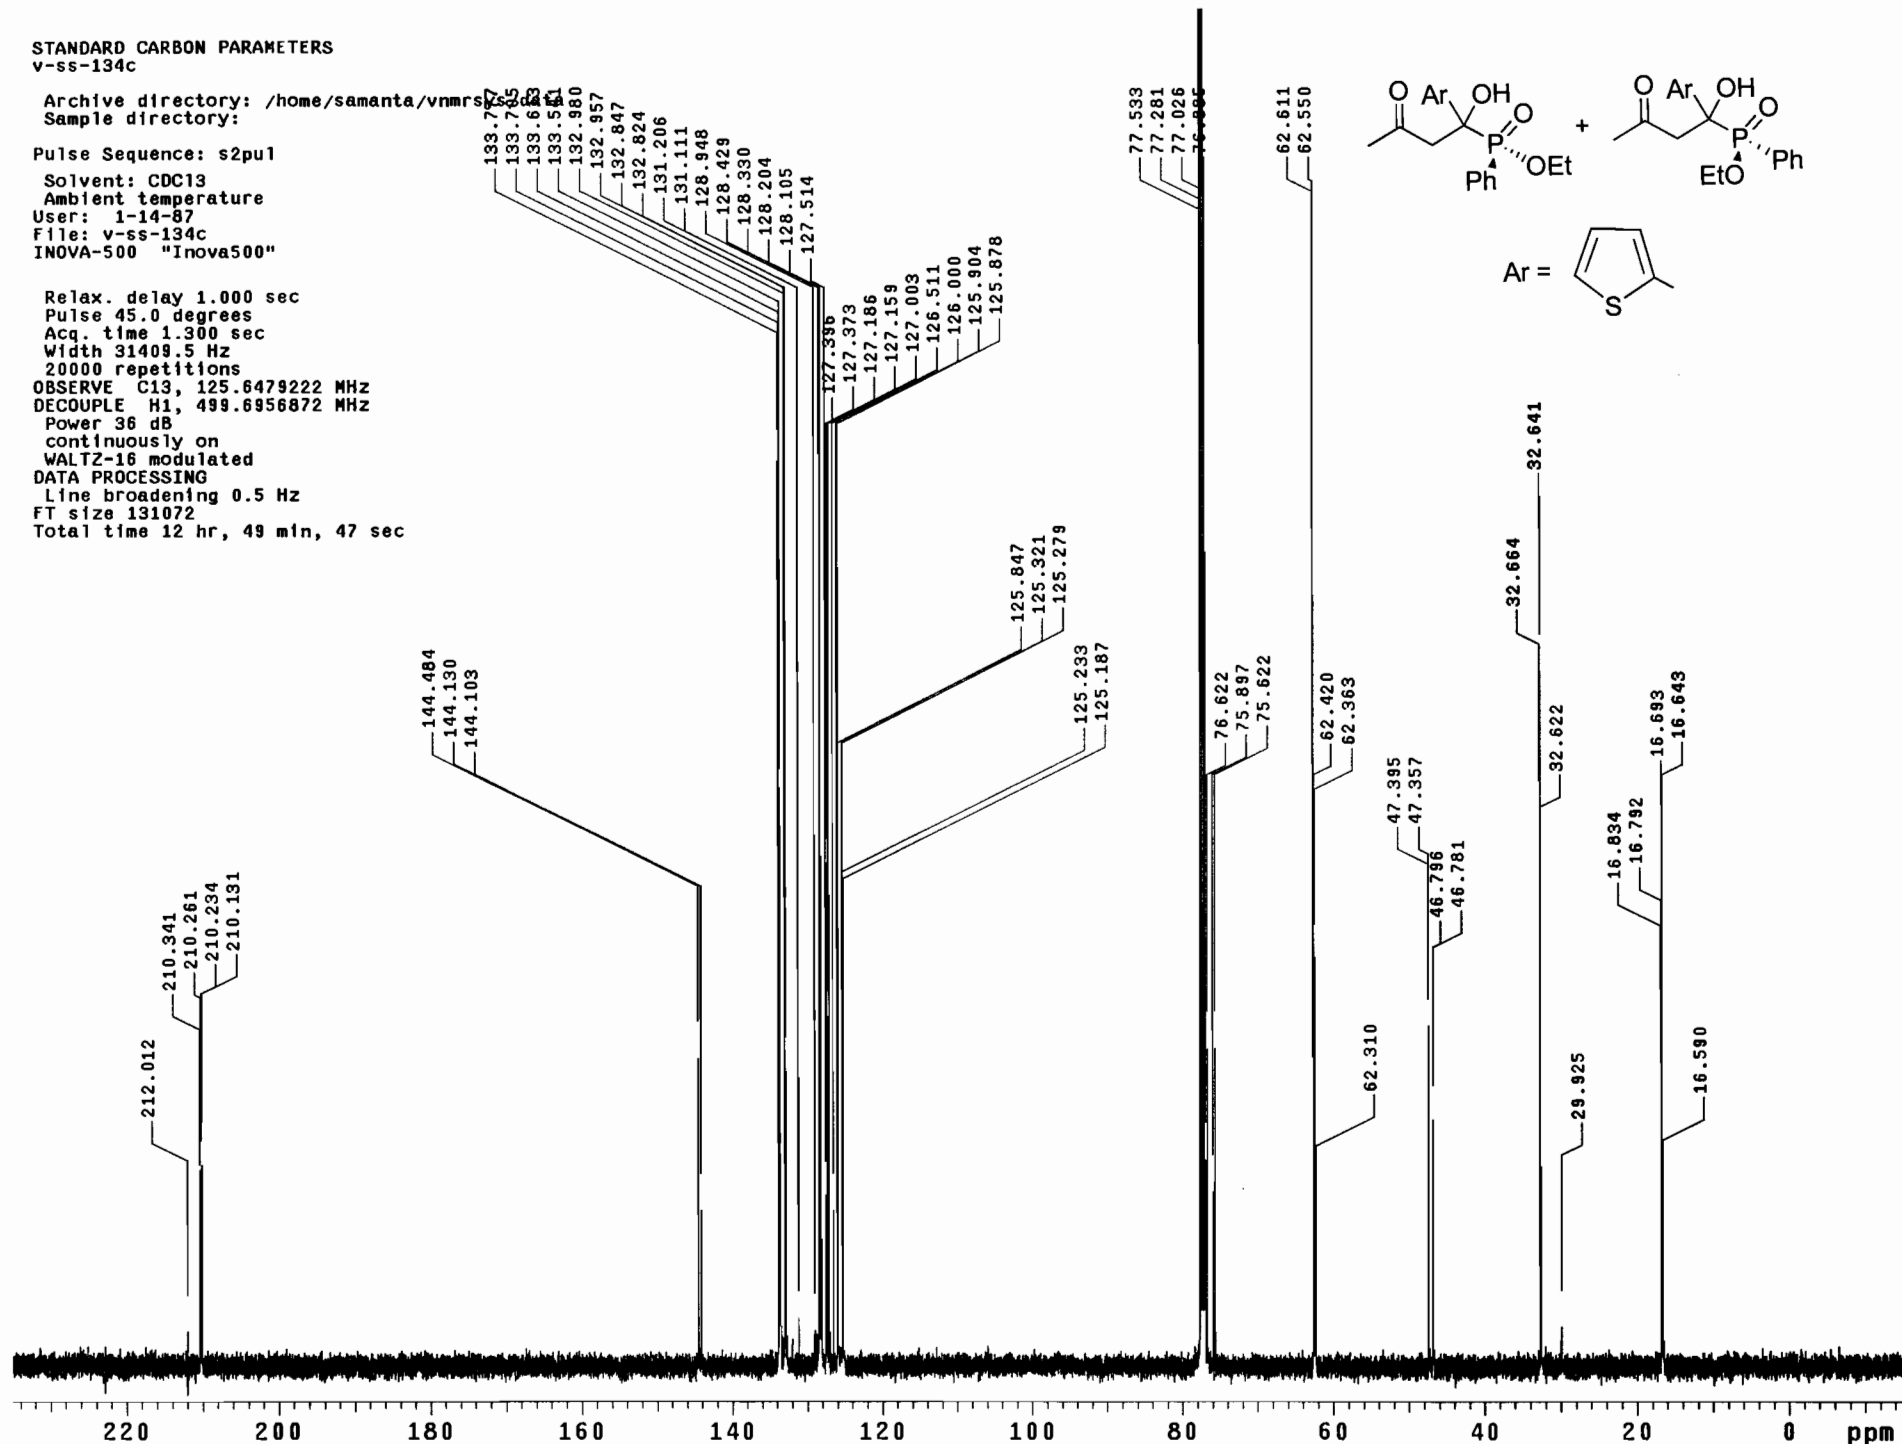

exp1 s2pul

| SAMPLE      |             | DEC. & VT  |          |
|-------------|-------------|------------|----------|
| date        | Dec 30 2009 | dfrq       | 499.632  |
| solvent     | CDCl3       | dn         | H1       |
| file        | exp         | dpwr       | 36       |
| ACQUISITION |             |            |          |
| sfrq        | 202.258     | dm         | ny       |
| tn          | P31         | dmm        | w        |
| at          | 1.600       | daf        | 10954    |
| np          | 64000       | dsq        |          |
| sw          | 20000.0     | dres       | 1.0      |
| fb          | 11000       | homo       | n        |
| tpwr        | 54          | temp       | 26.0     |
| pw          | 4.0         | PROCESSING |          |
| d1          | 5.000       | tb         | 1.00     |
| tof         | 9000.0      | wtfile     |          |
| nt          | 8           | proc       | ft       |
| ct          | 8           | in         | not used |
| alock       | n           | math       | f        |
| gain        | not used    |            |          |
| FLAGS       |             |            |          |
| il          | n           | werr       |          |
| in          | n           | wexp       |          |
| dp          | y           | wbs        |          |
| hs          | ny          | wnt        |          |
| DISPLAY     |             |            |          |
| sp          | -396.7      |            |          |
| wp          | 10484.9     |            |          |
| vs          | 80          |            |          |
| sc          | 0           |            |          |
| wc          | 250         |            |          |
| h2mm        | 41.94       |            |          |
| ts          | 500.00      |            |          |
| rfl         | 6186.2      |            |          |
| rfp         | 0           |            |          |
| th          | 42          |            |          |
| ins         | 100.000     |            |          |
| nm          | cdc ph      |            |          |

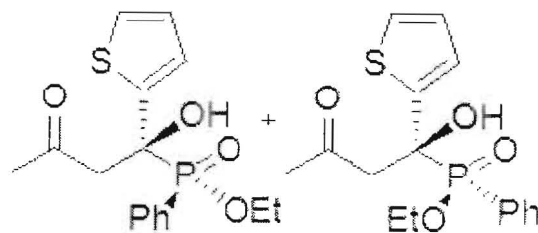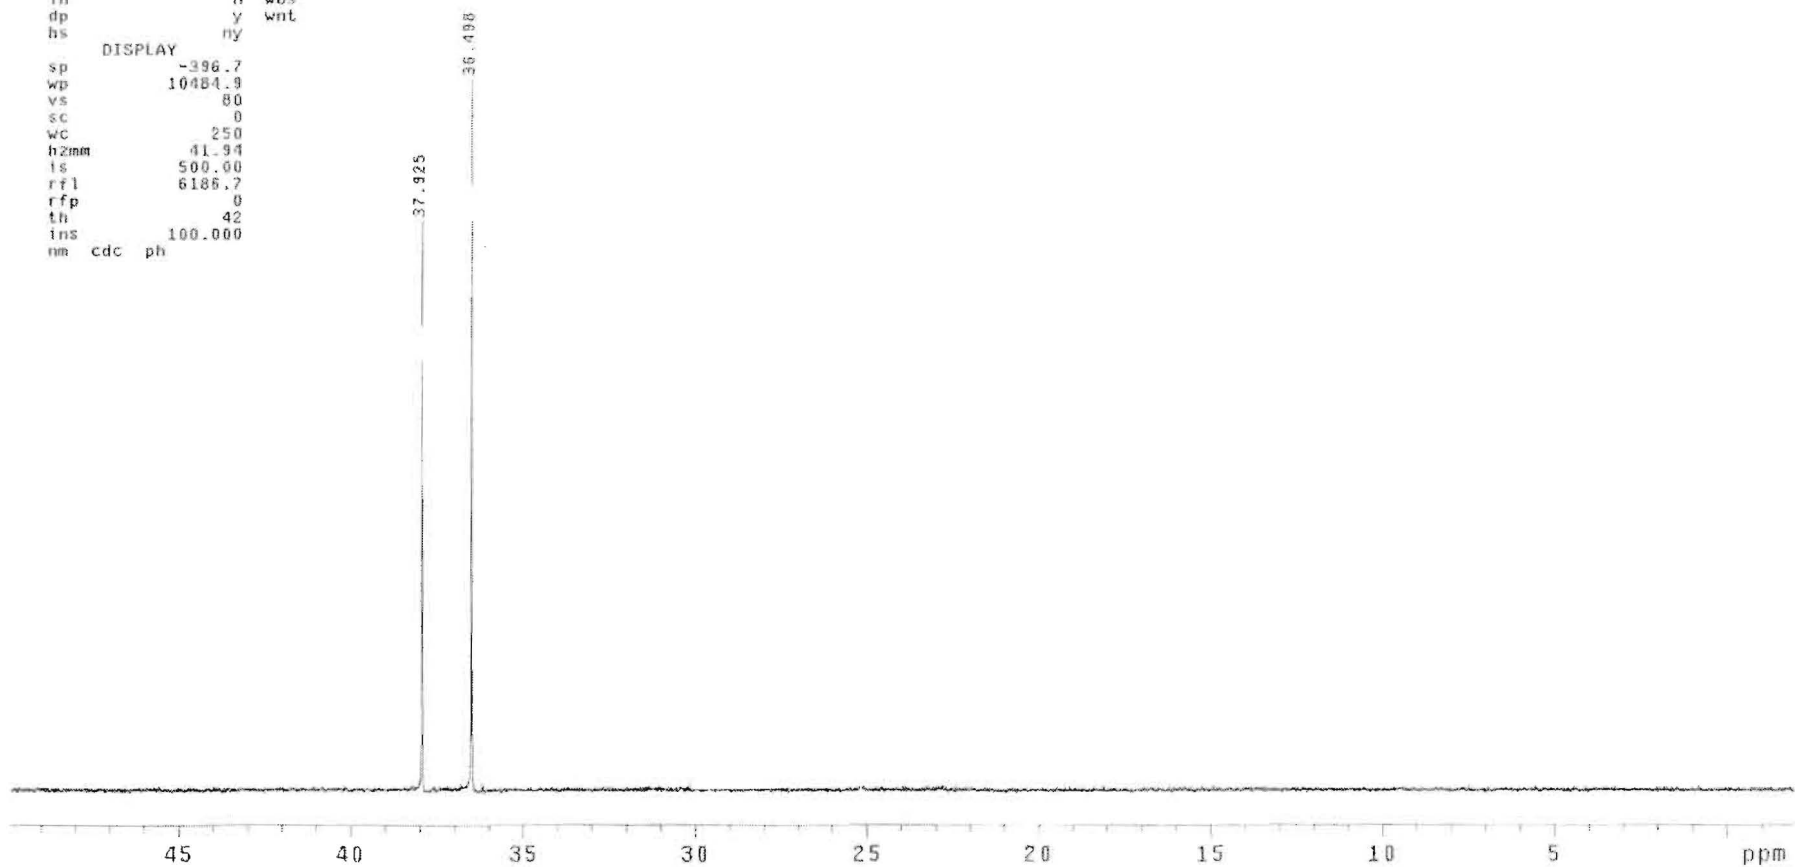



Archive directory: /export/home/vnmr1/vnmrsys/data  
Sample directory:  
File: PROTON

Pulse Sequence: s2pul

Solvent: CDC13  
Ambient temperature  
INOVA-500 "Inova500"

Relax. delay 1.000 sec  
Pulse 24.5 degrees  
Acq. time 1.892 sec  
Width 7995.2 Hz  
400 repetitions  
OBSERVE H1, 499.6391196 MHz  
DATA PROCESSING  
FT size 32768  
Total time 19 min, 20 sec

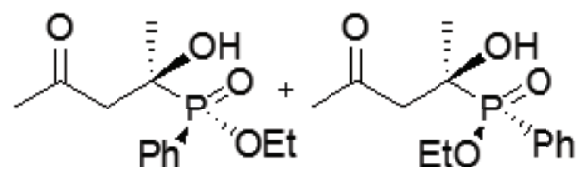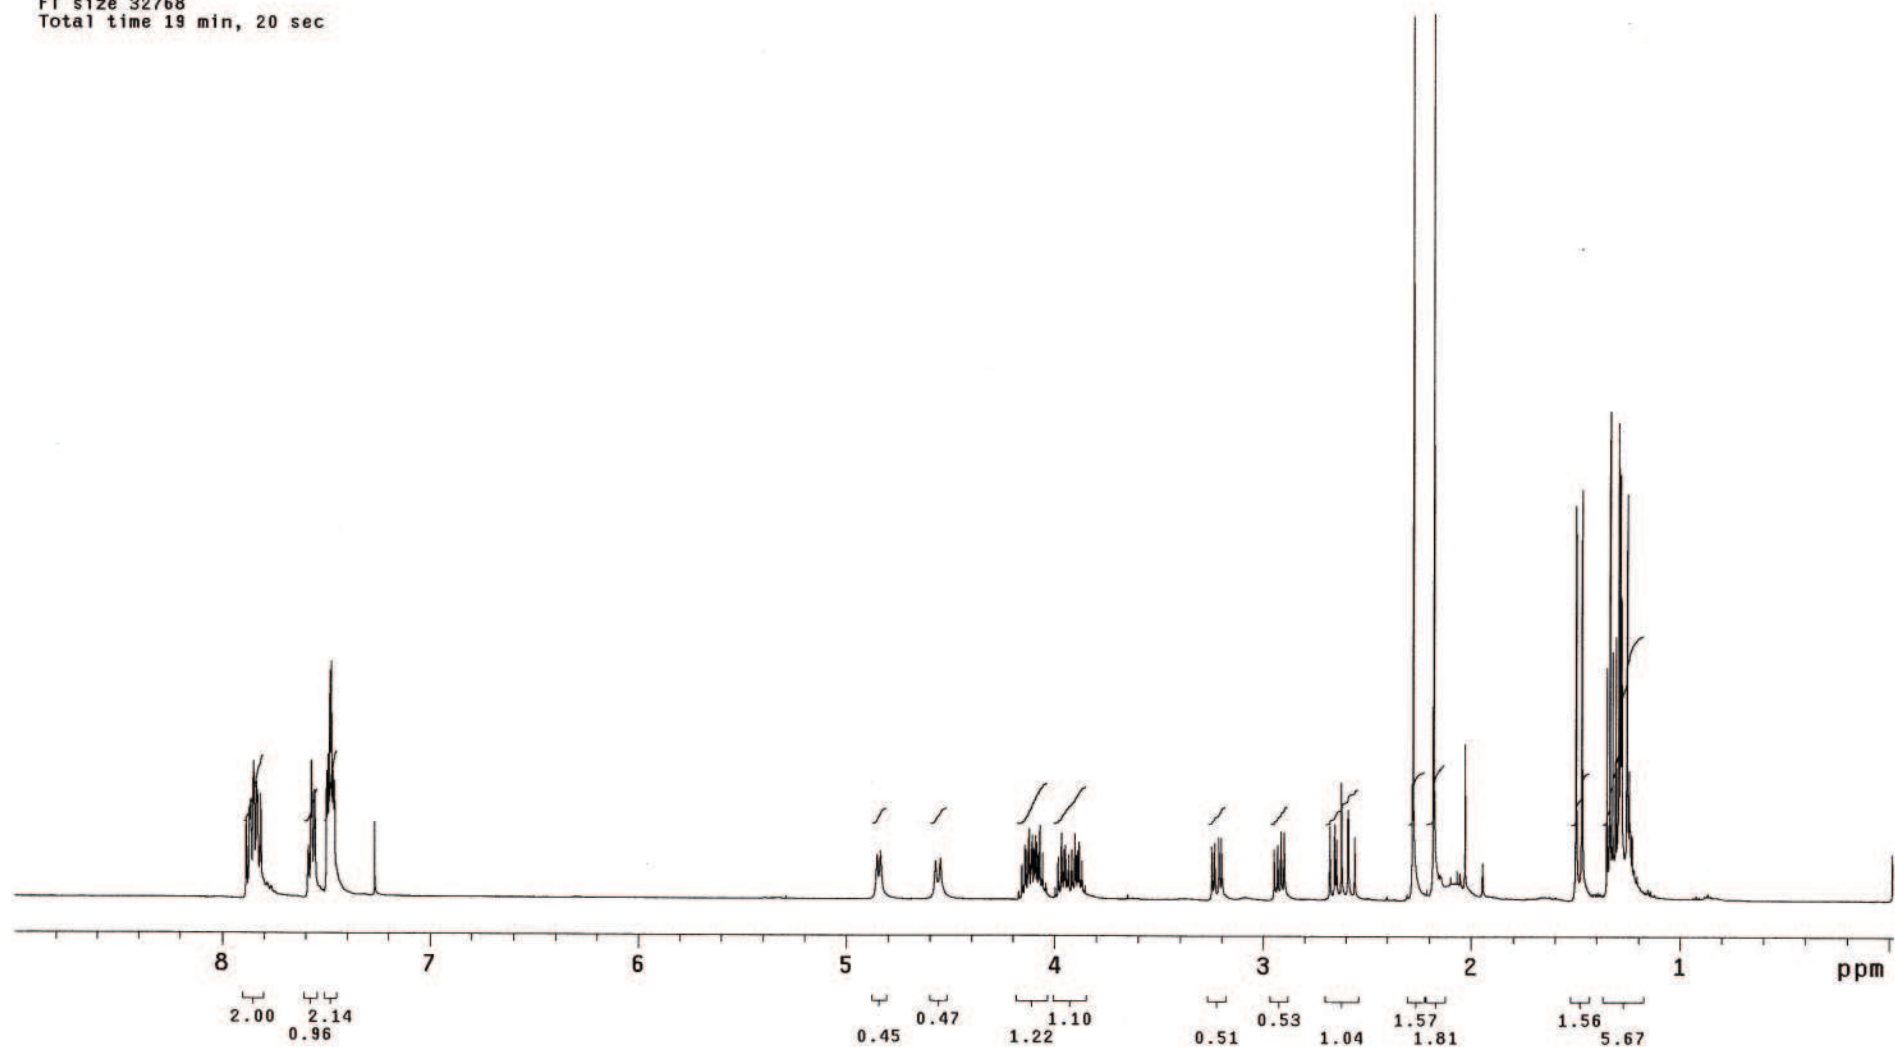

STANDARD CARBON PARAMETERS  
v-ss-113c

Archive directory: /home/samanta/vnmrsys/data  
Sample directory:

Pulse Sequence: s2pu1

Solvent: CDC13  
Ambient temperature  
User: 1-14-87  
File: v-ss-113c  
INOVA-500 "Inova500"

Relax. delay 1.000 sec  
Pulse 45.0 degrees  
Acq. time 1.300 sec  
Width 31409.5 Hz  
22000 repetitions  
OBSERVE C13, 125.6479222 MHz  
DECOUPLE H1, 499.6956872 MHz  
Power 36 dB  
continuously on  
WALTZ-16 modulated  
DATA PROCESSING  
Line broadening 0.5 Hz  
FT size 131072  
Total time 14 hr, 6 min, 46 sec

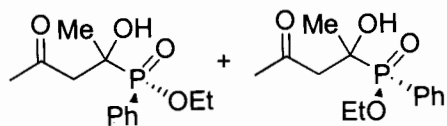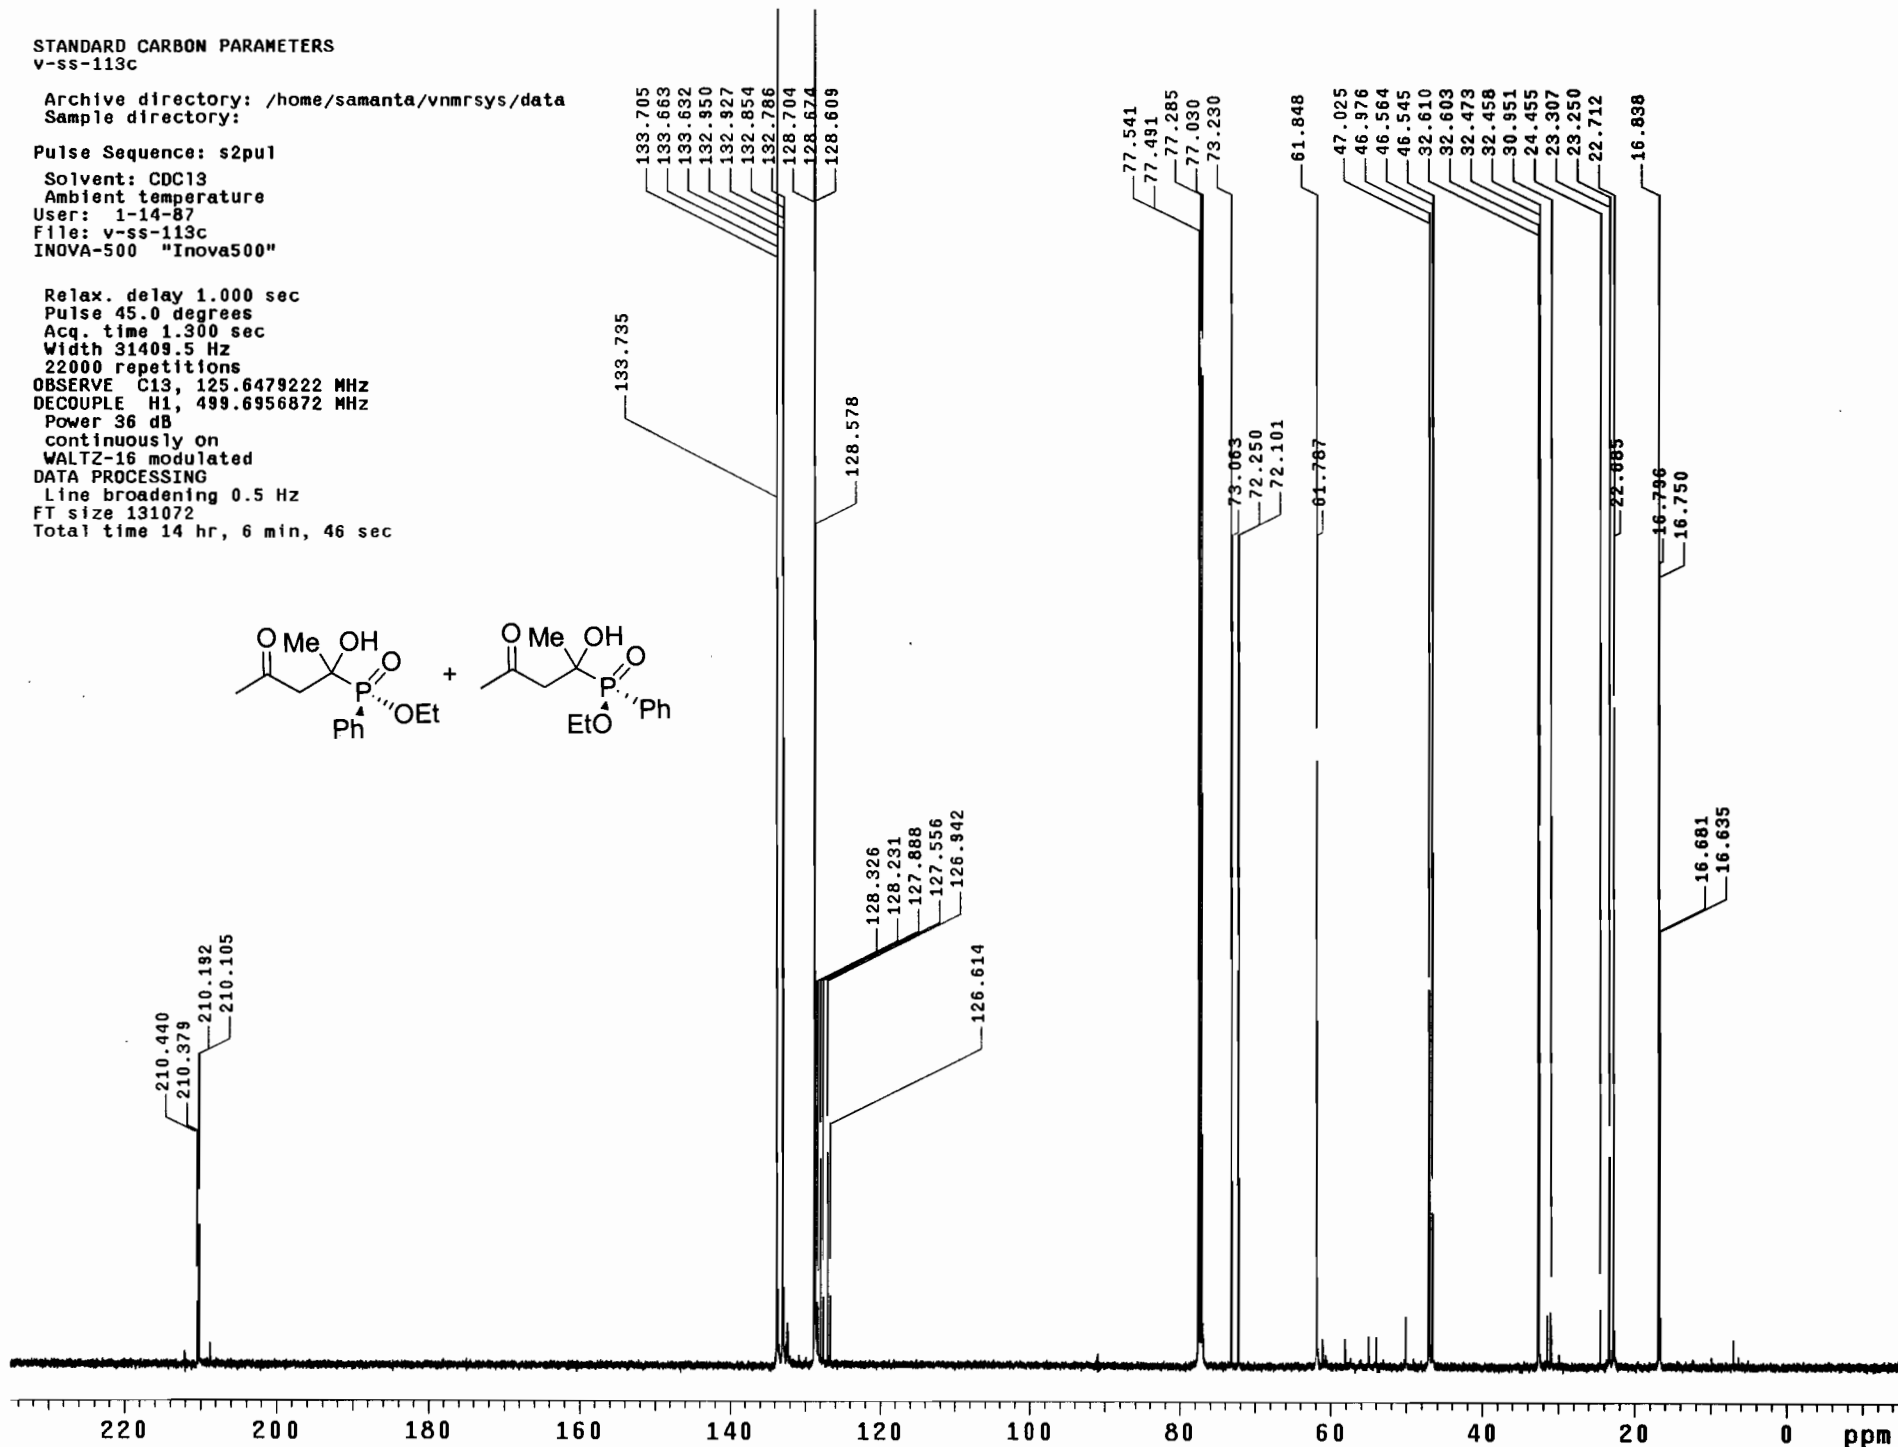

exp3 s2pu1

| SAMPLE              |                | SPECIAL    |          |
|---------------------|----------------|------------|----------|
| date                | Nov 24 2009    | temp       | not used |
| solvent             | D2O            | gain       | not used |
| file                | /export2/home~ | spin       | not used |
| /sperera/3-sp-1P31~ |                | hst        | 0.008    |
| .fid                |                | pw90       | 8.300    |
| alfa                |                |            | 10.000   |
| ACQUISITION         |                | FLAGS      |          |
| sw                  | 40140.5        |            |          |
| at                  | 1.600          | il         | n        |
| np                  | 128450         | in         | n        |
| fb                  | 22000          | dp         | y        |
| bs                  | 64             | hs         | ny       |
| d1                  | 1.000          | PROCESSING |          |
| nt                  | 4              | lb         | 1.00     |
| ct                  | 4              | fn         | not used |
| TRANSMITTER         |                | DISPLAY    |          |
| tn                  | P31            | sp         | -93.7    |
| sfrq                | 202.254        | wp         | 16287.7  |
| tof                 | 5050.4         | rfl        | 20140.4  |
| tpwr                | 54             | rffp       | 0        |
| pw                  | 3.228          | rp         | 115.1    |
|                     |                | lp         | -1152.0  |
| DECOUPLER           |                | PLOT       |          |
| dn                  | H1             |            |          |
| dof                 | 0              | wc         | 250      |
| dm                  | yyy            | sc         | 0        |
| dmm                 | w              | vs         | 162      |
| dpwr                | 36             | th         | 91       |
| dmf                 | 10954          | nm         | cdc ph   |

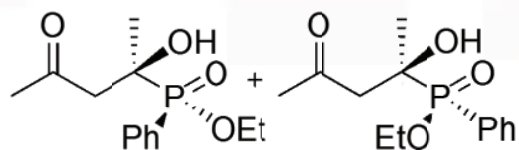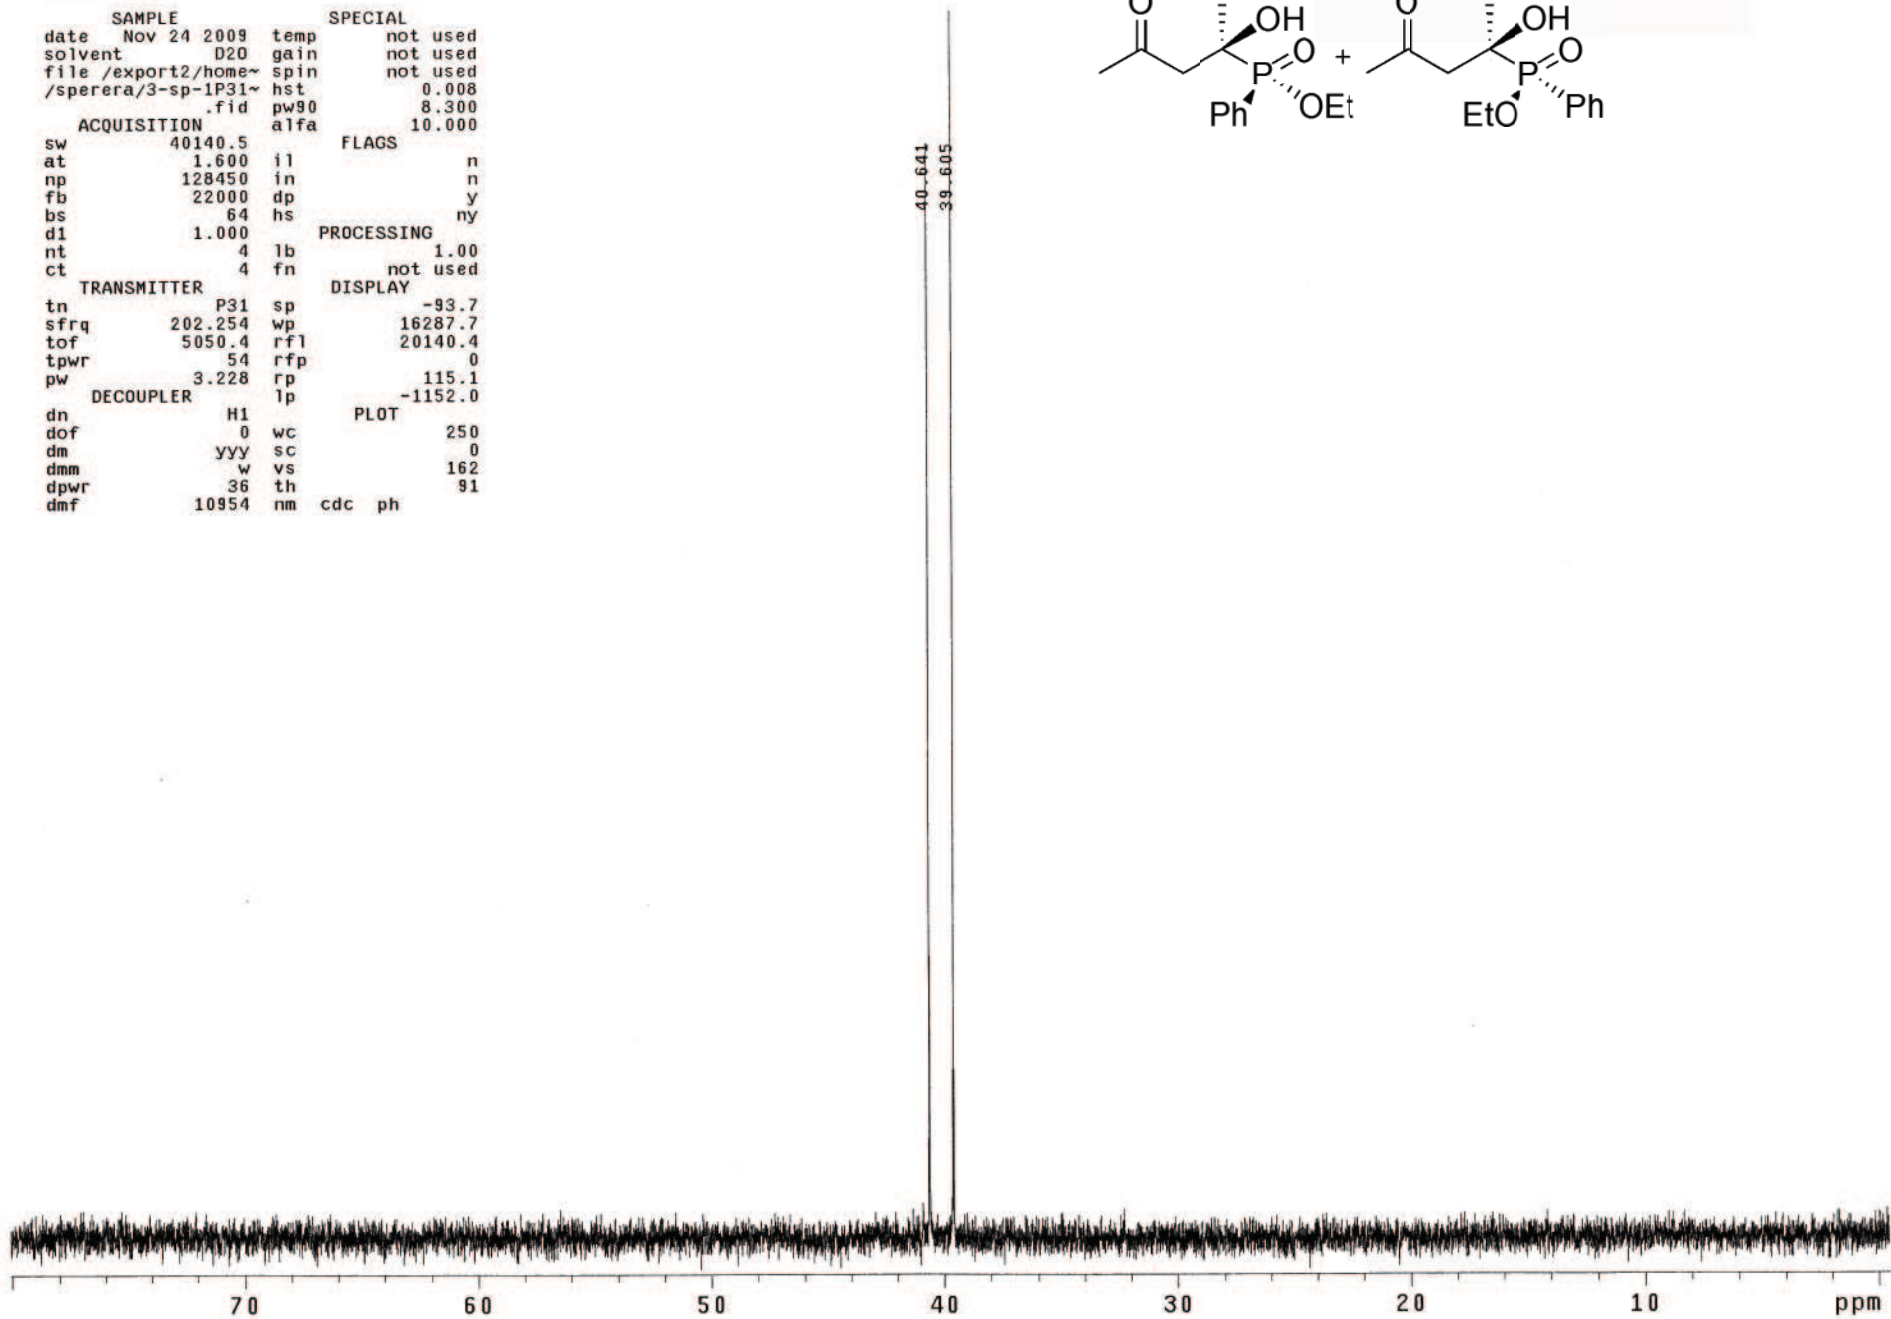

Archive directory: /export/home/vnmr1/vnmrsys/data  
Sample directory:  
File: PROTON

Pulse Sequence: s2pul  
Solvent: CDC13  
Ambient temperature  
INOVA-500 "Inova500"

Relax. delay 1.000 sec  
Pulse 24.5 degrees  
Acq. time 1.892 sec  
Width 7995.2 Hz  
64 repetitions  
OBSERVE H1, 499.6391196 MHz  
DATA PROCESSING  
FT size 32768  
Total time 3 min, 5 sec

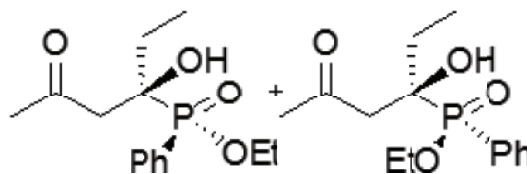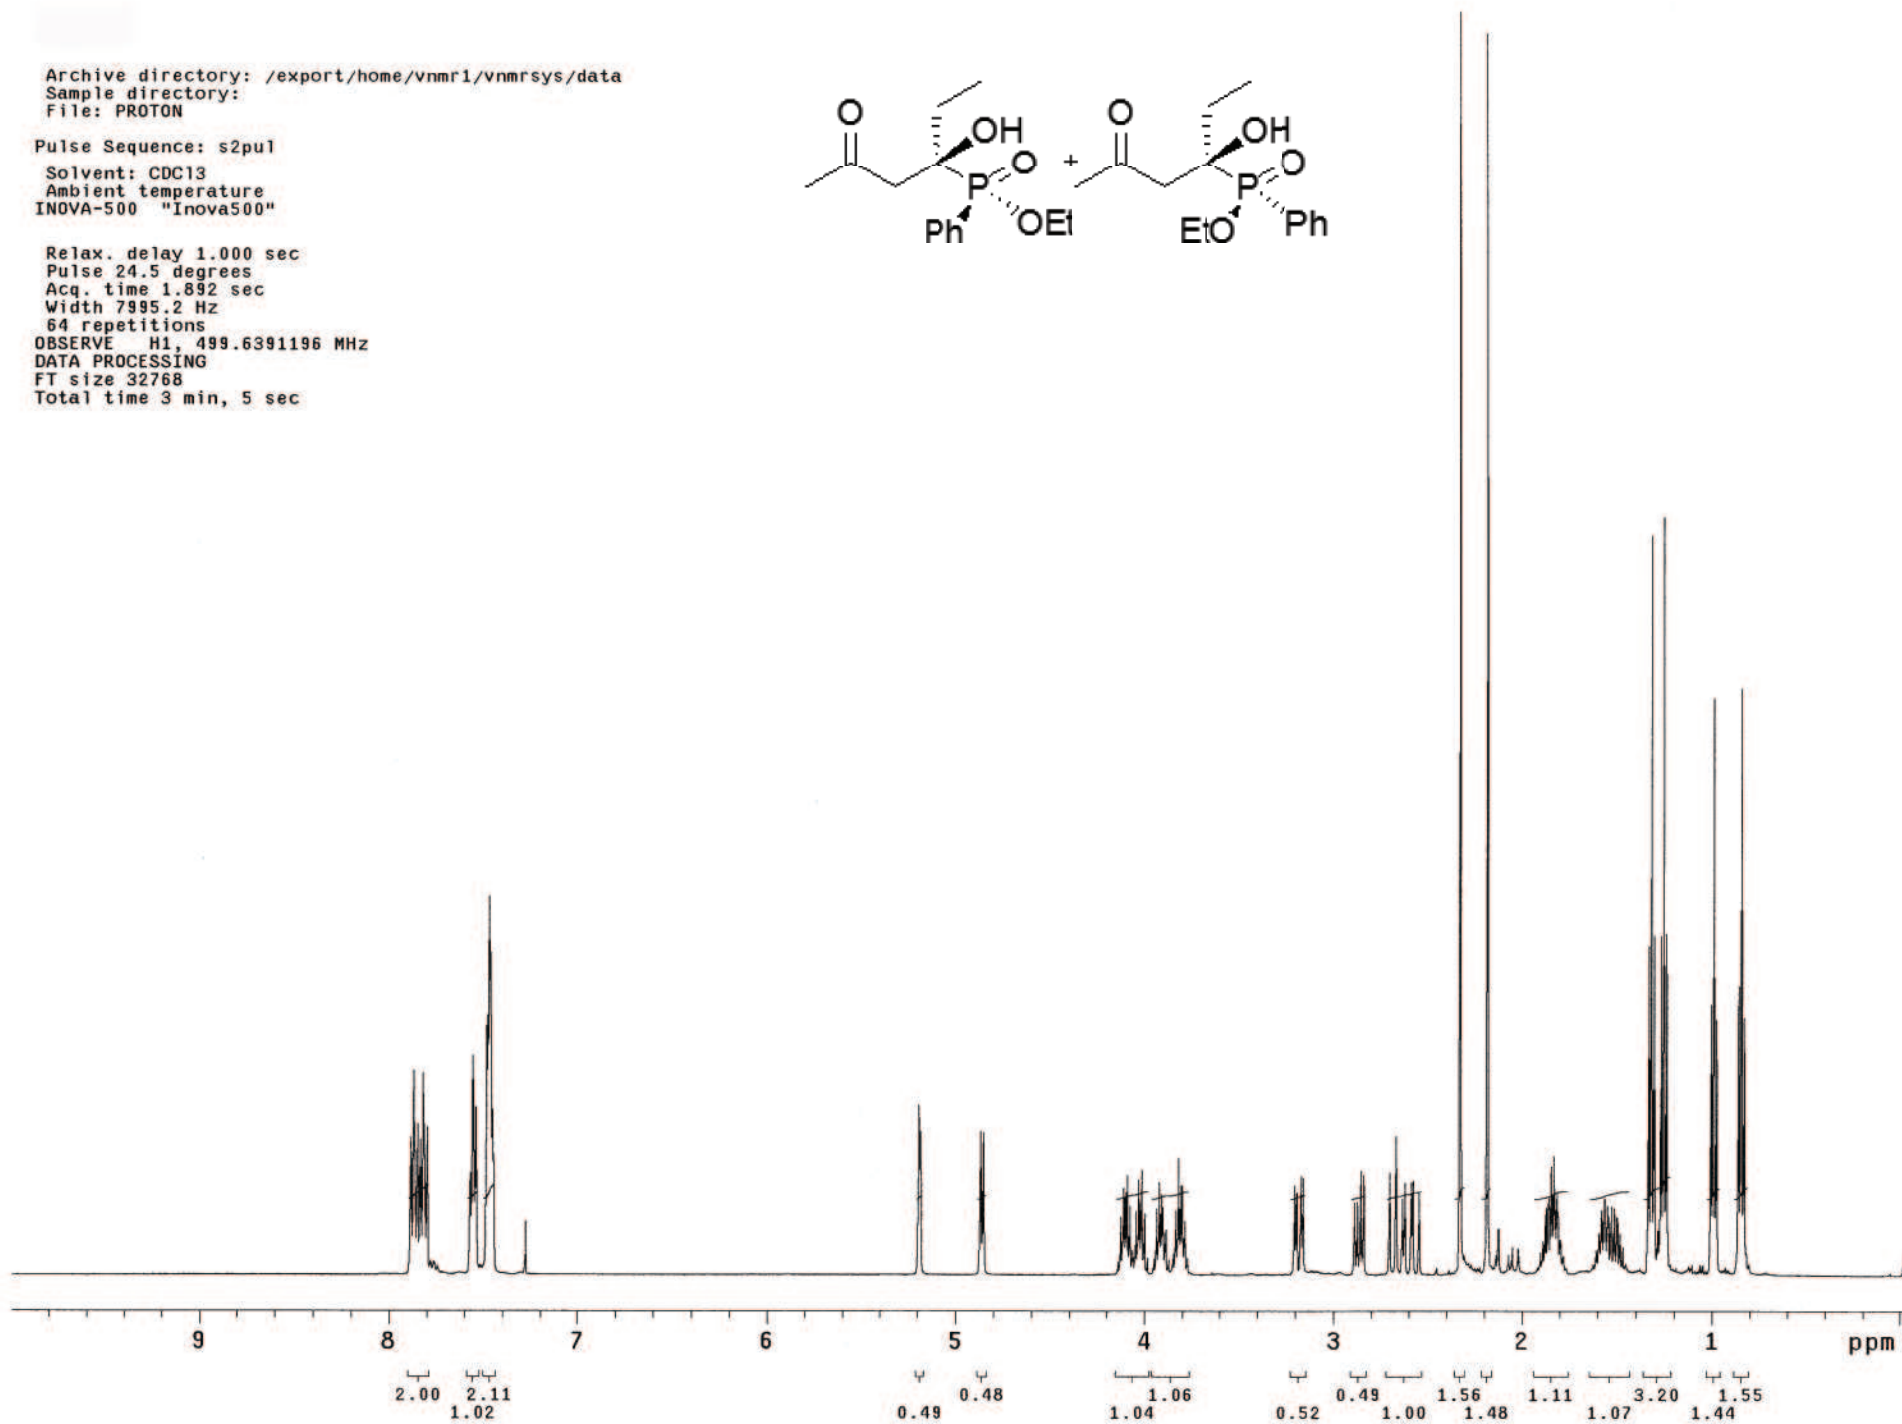

STANDARD CARBON PARAMETERS  
v-ss-119carbon

Archive directory: /home/samanta/vnmr/sys/data  
Sample directory:

Pulse Sequence: s2pu1

Solvent: CDC13  
Ambient temperature  
User: 1-14-87  
File: v-ss-119carbon  
INOVA-500 "Inova500"

Relax. delay 1.000 sec  
Pulse 45.0 degrees  
Acq. time 1.300 sec  
Width 31409.5 Hz  
20000 repetitions  
OBSERVE C13, 125.6479222 MHz  
DECOUPLE H1, 499.6956872 MHz  
Power 36 dB  
continuously on  
WALTZ-16 modulated  
DATA PROCESSING  
Line broadening 0.5 Hz  
FT size 131072  
Total time 12 hr, 49 min, 47 sec

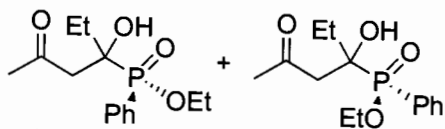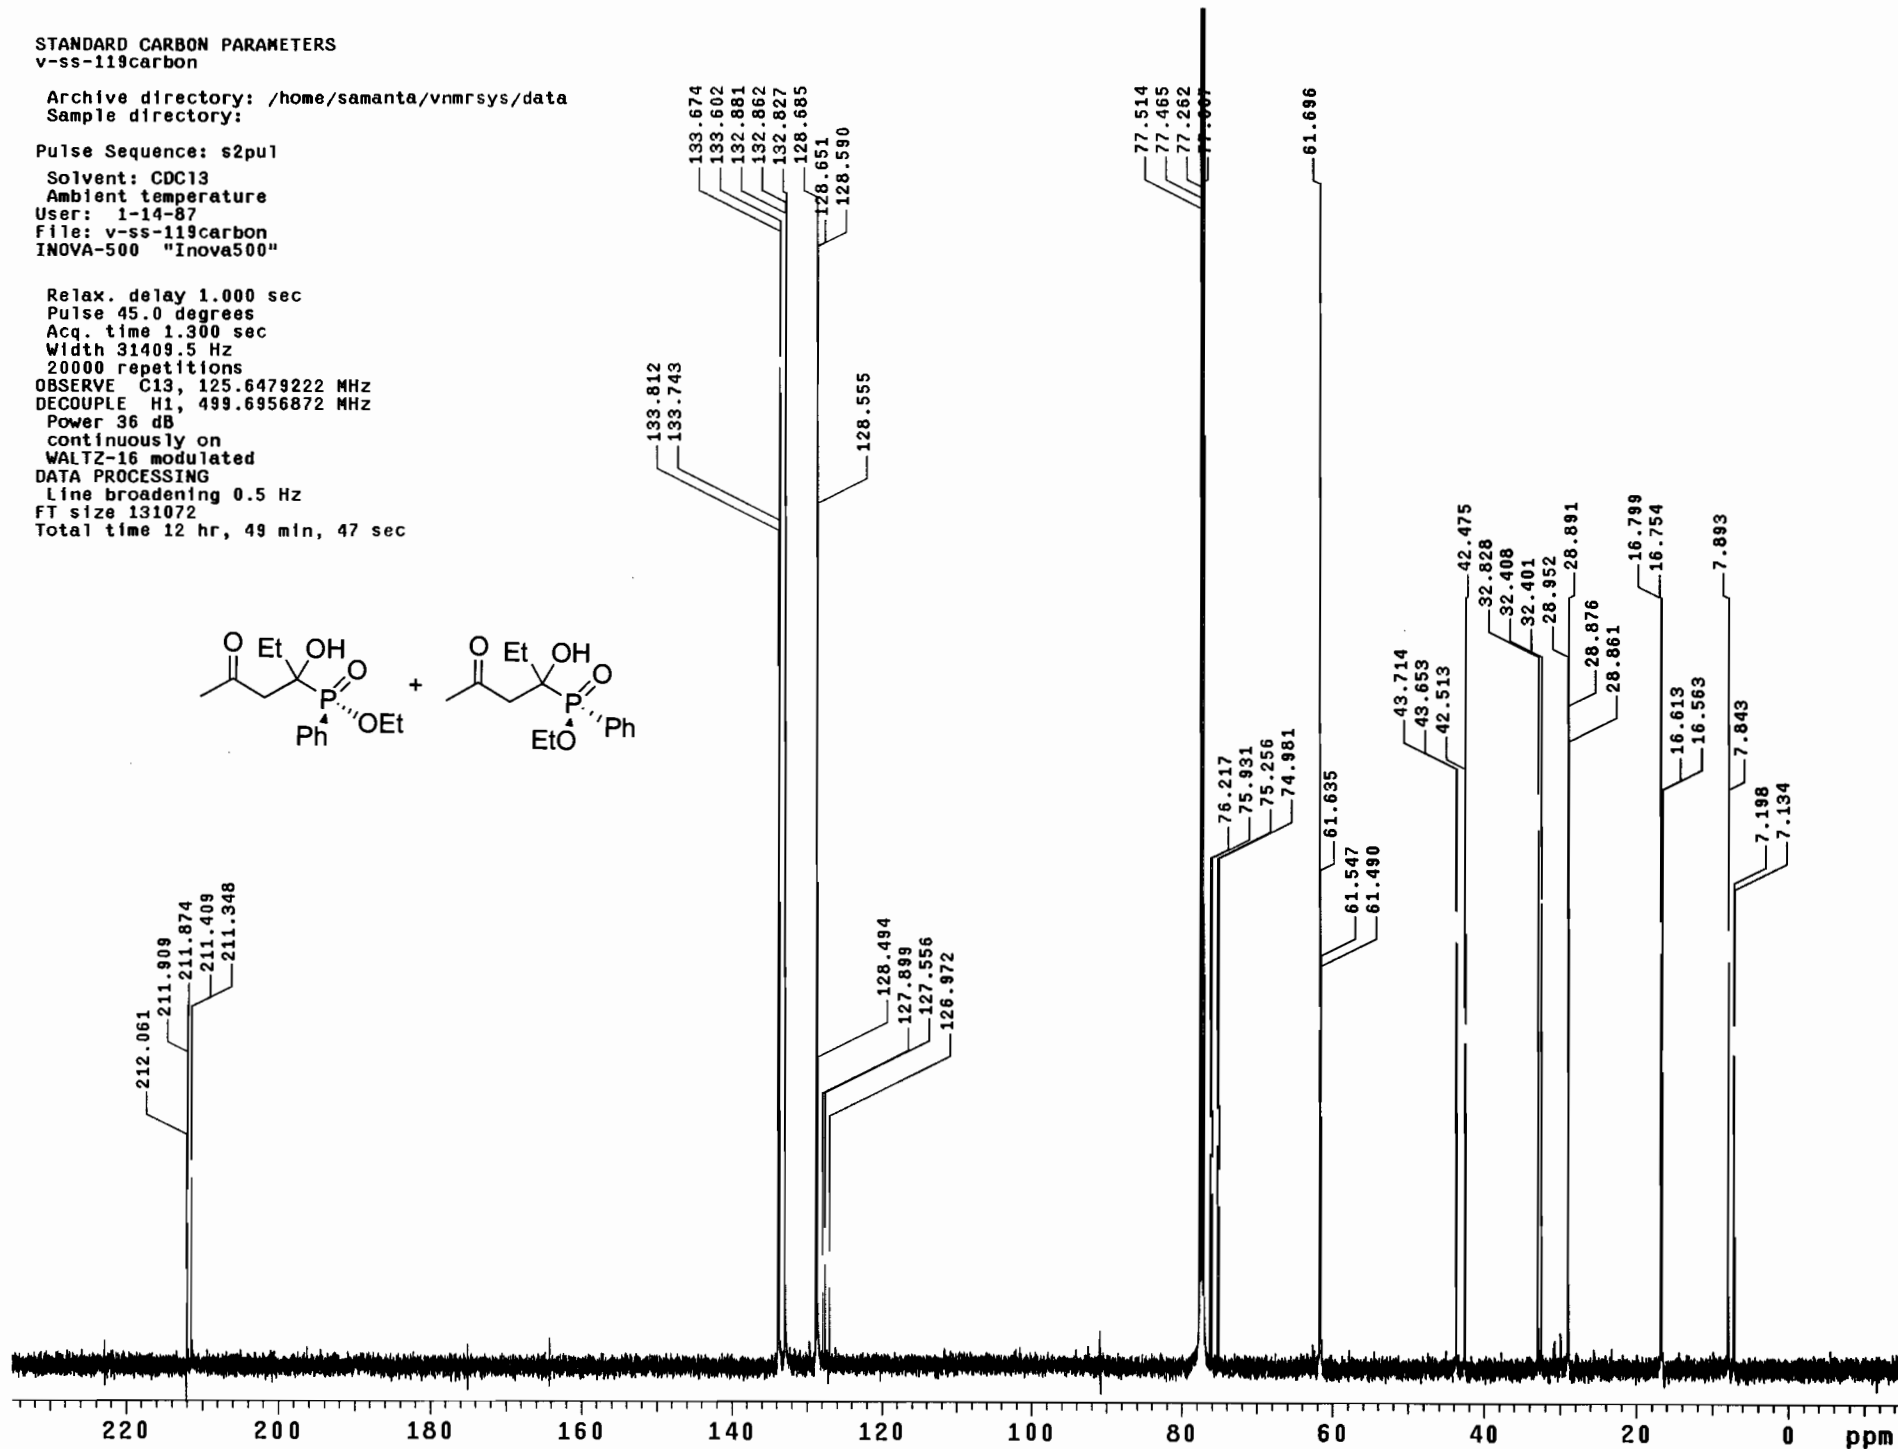

exp3 s2pu1

| SAMPLE      |             | SPECIAL    |          |
|-------------|-------------|------------|----------|
| date        | Nov 24 2009 | temp       | not used |
| solvent     | D2O         | gain       | not used |
| file        | exp         | spin       | not used |
| ACQUISITION |             | SPECIAL    |          |
| sw          | 40140.5     | hst        | 0.008    |
| at          | 1.600       | pw90       | 8.300    |
| np          | 128450      | alfa       | 10.000   |
| fb          | 22000       | FLAGS      |          |
| bs          | 64          | il         | n        |
| d1          | 1.000       | in         | n        |
| nt          | 4           | dp         | y        |
| ct          | 4           | hs         | ny       |
| TRANSMITTER |             | PROCESSING |          |
| tn          | P31         | lb         | 1.00     |
| sfrq        | 202.254     | fn         | not used |
| tof         | 5050.4      | DISPLAY    |          |
| tpwr        | 54          | sp         | -1.2     |
| pw          | 3.228       | wp         | 12204.2  |
| DECOUPLER   |             | rfl        | 20140.4  |
| dn          | H1          | rfp        | 0        |
| dof         | 0           | rp         | 120.2    |
| dm          | YYY         | lp         | -1152.0  |
| dmm         | 36          | PLOT       |          |
| dpwr        | 10954       | wc         | 250      |
| dmf         |             | sc         | 0        |
|             |             | vs         | 104      |
|             |             | th         | 81       |
|             |             | nm         | cdc ph   |

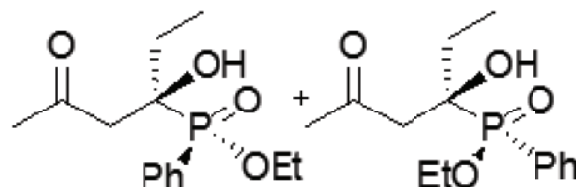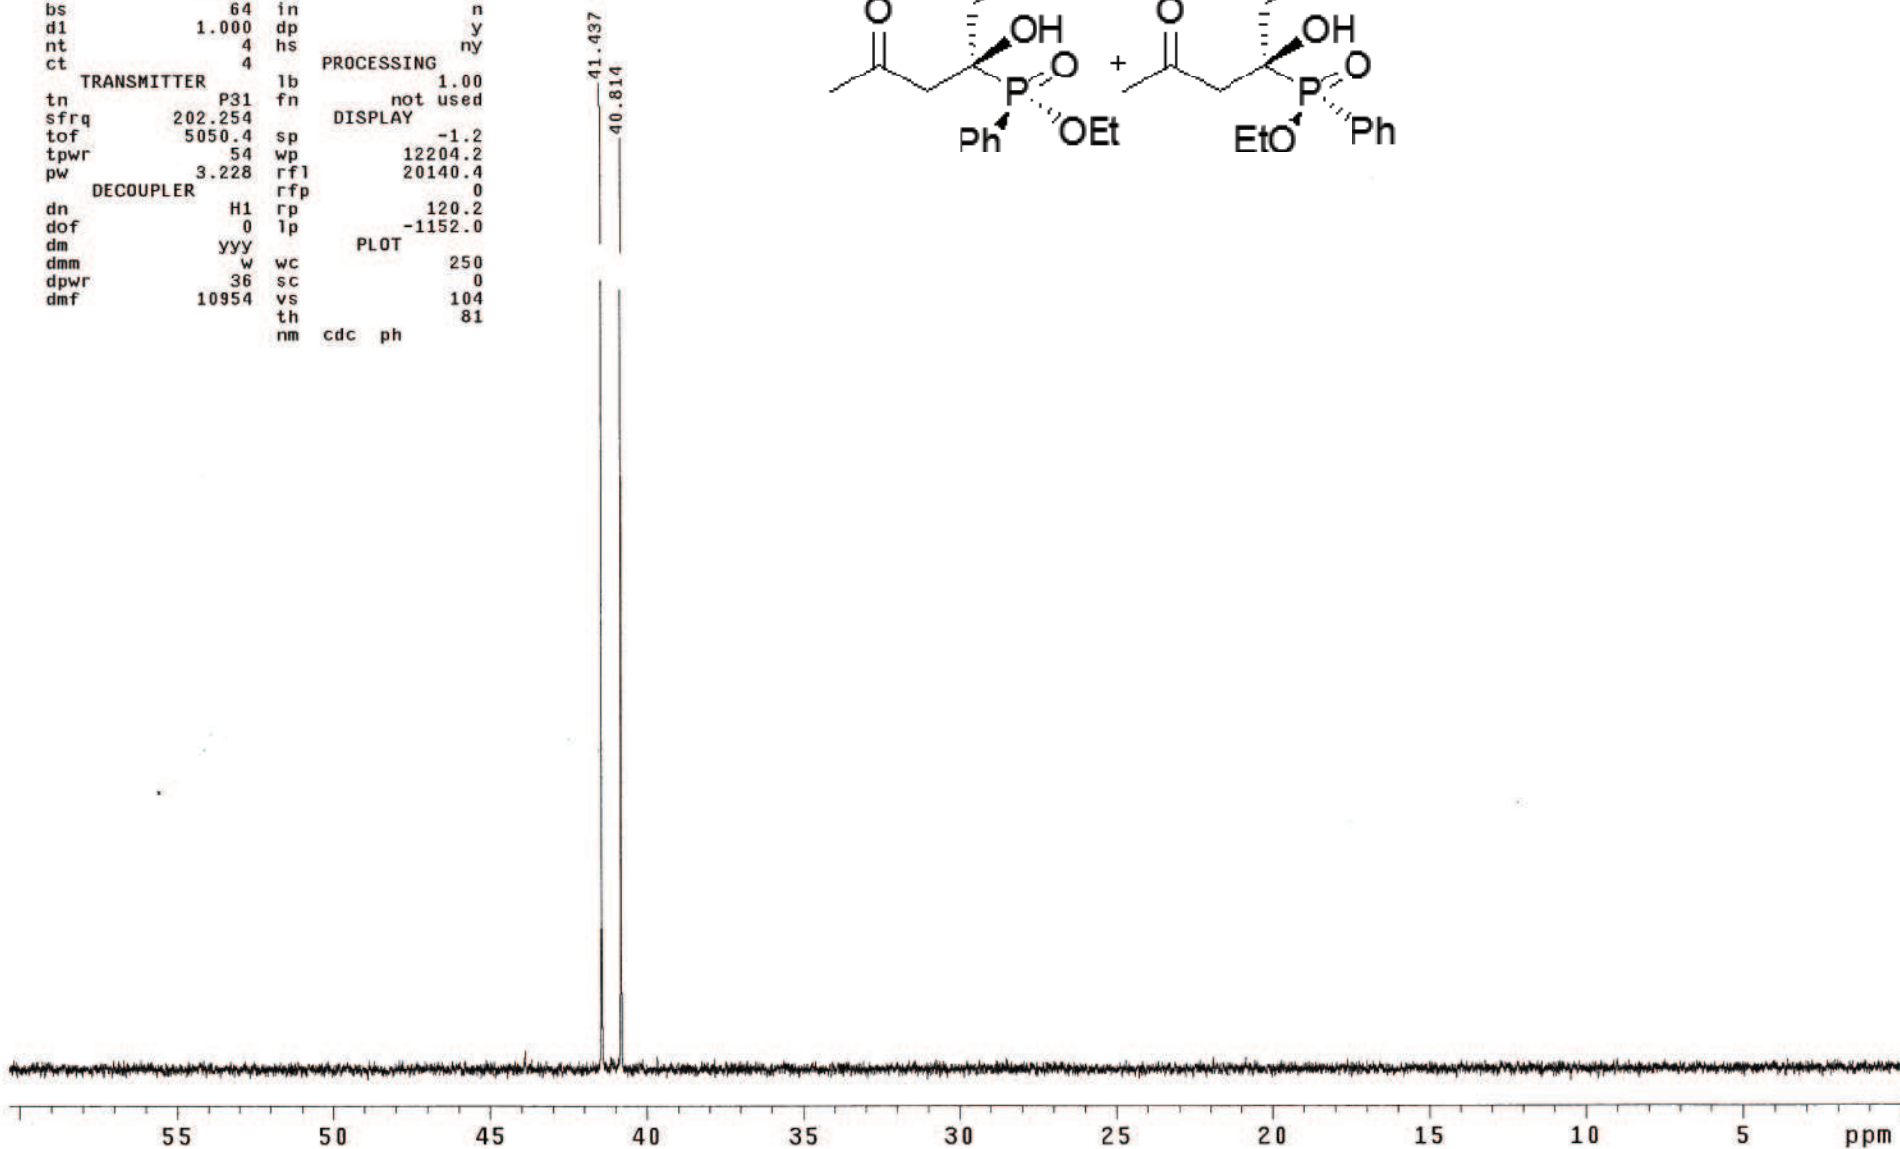

STANDARD PROTON PARAMETERS  
VI-SS-31

Archive directory: /home/samanta/vnmrsys/data  
Sample directory:

Pulse Sequence: s2pu1  
Solvent: CDC13  
Ambient temperature  
File: VI-SS-31  
INOVA-500 "Inova500"

Relax. delay 1.000 sec  
Pulse 45.0 degrees  
Acq. time 1.892 sec  
Width 7995.2 Hz  
8 repetitions  
OBSERVE H1, 499.6847200 MHz  
DATA PROCESSING  
FT size 32768  
Total time 0 min, 23 sec

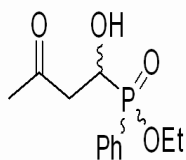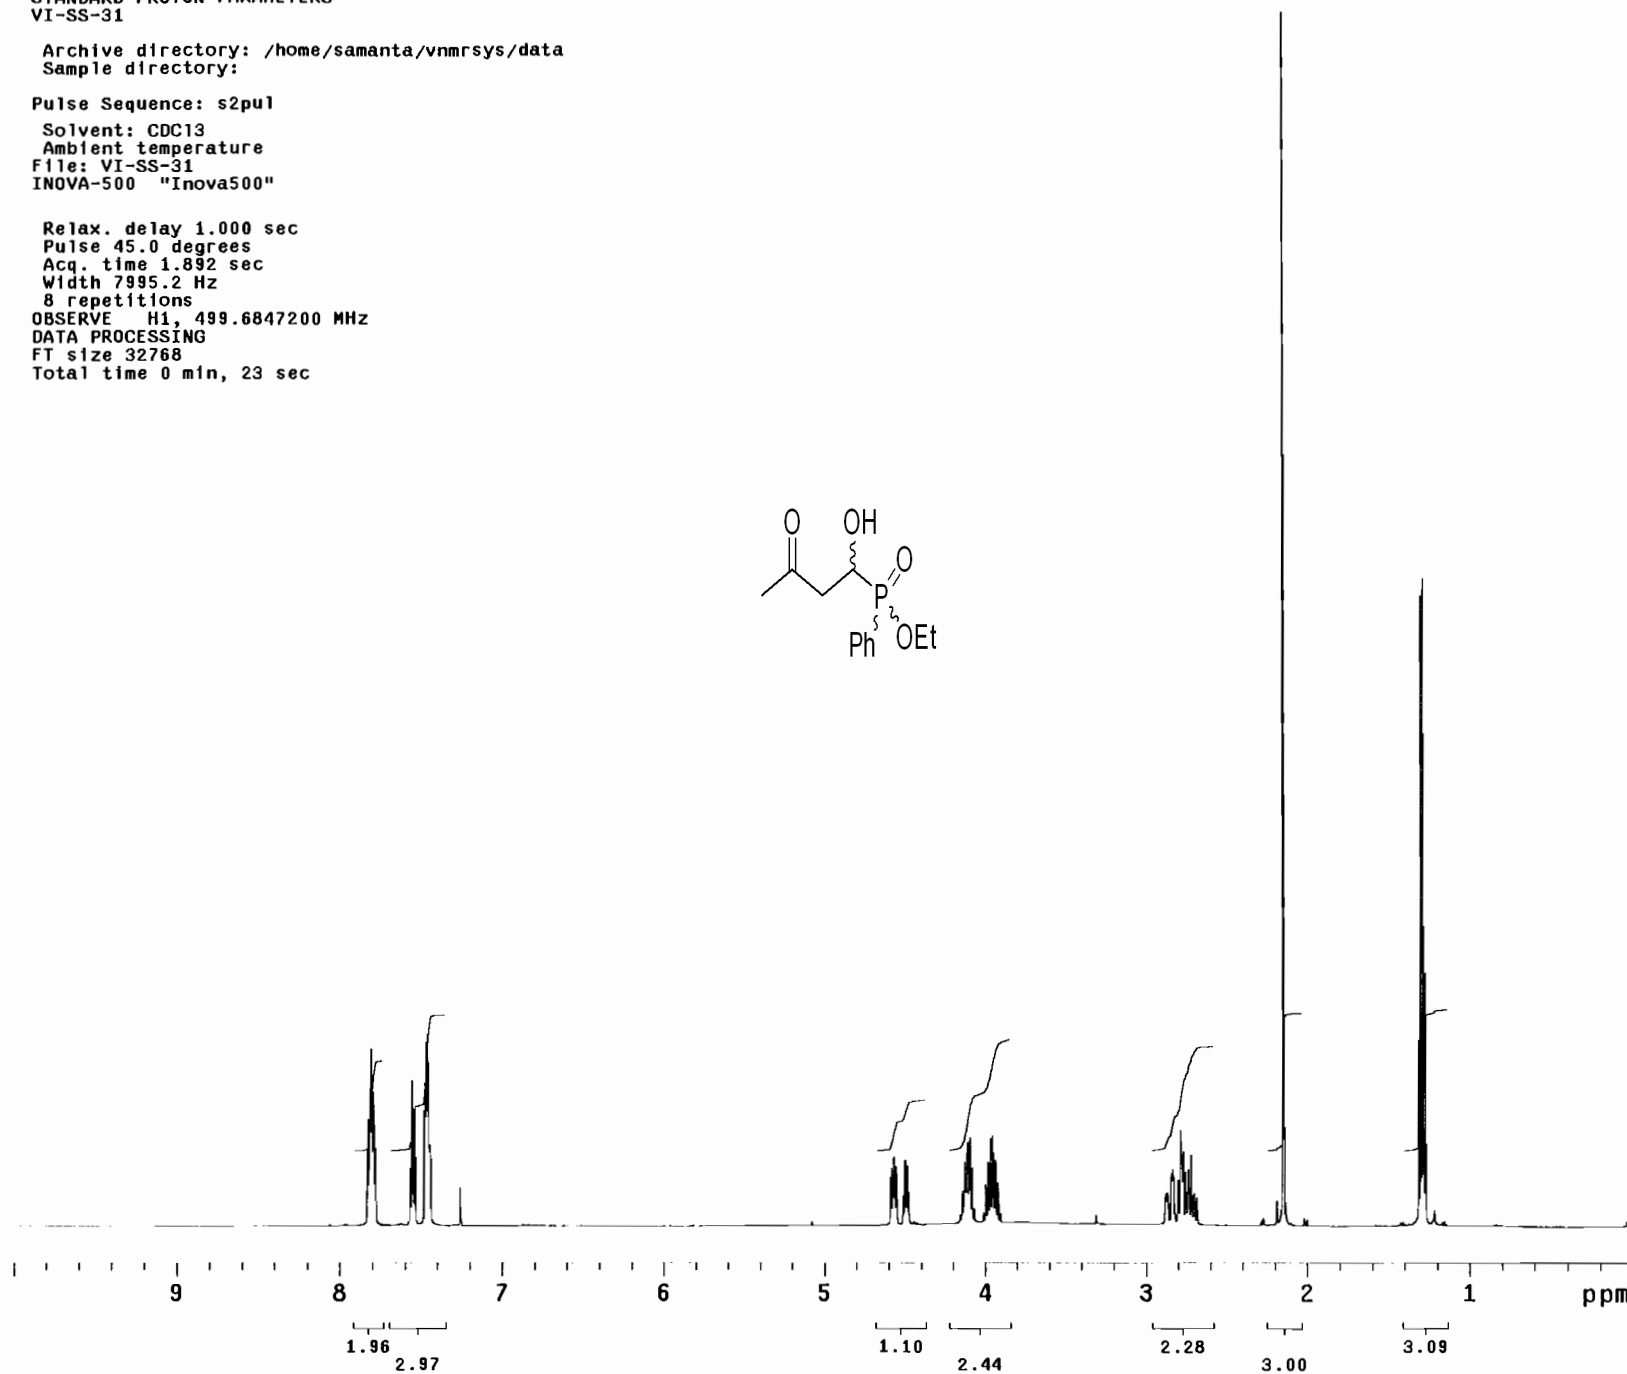

STANDARD CARBON PARAMETERS  
VI-SS-31c

Archive directory: /home/samanta/vnmrsys/data  
Sample directory:

Pulse Sequence: s2pu1

Solvent: CDC13  
Ambient temperature  
User: 1-14-87  
File: VI-SS-31carbon  
INOVA-500 "Inova500"

Relax. delay 1.000 sec  
Pulse 45.0 degrees  
Acq. time 1.300 sec  
Width 31409.5 Hz  
8000 repetitions  
OBSERVE C13, 125.6457928 MHz  
DECOUPLE H1, 499.6872185 MHz  
Power 36 dB  
continuously on  
WALTZ-16 modulated  
DATA PROCESSING  
Line broadening 0.5 Hz  
FT size 131072  
Total time 5 hr, 7 min, 54 sec

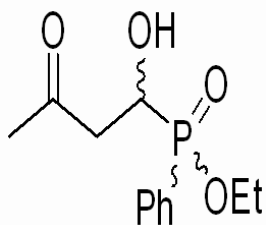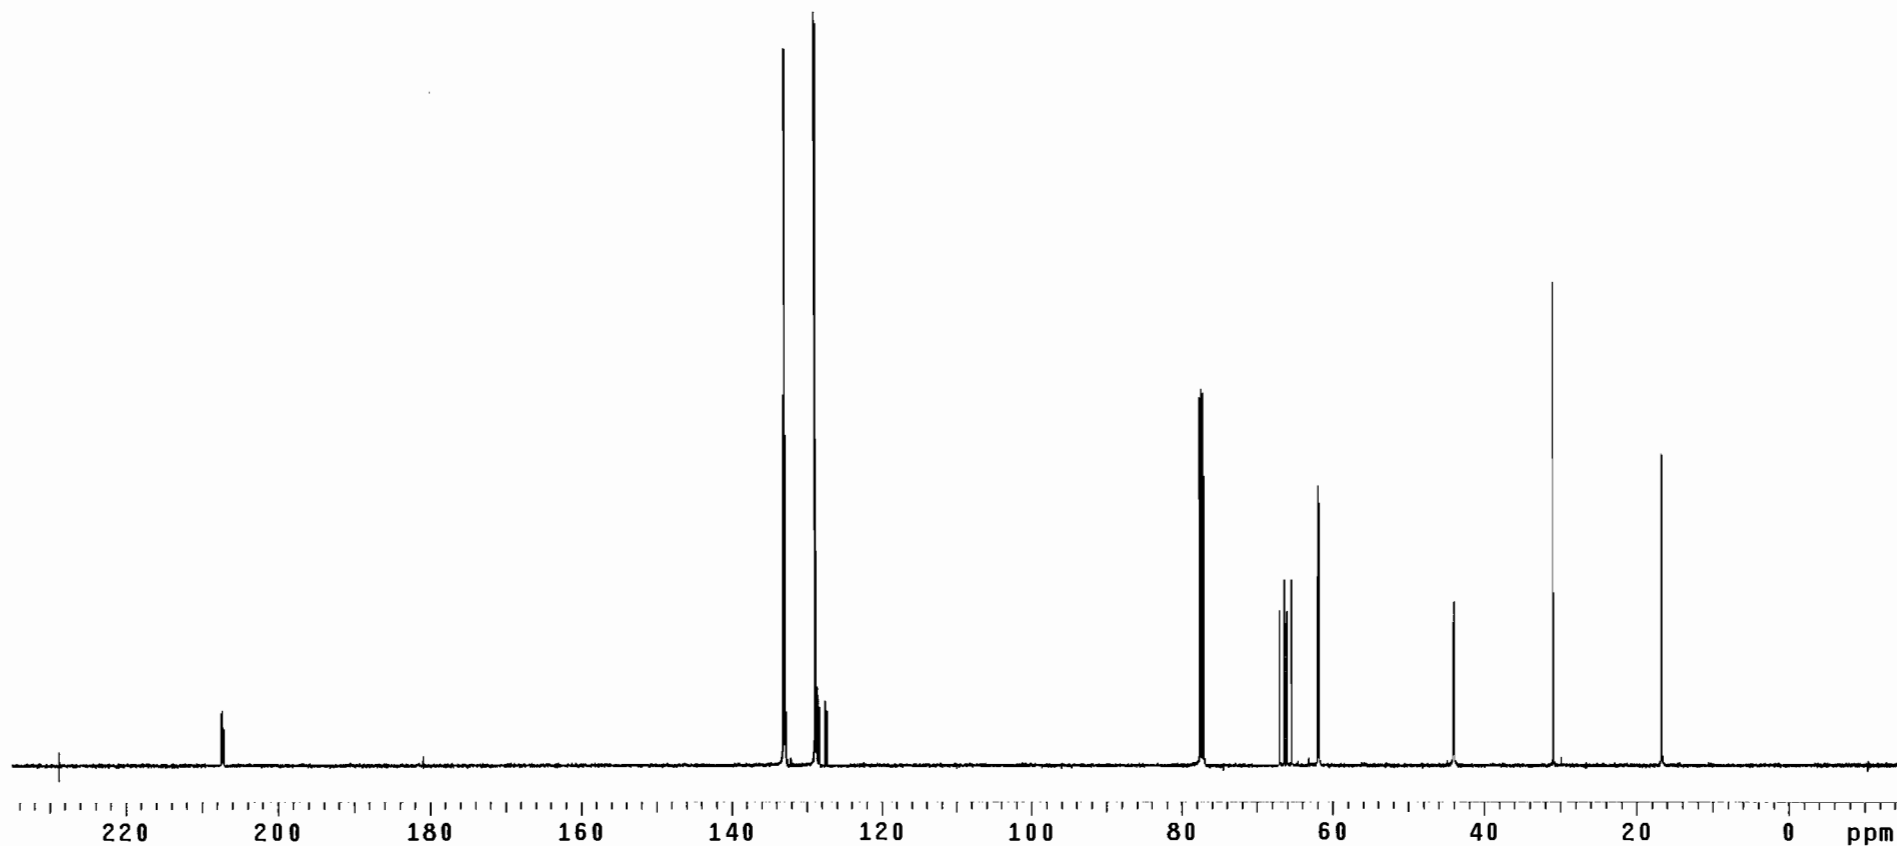



expi s2pu1

```
SAMPLE          DEC. & VT
date    Dec 30 2009  dfrq      499.632
solvent  CDC13      dn        h1
file     exp        dpwr      35
          ACQUISITION  dof        0
sfrq    202.258    dm         nny
tn       P31       dnm        w
at       1.600     dmf       10954
np       64000     dseq
sw       20000.0   dres      1.0
fb       11000    homo      n
tpwr     54       temp     25.0
pw       4.0      PROCESSING
dl       5.000    lb        1.00
tof      9000.0   utfile
nt       8        proc      ft
ct       8        fn        not used
alock    n        math      f
gain     not used
          FLAGS
ll       n        werr
ln       n        wexp
dp       y        wbs
hs       ny       wnt
          DISPLAY
sp       -396.7
wp       10484.5
vs       80
sc       0
wc       250
hzmm     41.94
js       500.00
rf1      6186.7
rfp      0
th       24
lms     100.000
nm      cdc ph
```

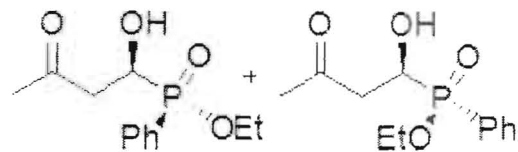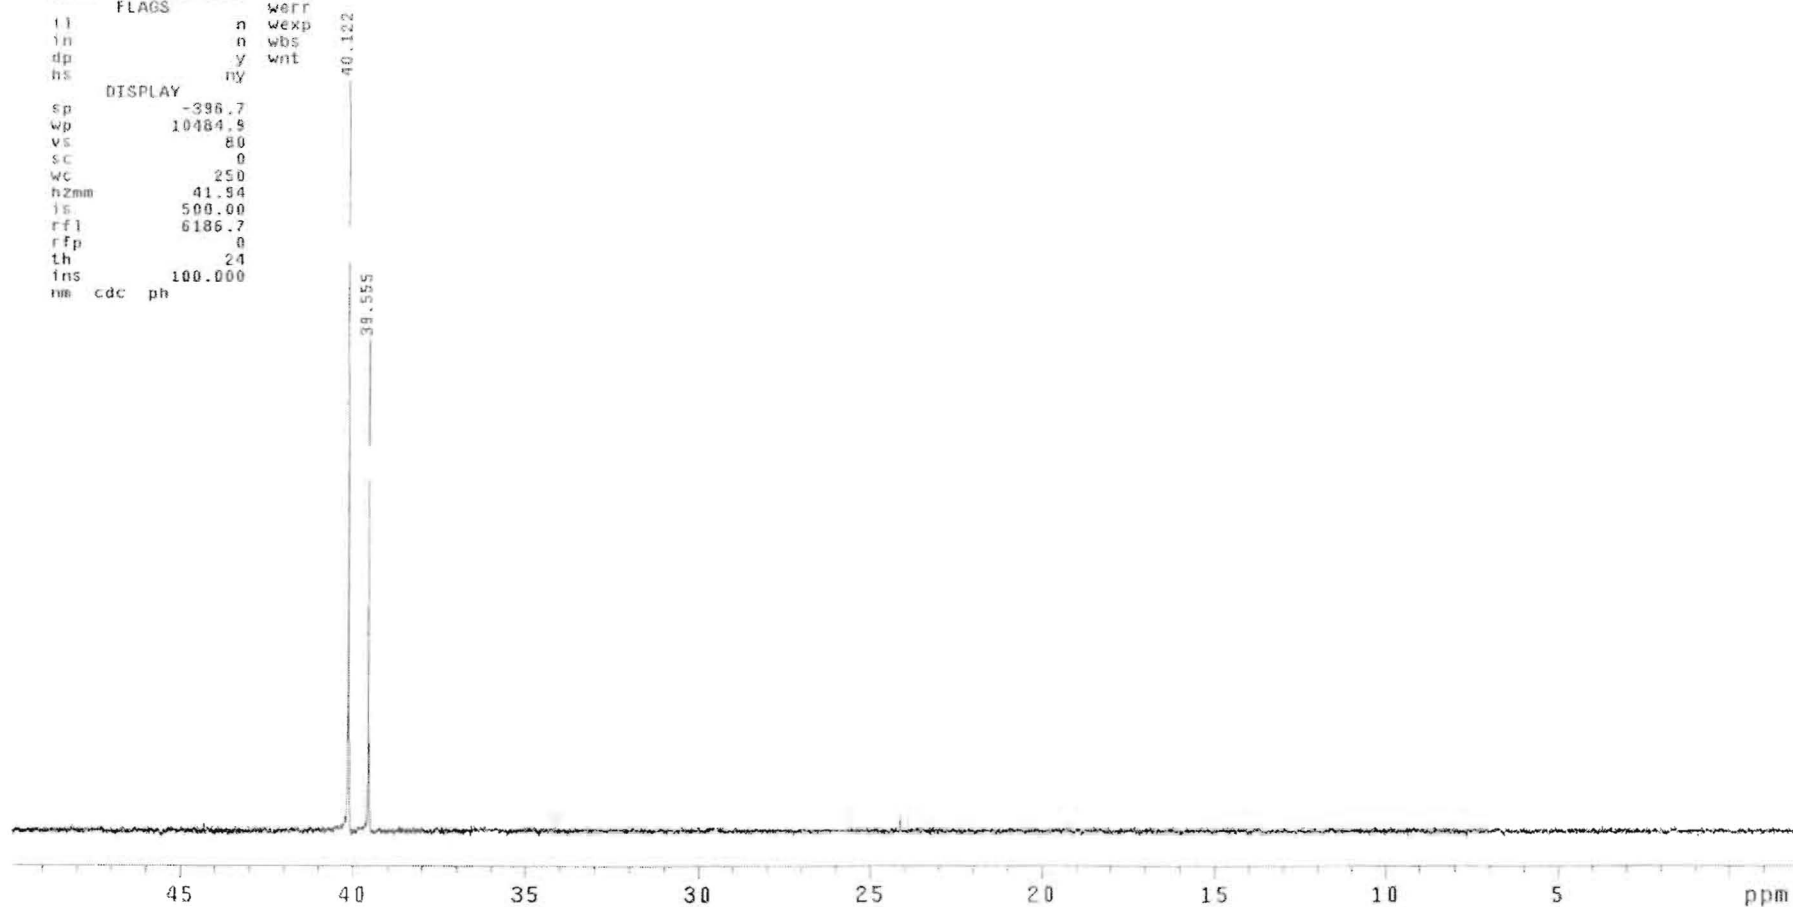

STANDARD PROTON PARAMETERS

Archive directory: /export/home/vnmr1/vnmrsys/data  
 Sample directory:  
 File: PROTON

Pulse Sequence: s2pu1  
 Solvent: CDC13  
 Ambient temperature  
 INOVA-500 "Inova500"

Relax. delay 1.000 sec  
 Pulse 24.5 degrees  
 Acq. time 1.892 sec  
 Width 7995.2 Hz  
 32 repetitions  
 OBSERVE H1, 499.6299995 MHz  
 DATA PROCESSING  
 FT size 32768  
 Total time 1 min, 32 sec

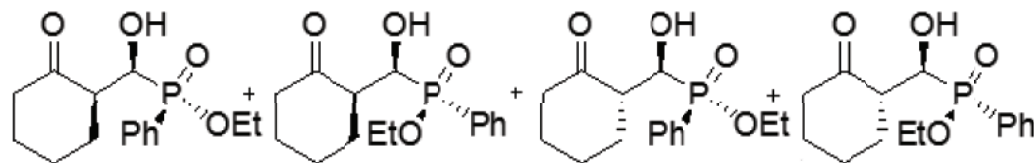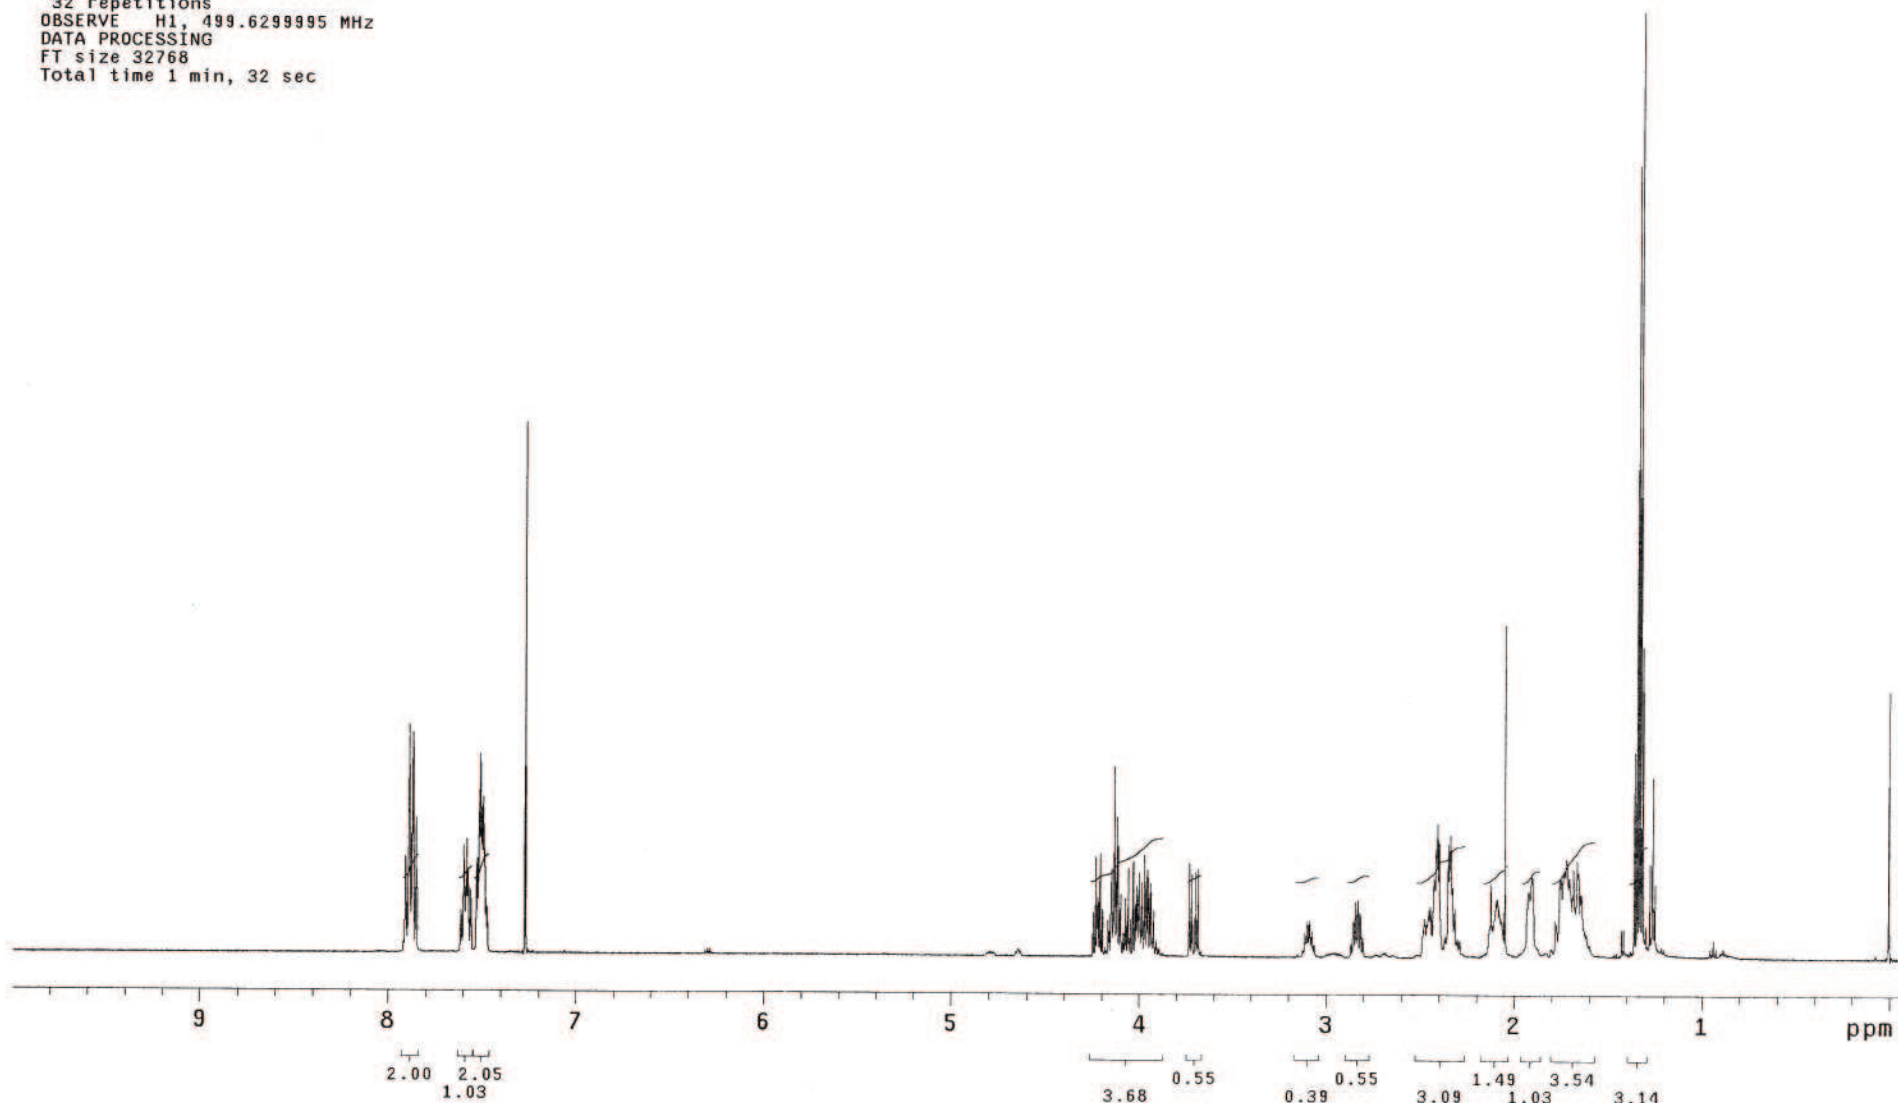

STANDARD CARBON PARAMETERS  
VI-SS-53c

Archive directory: /home/samanta/vnmrsys/data  
Sample directory:

Pulse Sequence: s2pu1

Solvent: CDC13  
Ambient temperature  
User: 1-14-87  
File: VI-SS-53c  
INOVA-500 "Inova500"

Relax. delay 1.000 sec  
Pulse 45.0 degrees  
Acq. time 1.300 sec  
Width 31409.5 Hz  
6900 repetitions  
OBSERVE C13, 125.6457928 MHz  
DECOUPLE H1, 499.6872185 MHz  
Power 36 dB  
continuously on  
WALTZ-16 modulated  
DATA PROCESSING  
Line broadening 0.5 Hz  
FT size 131072  
Total time 4 hr, 25 min, 34 sec

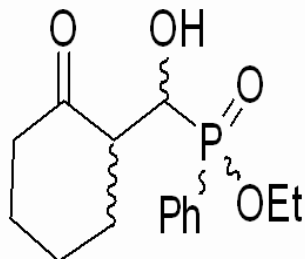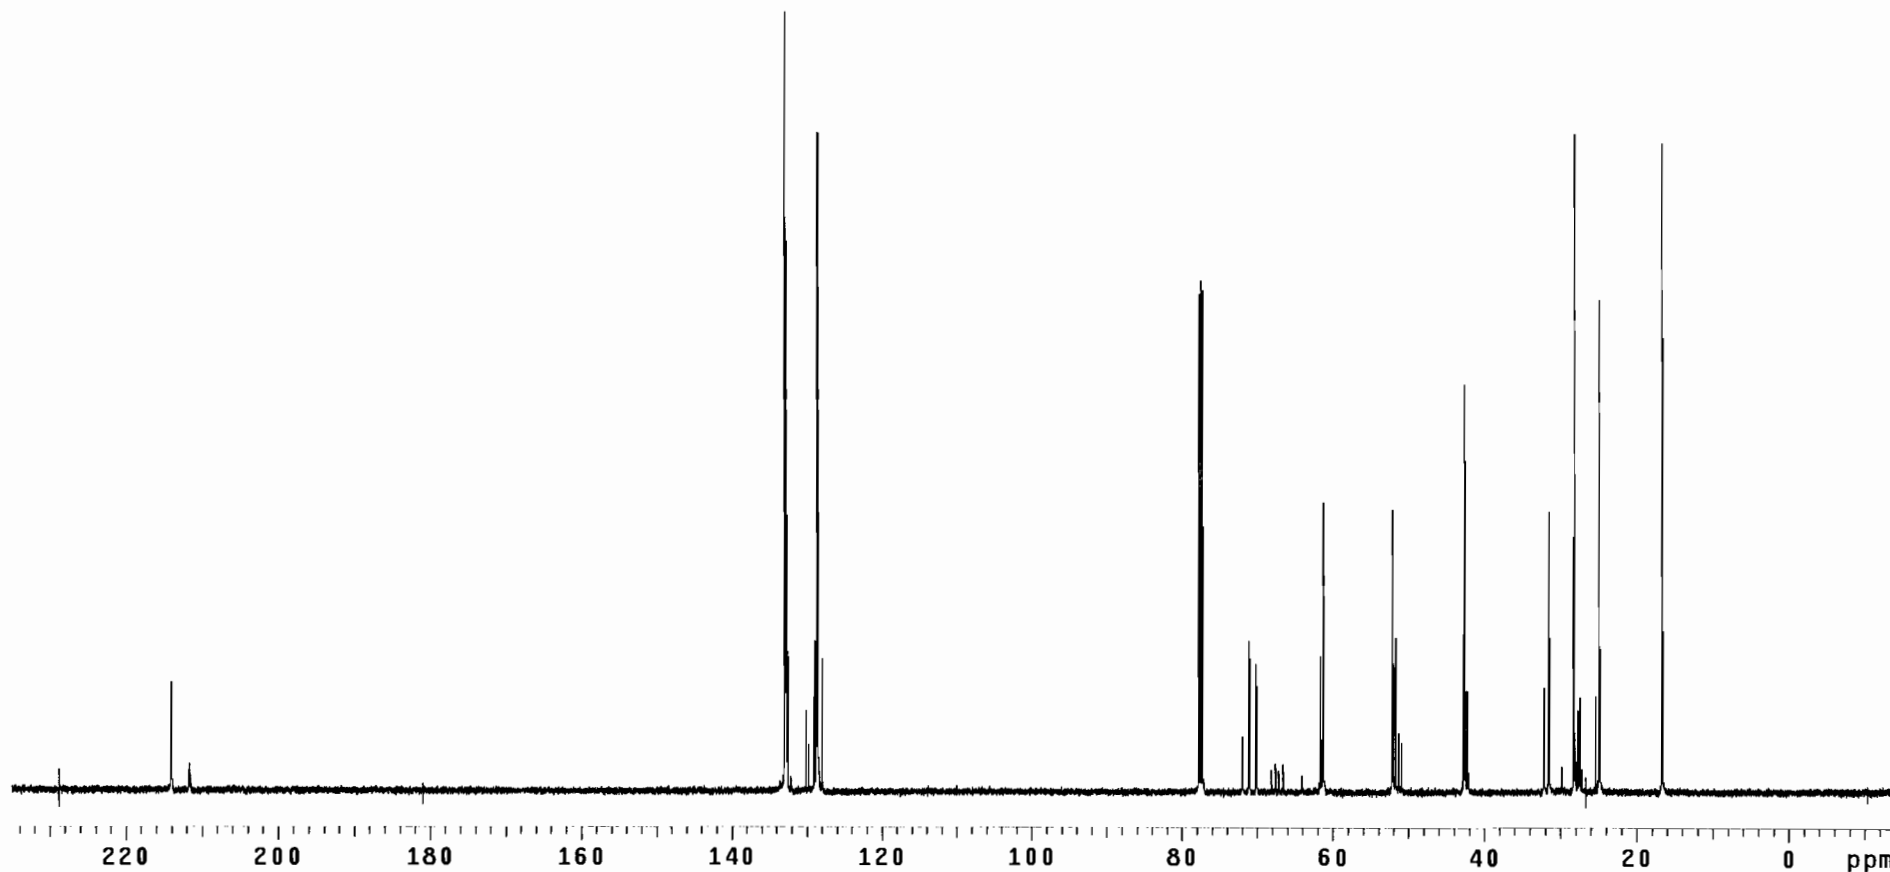

exp1 s2pu1

|             |             |            |          |
|-------------|-------------|------------|----------|
| SAMPLE      |             | DEC. & VT  |          |
| date        | Dec 30 2009 | dfrq       | 499.632  |
| solvent     | CDC13       | dn         | H1       |
| file        | exp         | dpwr       | 36       |
| ACQUISITION |             | dof        | 0        |
| sfrq        | 202.258     | dm         | nny      |
| tn          | P31         | dmm        | w        |
| at          | 1.600       | dmf        | 10954    |
| np          | 64000       | dseq       |          |
| sw          | 20000.0     | dres       | 1.0      |
| fb          | 11000       | homo       | n        |
| tpwr        | 54          | temp       | 26.0     |
| pw          | 4.0         | PROCESSING |          |
| d1          | 5.000       | lb         | 1.00     |
| tof         | 9000.0      | wtfile     |          |
| nt          | 8           | proc       | ft       |
| ct          | 8           | fn         | not used |
| alock       | n           | math       | f        |
| gain        | not used    |            |          |
| FLAGS       |             | werr       | n        |
| il          | n           | wexp       | n        |
| in          | n           | wbs        | n        |
| dp          | y           | wnt        | n        |
| hs          | ny          |            |          |
| DISPLAY     |             |            |          |
| sp          | -396.7      |            |          |
| wp          | 10484.9     |            |          |
| vs          | 80          |            |          |
| sc          | 0           |            |          |
| wc          | 250         |            |          |
| hzmm        | 41.94       |            |          |
| is          | 500.00      |            |          |
| rf1         | 6186.7      |            |          |
| rfp         | 0           |            |          |
| th          | 4           |            |          |
| ins         | 100.000     |            |          |
| nm          | cdc ph      |            |          |

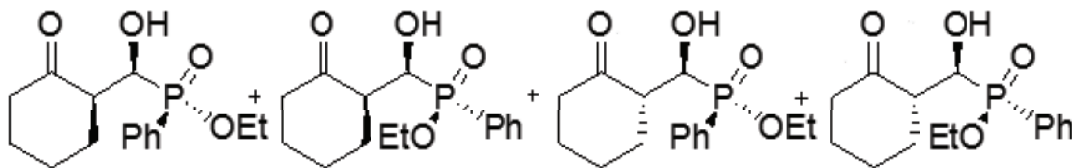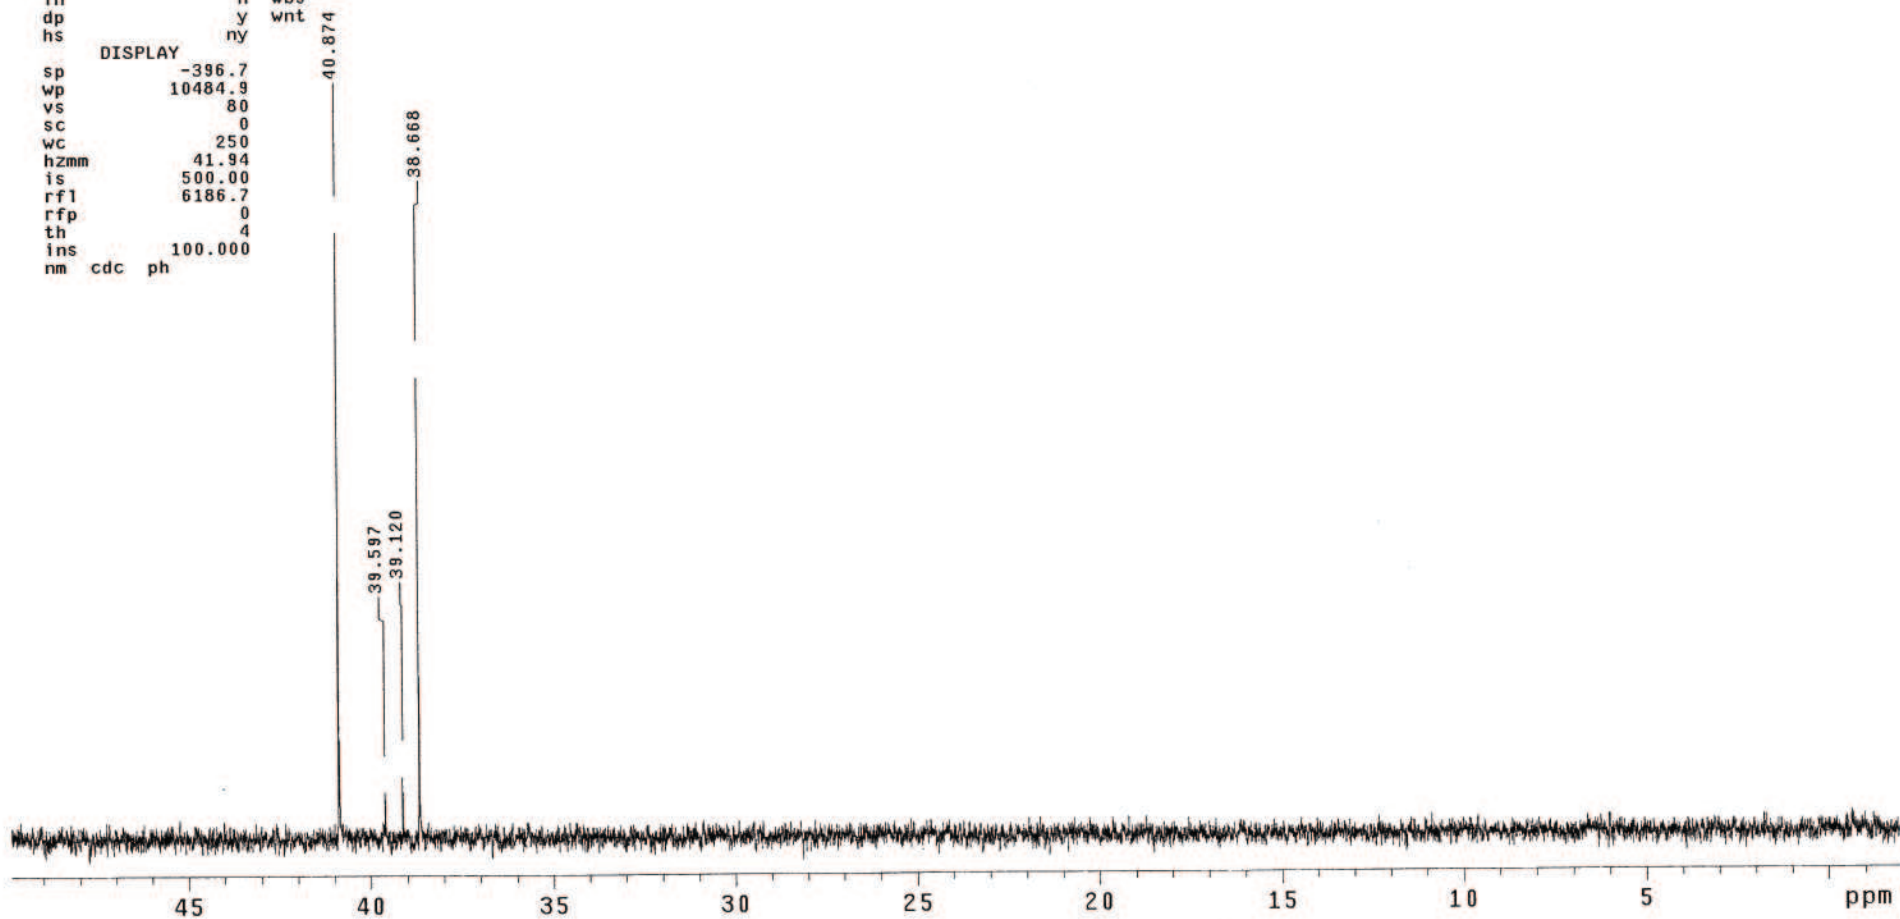

Archive directory: /export/home/vnmr1/vnmrsys/data  
Sample directory:  
File: PROTON

Pulse Sequence: s2pu1

Solvent: CDCl3  
Ambient temperature  
INOVA-500 "Inova500"

Relax. delay 1.000 sec  
Pulse 24.5 degrees  
Acq. time 1.892 sec  
Width 7995.2 Hz  
64 repetitions  
OBSERVE H1, 499.6299995 MHz  
DATA PROCESSING  
FT size 32768  
Total time 3 min, 5 sec

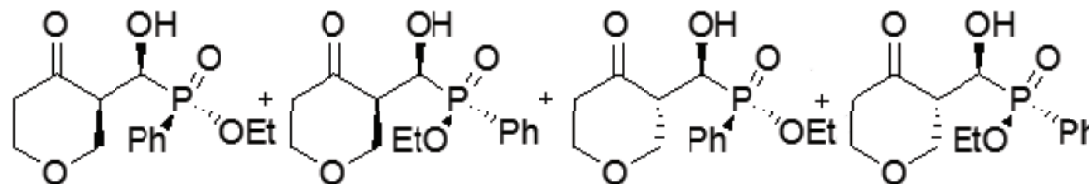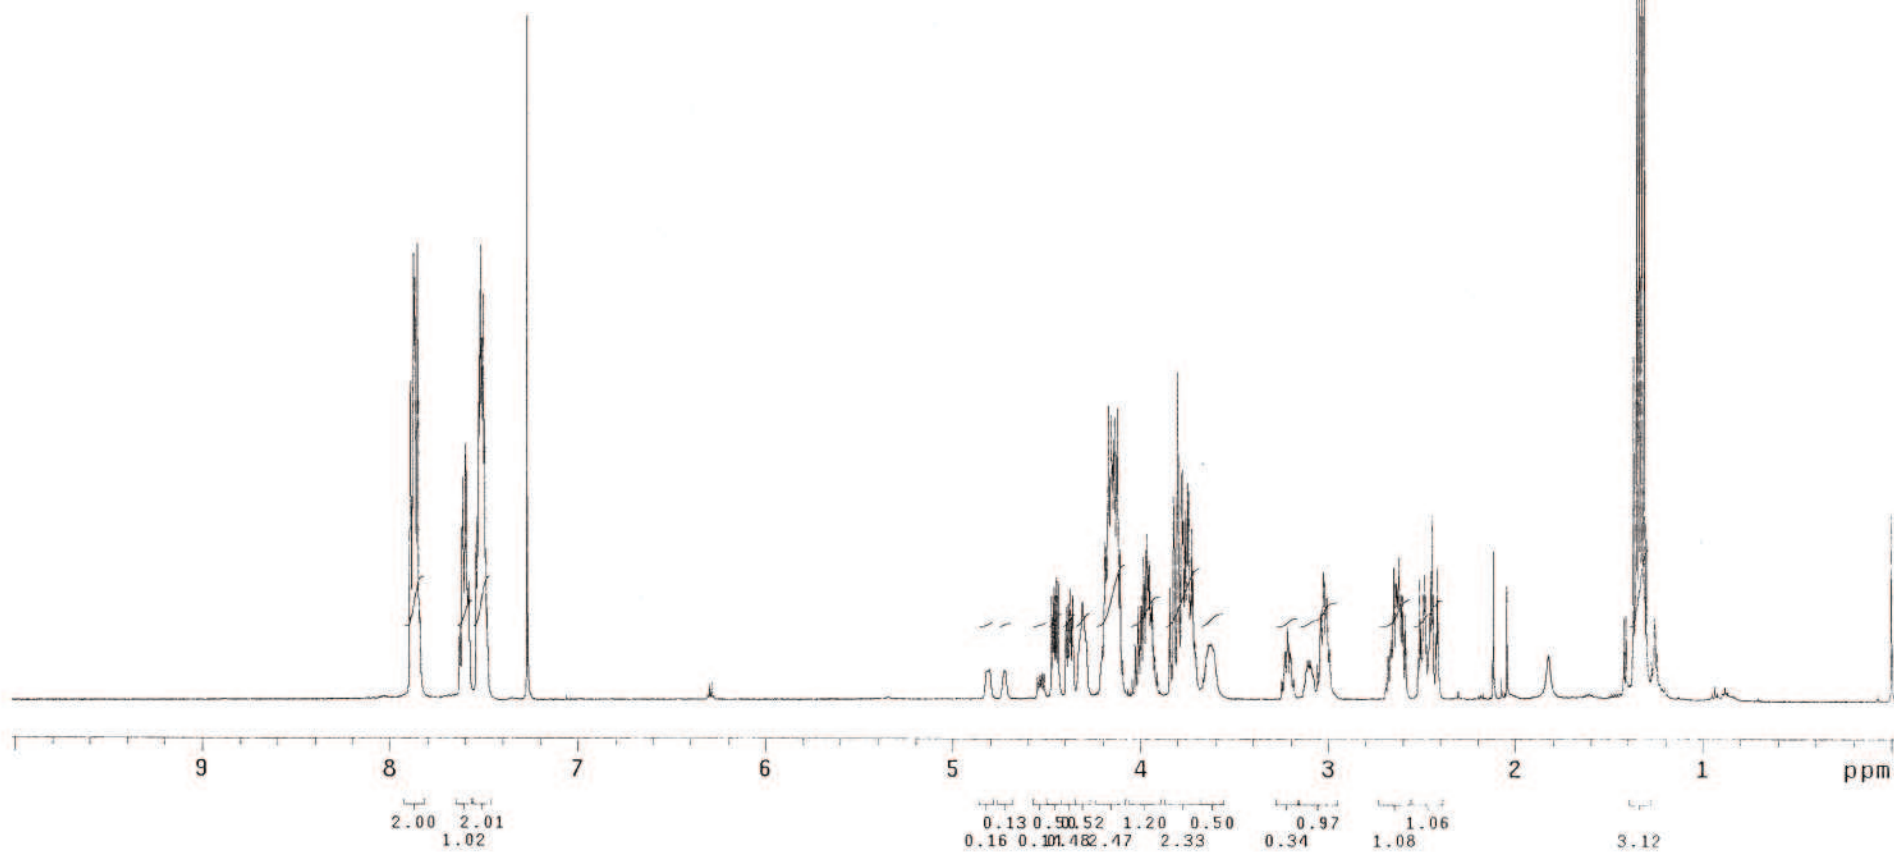

STANDARD CARBON PARAMETERS  
VI-SS-78c

Archive directory: /home/samanta/vnmrSYS/data  
Sample directory:

Pulse Sequence: s2pu1

Solvent: CDCl3  
Ambient temperature  
User: 1-14-87  
File: VI-SS-78C  
INOVA-500 "Inova500"

Relax. delay 1.000 sec  
Pulse 45.0 degrees  
Acq. time 1.300 sec  
Width 31409.5 Hz  
1088 repetitions  
OBSERVE C13, 125.6457928 MHz  
DECOUPLE H1, 499.6872185 MHz  
Power 36 dB  
continuously on  
WALTZ-16 modulated  
DATA PROCESSING  
Line broadening 0.5 Hz  
FT size 131072  
Total time 3 hr, 12 min, 26 sec

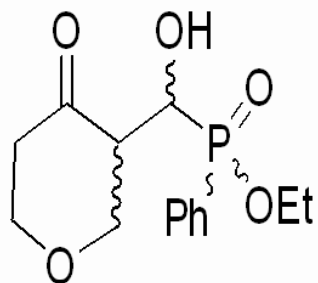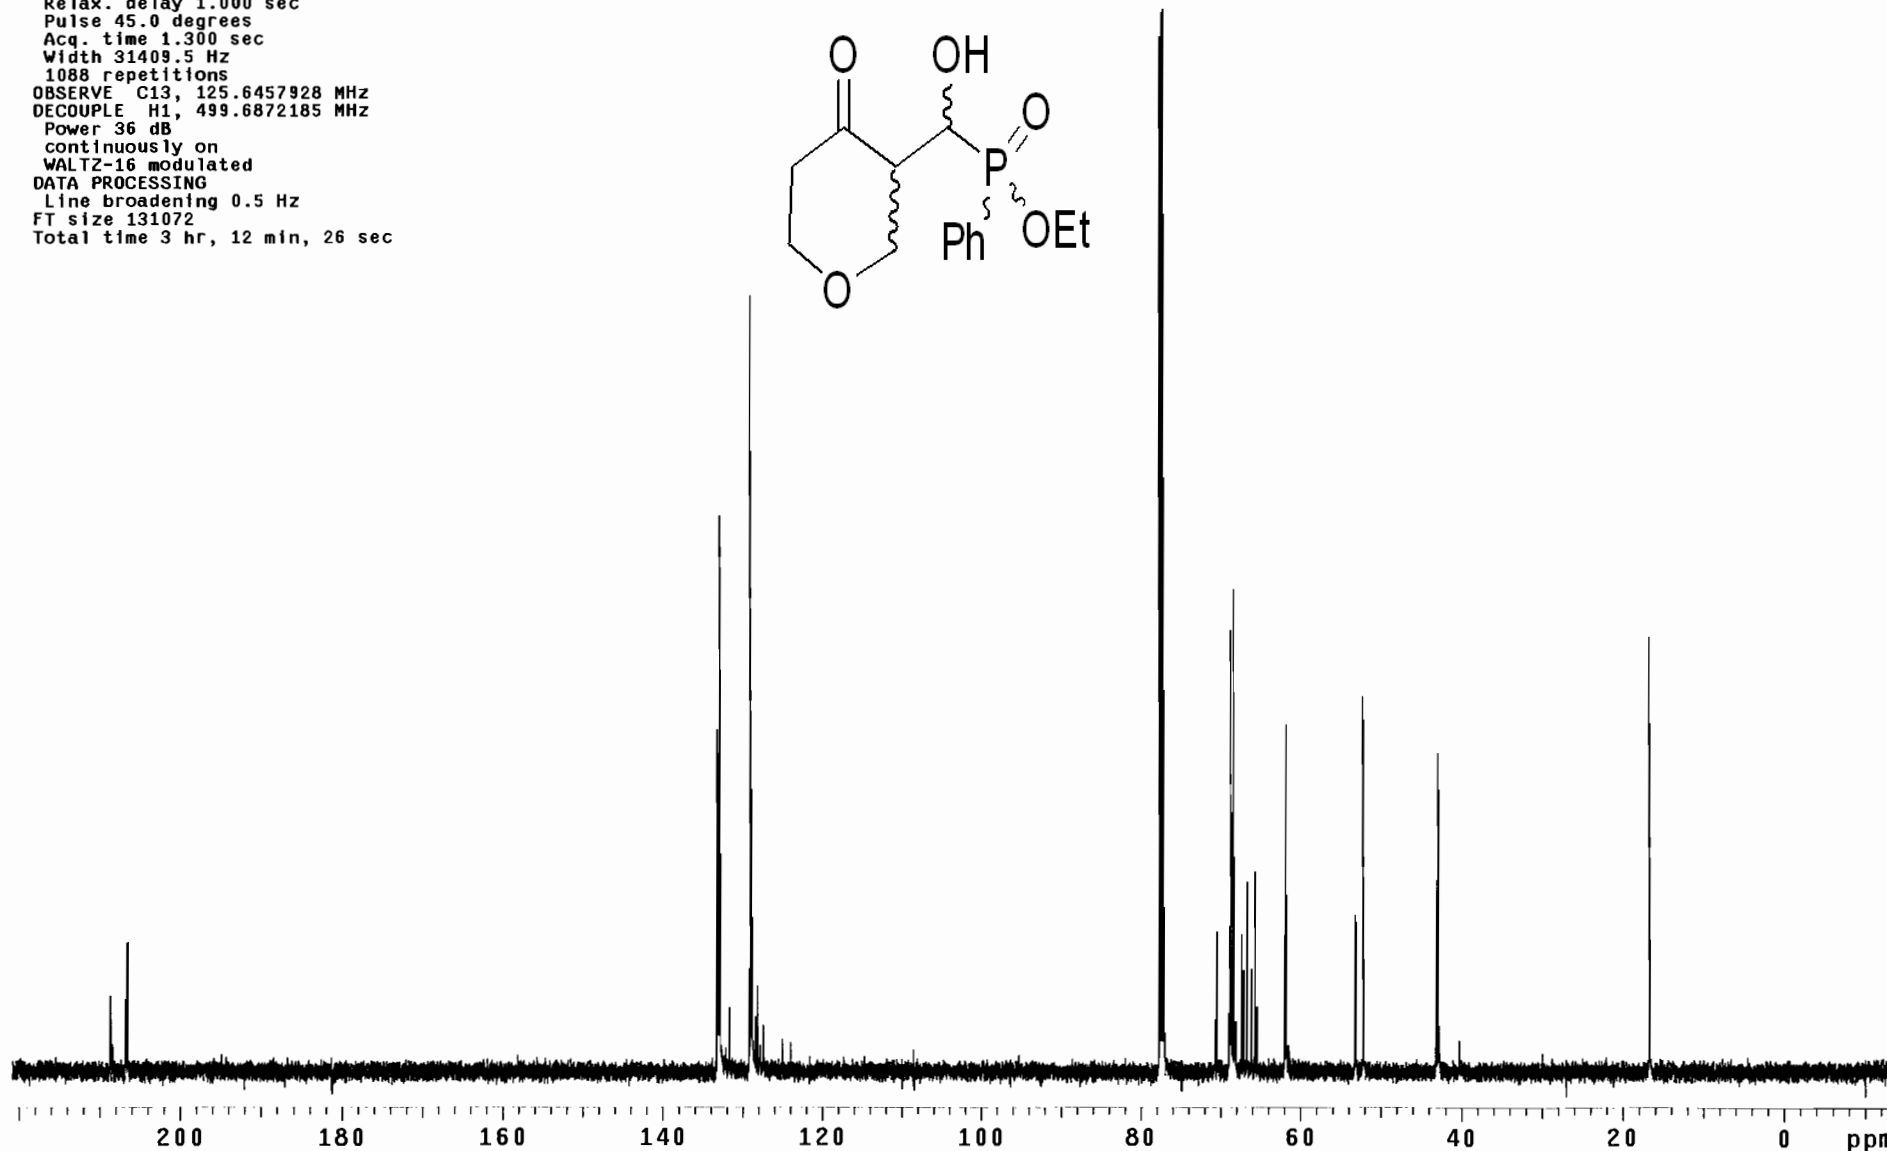

exp1 s2pul

| SAMPLE      |             | DEC. & VT  |          |
|-------------|-------------|------------|----------|
| date        | Dec 30 2009 | dfrq       | 499.632  |
| solvent     | CDC13       | dn         | H1       |
| file        | exp         | dpwr       | 36       |
| ACQUISITION |             |            |          |
| sfrq        | 202.258     | dm         | nny      |
| tn          | P31         | dmm        | w        |
| at          | 1.600       | dmf        | 10954    |
| np          | 64000       | dseq       |          |
| sw          | 20000.0     | dres       | 1.0      |
| fb          | 11000       | homo       | n        |
| tpwr        | 54          | temp       | 26.0     |
| pw          | 4.0         | PROCESSING |          |
| d1          | 5.000       | lb         | 1.00     |
| tof         | 9000.0      | wtfile     |          |
| nt          | 8           | proc       | ft       |
| ct          | 8           | fn         | not used |
| alock       | n           | math       | f        |
| gain        | not used    |            |          |
| FLAGS       |             | werr       | n        |
| il          | n           | wexp       | n        |
| in          | n           | wbs        | n        |
| dp          | y           | wnt        | n        |
| hs          | ny          |            |          |
| DISPLAY     |             |            |          |
| sp          | -396.7      |            |          |
| wp          | 10484.9     |            |          |
| vs          | 80          |            |          |
| sc          | 0           |            |          |
| wc          | 250         |            |          |
| hzmm        | 41.94       |            |          |
| is          | 500.00      |            |          |
| rfl         | 6186.7      |            |          |
| rfp         | 0           |            |          |
| th          | 9           |            |          |
| ins         | 100.000     |            |          |
| nm          | cdc ph      |            |          |

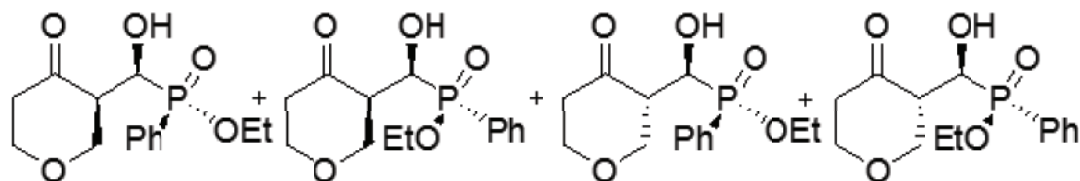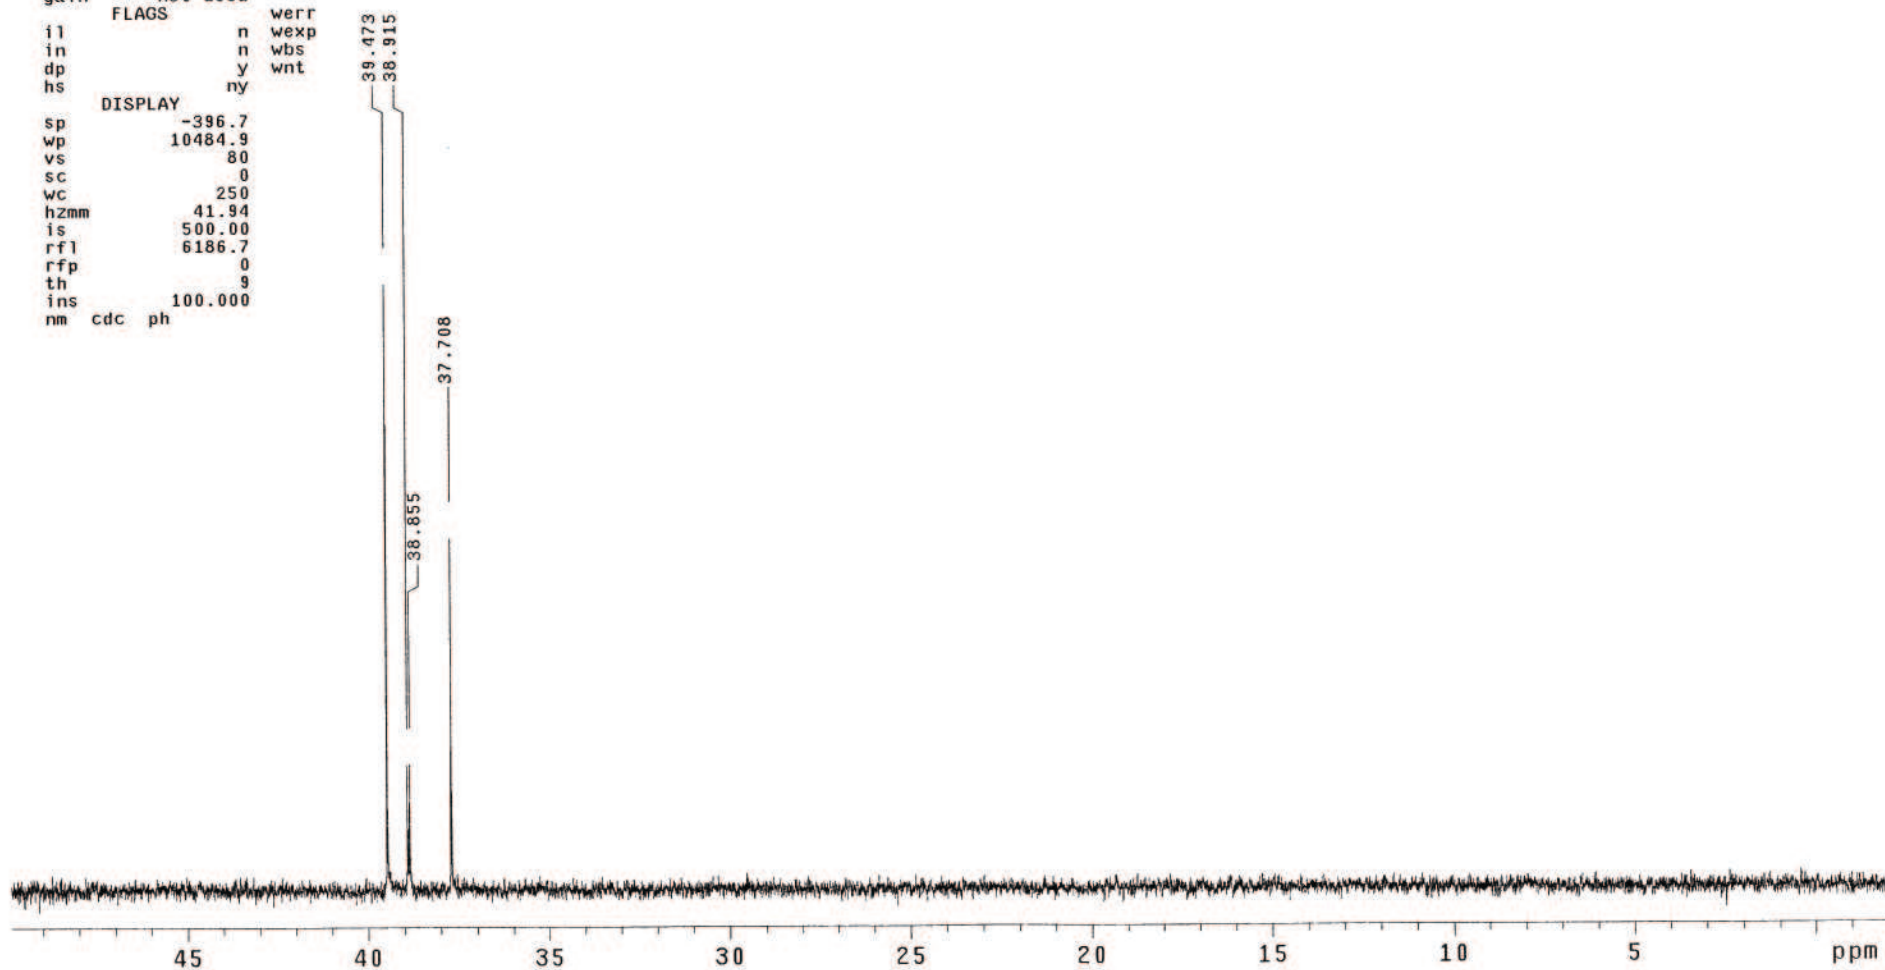

Archive directory: /export/home/vnmr1/vnmrsys/data  
Sample directory:

Pulse Sequence: s2pul  
Solvent: CDC13  
Ambient temperature  
File: 3-sp-28cyclopentane  
INOVA-500 "Inova500"

Relax. delay 1.000 sec  
Pulse 24.5 degrees  
Acq. time 1.892 sec  
Width 7995.2 Hz  
32 repetitions  
OBSERVE H1, 499.6299995 MHz  
DATA PROCESSING  
FT size 32768  
Total time 1 min, 32 sec

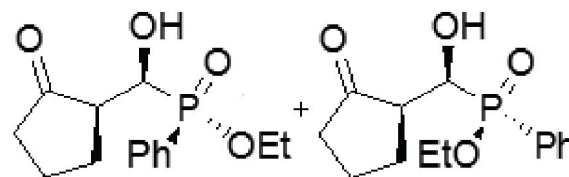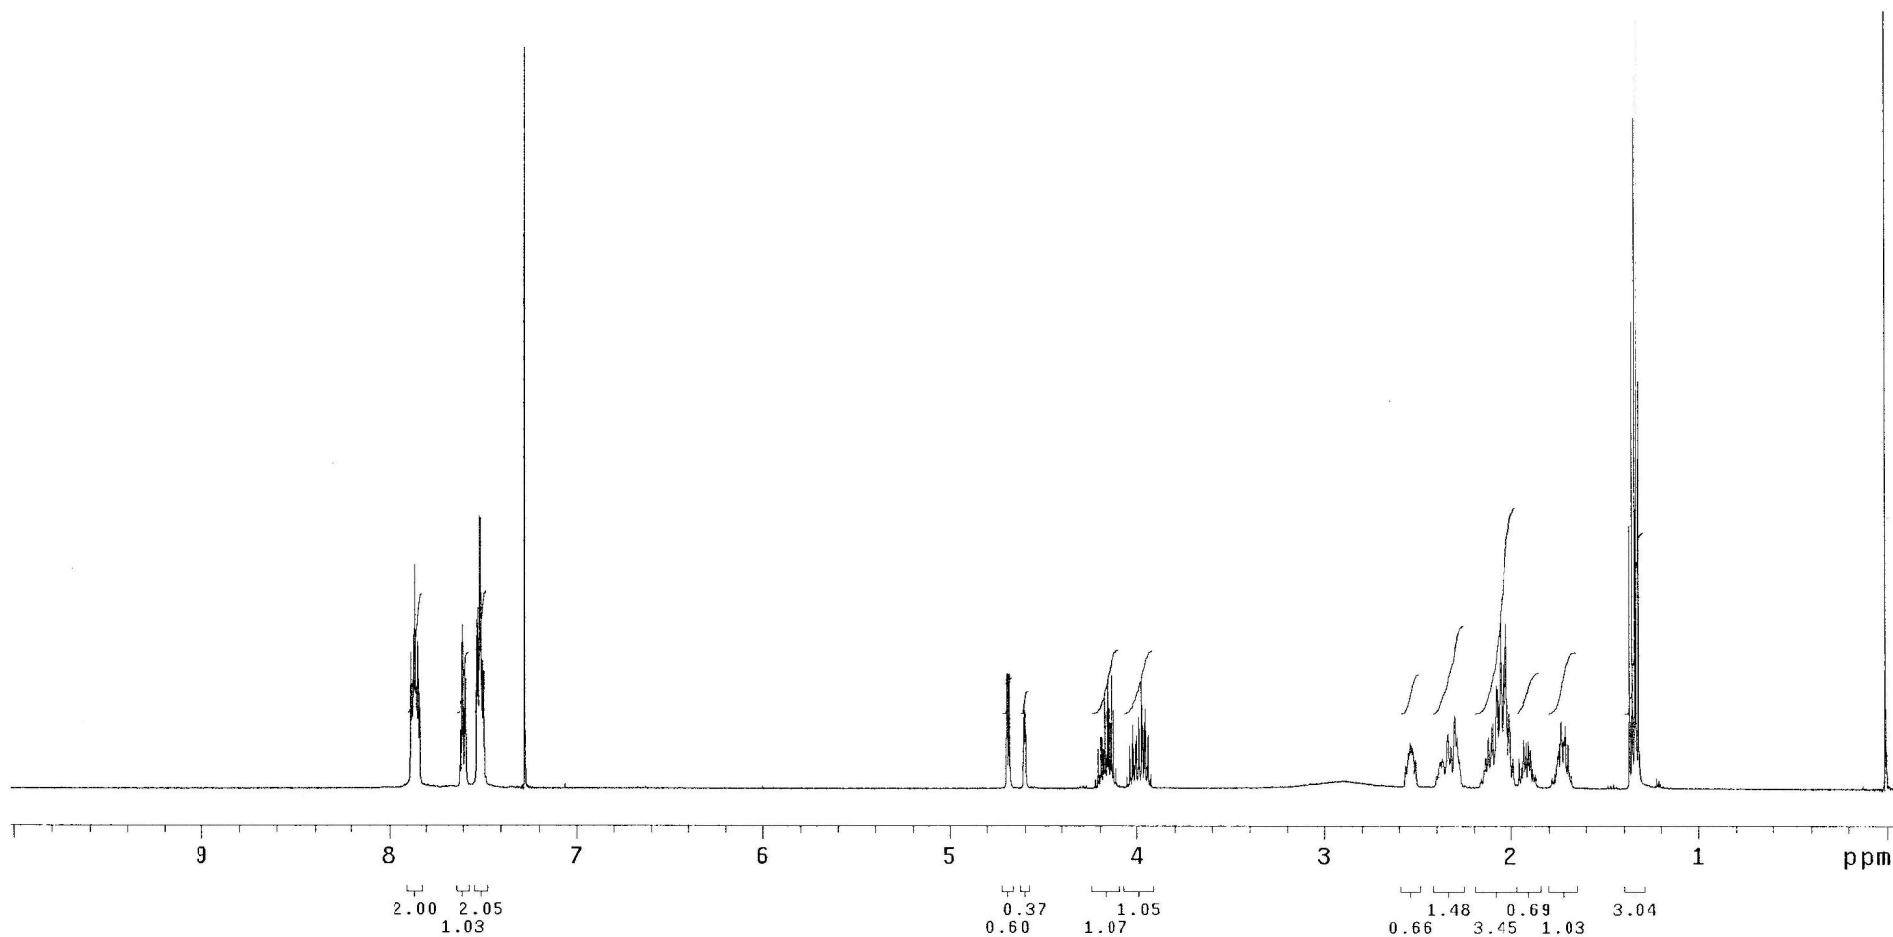



STANDARD CARBON PARAMETERS  
VI-SS-cyclopentanonecarbon

Archive directory: /home/samanta/vnmrsys/data  
Sample directory:

Pulse Sequence: s2pu1

Solvent: CDC13  
Ambient temperature  
User: 1-14-87

File: VI-SS-cyclopentanonecarbon  
INOVA-500 "Inova500"

Relax. delay 1.000 sec  
Pulse 45.0 degrees  
Acq. time 1.300 sec  
Width 31409.5 Hz  
20000 repetitions  
OBSERVE C13, 125.6457928 MHz  
DECOUPLE H1, 499.6872185 MHz  
Power 36 dB  
continuously on  
WALTZ-16 modulated  
DATA PROCESSING  
Line broadening 0.5 Hz  
FT size 131072  
Total time 12 hr, 49 min, 47 sec

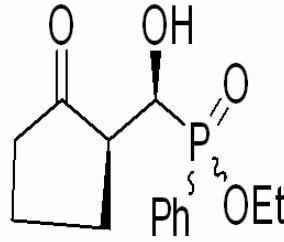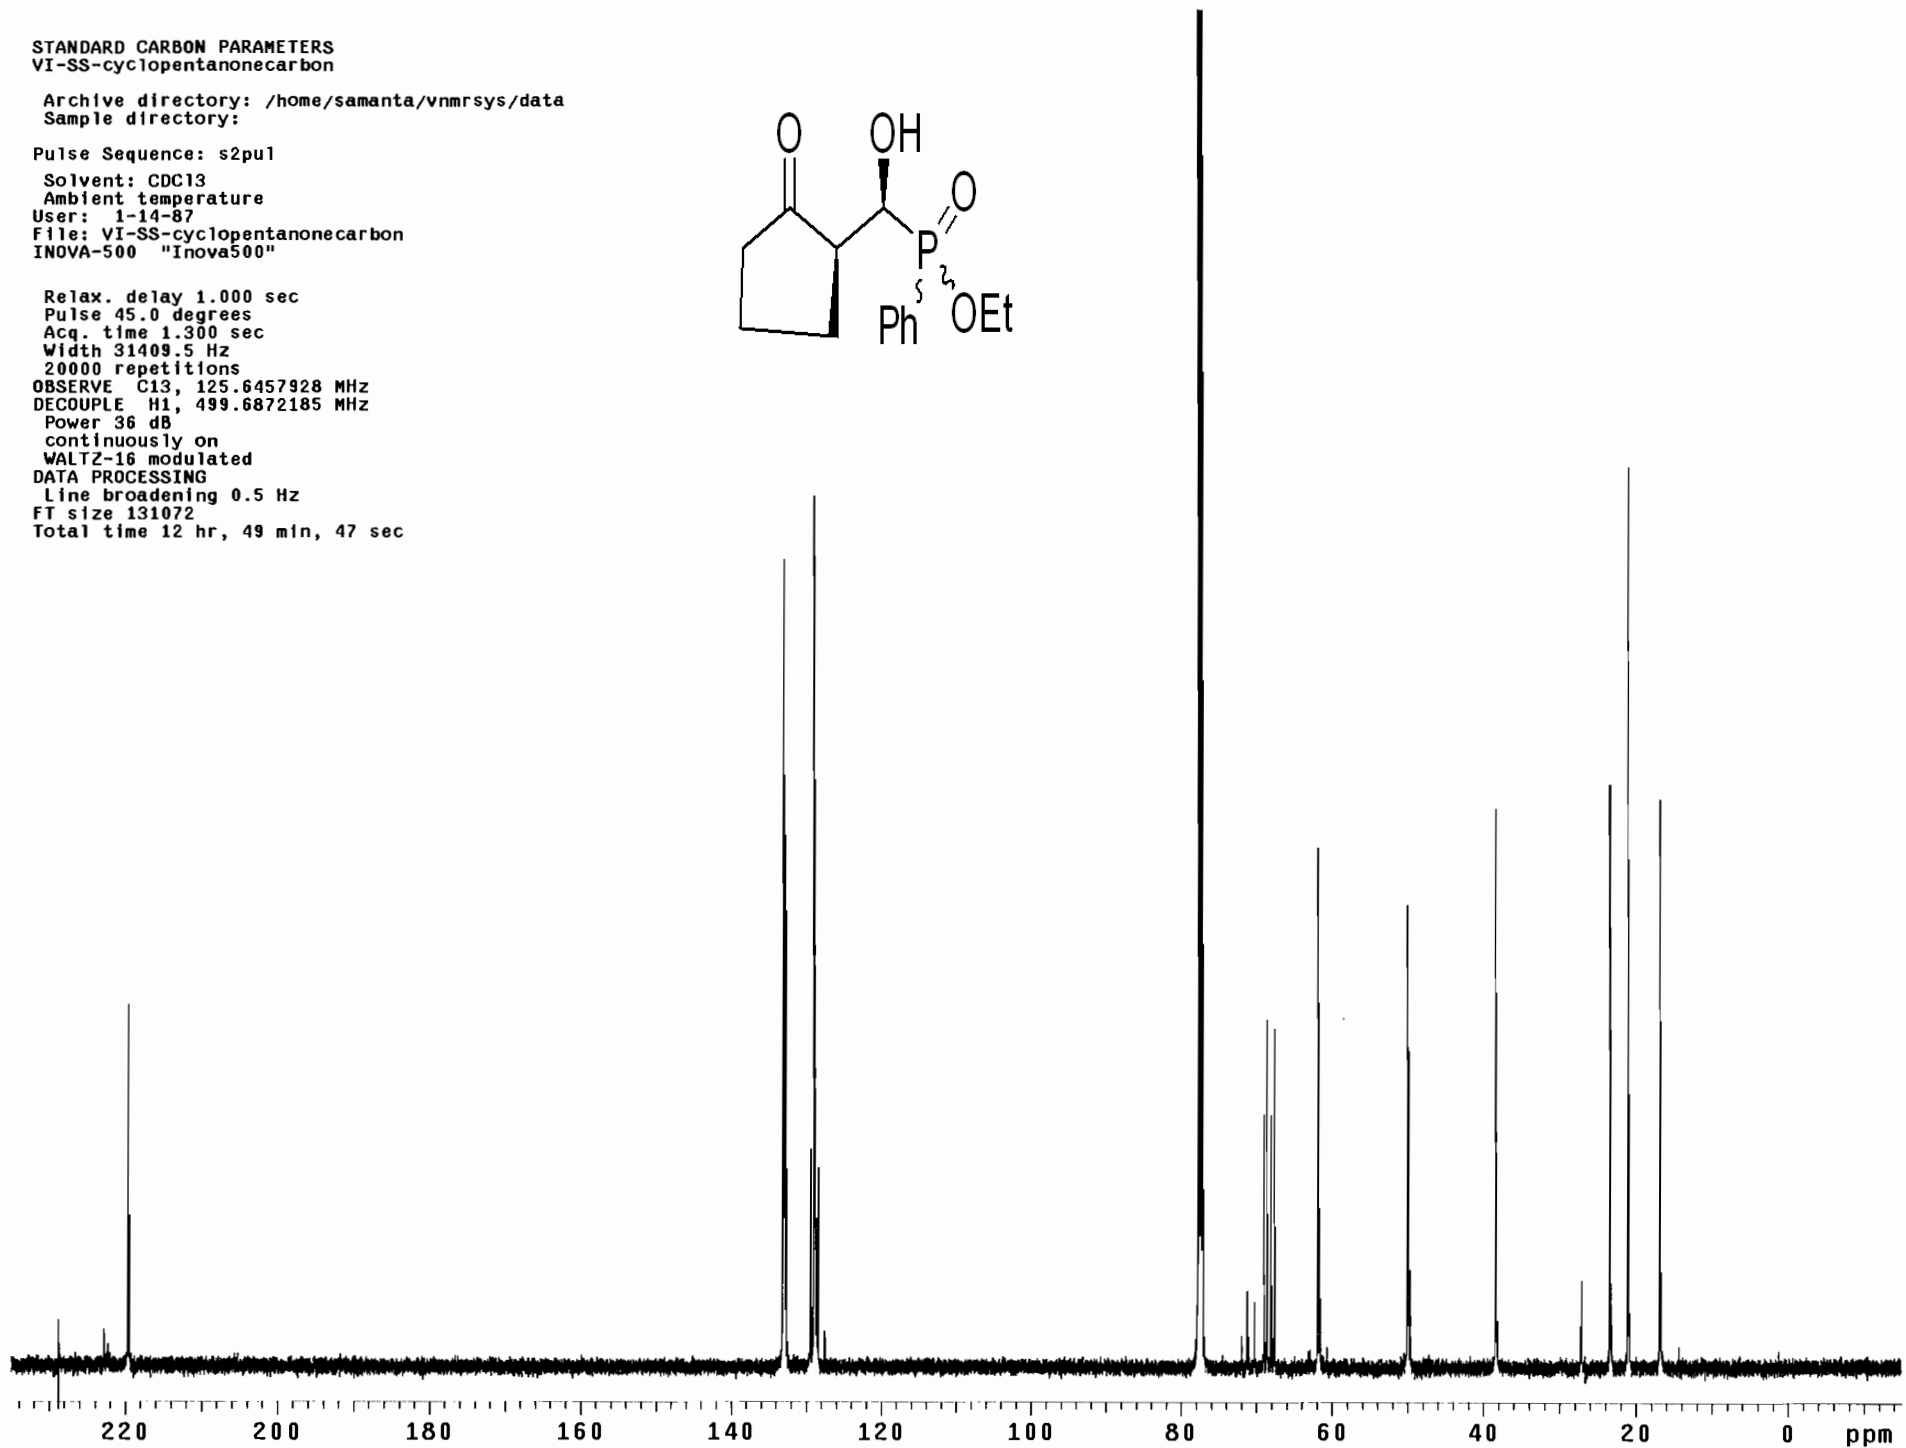

```

expl s2pu1
SAMPLE          DEC. & VT
date   Dec 30 2009  dfrq   499.632
solvent CDC13      dn     H1
file   exp        dpwr   36
ACQUISITION    dof     0
sfrq   202.258   dm     nny
tn     P31       dmm    w
at     1.600    dmf    10954
np     64000    dseq
sw     20000.0  dres   1.0
fb     11000   homo   n
tpwr   54      temp   26.0
pw     4.0     PROCESSING
d1     5.000   lb     1.00
tof    9000.0 wtfile
nt     16     proc   ft
ct     16     fn     not used
alock  n      math   f
gain   not used
FLAGS
il     n      werr
in     n      wexp
dp     y      wbs
hs     ny     wnt
DISPLAY
sp     -427.9
wp     10578.9
vs     42
sc     0
wc     250
hzmm   42.32
is     500.00
rfl    6186.7
rfp    0
th     17
ins    100.000
nm     cdc ph

```

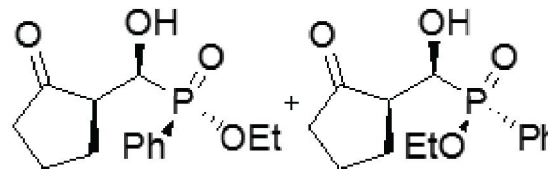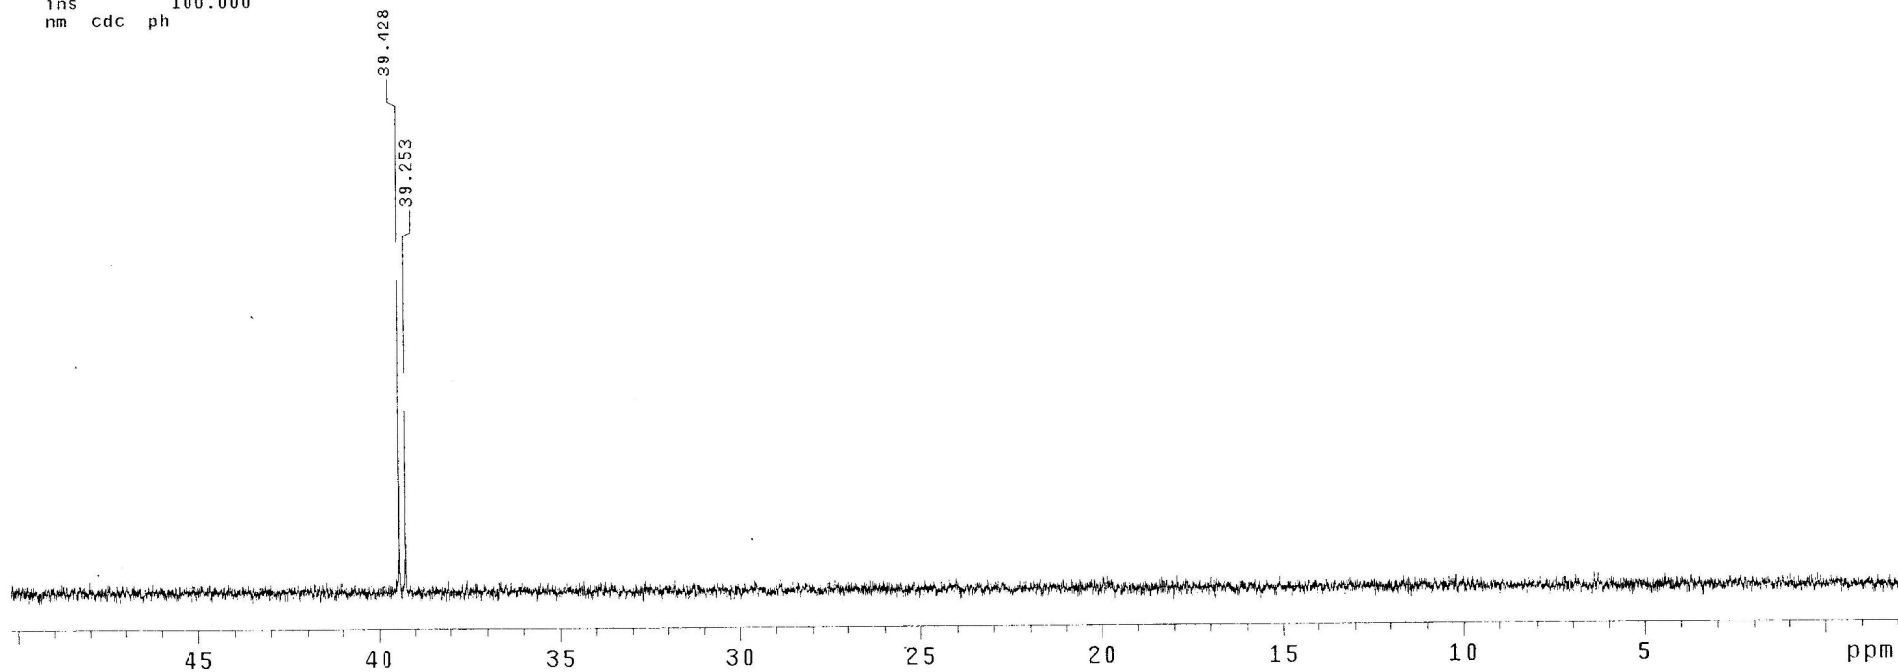

3-sp29\_NOE01F

exp3 cyclenoe

```
SAMPLE          DEC. & VI
date Jan 4 2010  dn          C13
solvent CDC13    dof          -154.3
file          exp          dm          nnn
ACQUISITION     dmm          c
sfrq          499.633     dpwr          0
tn            H1          dpwrf         undefined
at            4.378       homo          n
np            70000       temp          26.0
sw            7995.2      PROCESSING
fb            4000        fn          not used
bs            32          math          f
pw            12.5
d1            4.000       werr
tof           499.5       wexp          process
nt            344        wbs
ct            344        wnt
alock         n          DISPLAY
gain          40         sp           -112.3
FLAGS         wp           5182.9
il            n          vs           9707
in            n          sc           0
dp            y          wc           250
hs            nn         hzmm         20.73
satfrq        -154.3     is           171.90
satpwr        -10       rfl
sattime       2.0        rfp
spacing       6.3        th
pattern       2          ins
intsub        y          ai
cycle         y          cdc
control       465.8      ph
mix           0
tau           0.100
sspul        y
```

# NOE experiment for

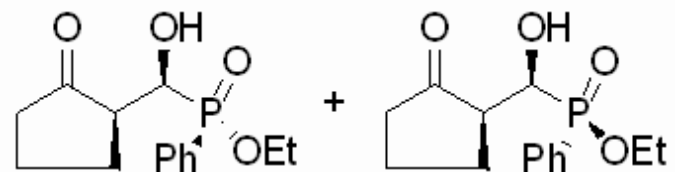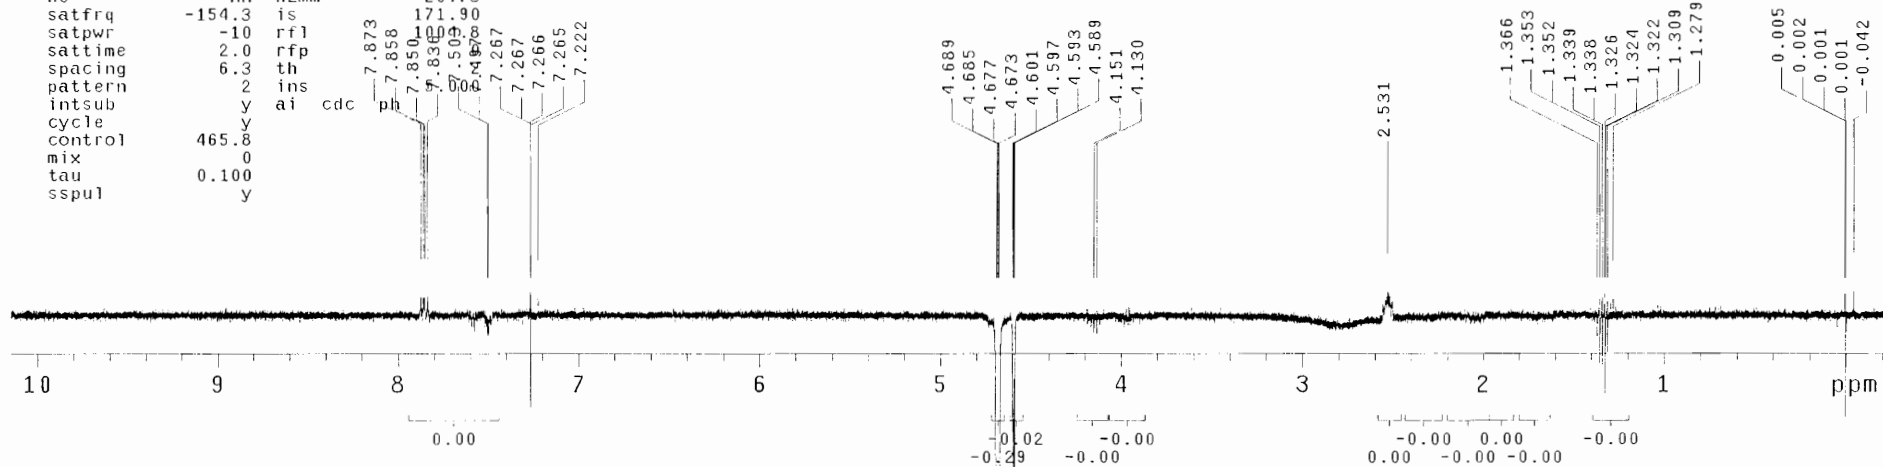

3-sp-30\_NOE\_Difference

exp3 cyclenoe

| SAMPLE      |            | DEC. & VT  |           |
|-------------|------------|------------|-----------|
| date        | Jan 6 2010 | dn         | C13       |
| solvent     | CDC13      | dof        | 392.1     |
| file        | exp        | dm         | nnn       |
| ACQUISITION |            |            |           |
| sfrq        | 499.633    | dmm        | c         |
| tn          | H1         | dpwr       | undefined |
| at          | 4.378      | homo       | n         |
| np          | 70000      | PROCESSING |           |
| sw          | 7995.2     | fn         | not used  |
| fb          | 4000       | math       | f         |
| bs          | 32         |            |           |
| pw          | 3.4        | werr       |           |
| d1          | 2.000      | wexp       | process   |
| tof         | 499.5      | wbs        |           |
| nt          | 512        | wnt        |           |
| ct          | 512        | DISPLAY    |           |
| alock       | n          | sp         | -109.3    |
| gain        | 58         | wp         | 5108.2    |
| FLAGS       |            |            |           |
| il          | n          | sc         | 0         |
| in          | n          | wc         | 250       |
| dp          | y          | hzmm       | 20.43     |
| hs          | nn         | is         | 33.57     |
| satfrq      | -1081.0    | rfl        | 999.9     |
| satpwr      | -10        | rfp        | 0         |
| sattime     | 1.0        | th         | 7         |
| spacing     | 9.1        | ins        | 100.000   |
| pattern     | 6          | nm         | cdc ph    |
| intsub      | y          |            |           |
| cycle       | y          |            |           |
| control     | 392.1      |            |           |
| mix         | 0          |            |           |
| tau         | 0.100      |            |           |
| sspul       | y          |            |           |

NOE experiment for

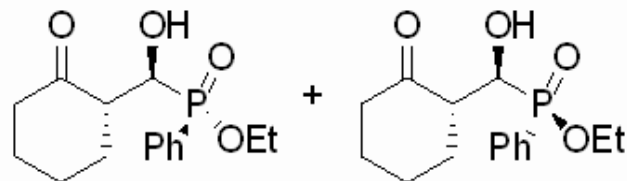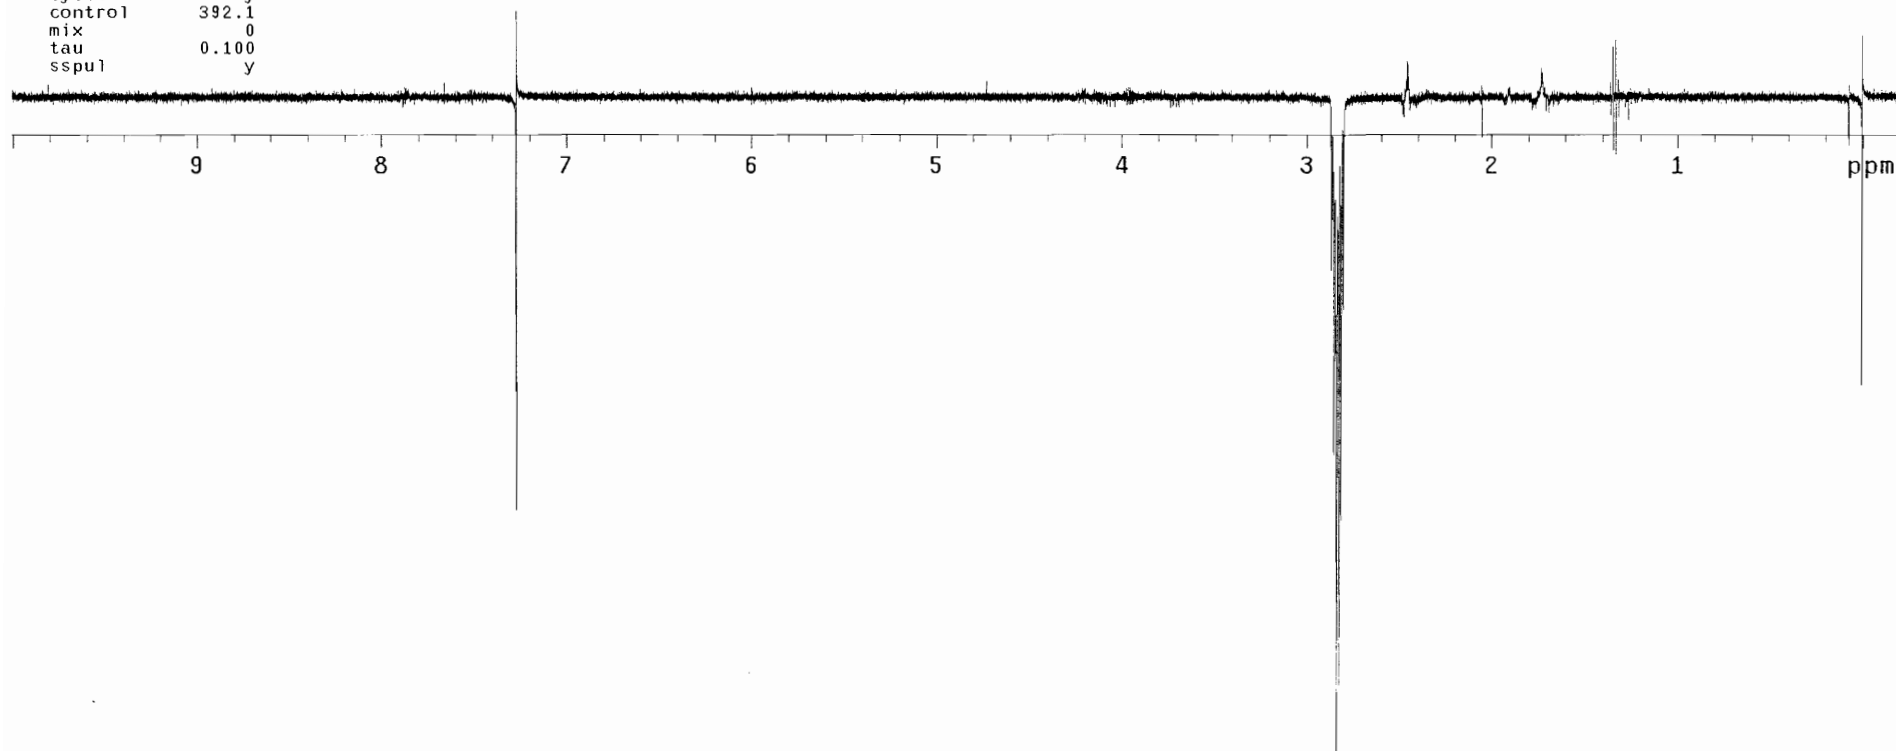

**Area % Report**

Method Name: C:\EZStart\Projects\Default\Methods\AS.met

Data: C:\EZStart\Projects\Default\Data\v-ss-92l

User: System

Acquired: 4/27/2006 2:23:27 PM

Printed: 4/25/2007 2:10:32 PM

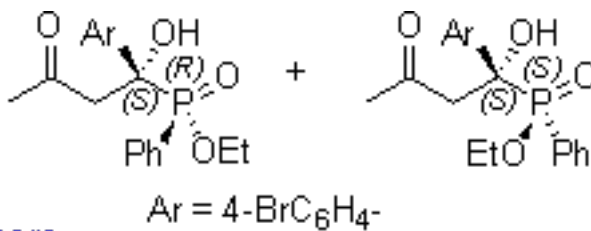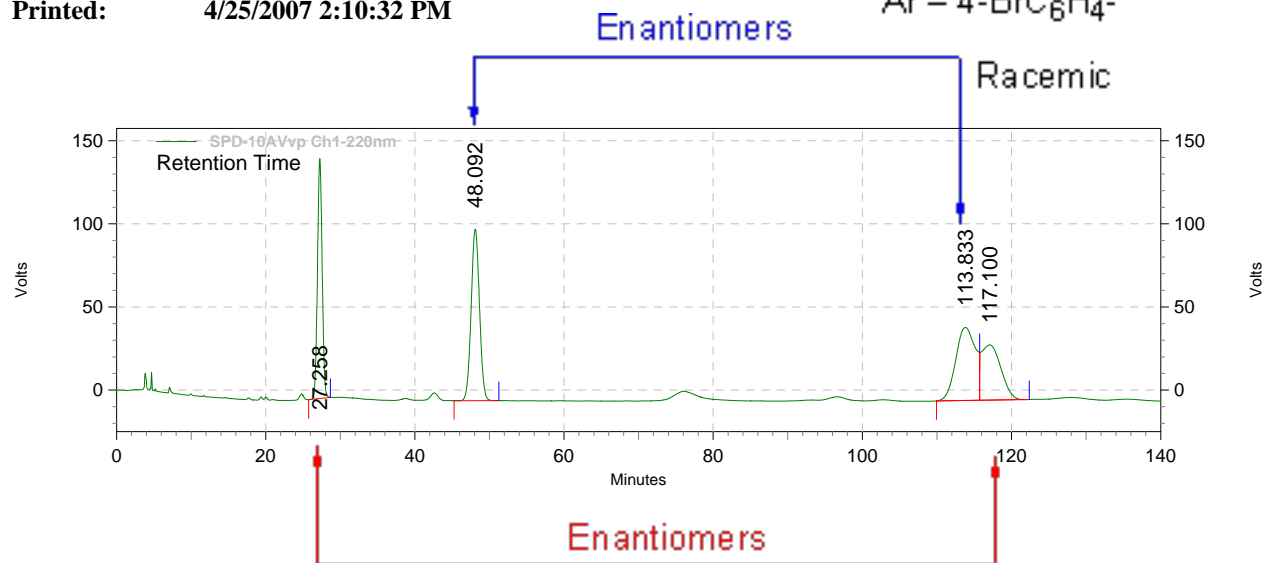

SPD-10AVvp

Ch1-220nm

Results

| Retention Time | Area     | Area % | Height | Height % |
|----------------|----------|--------|--------|----------|
| 27.258         | 6307405  | 22.20  | 144252 | 44.42    |
| 48.092         | 8022192  | 28.24  | 103296 | 31.81    |
| 113.833        | 8053997  | 28.35  | 43919  | 13.52    |
| 117.100        | 6026061  | 21.21  | 33258  | 10.24    |
| Totals         | 28409655 | 100.00 | 324725 | 100.00   |

## Area % Report

Method Name: C:\EZStart\Projects\Default\Methods\AS.met  
 Data: C:\EZStart\Projects\Default\Data\VIII-SS-35b  
 User: System  
 Acquired: 12/20/2006 3:20:15 PM  
 Printed: 4/26/2007 3:00:02 PM

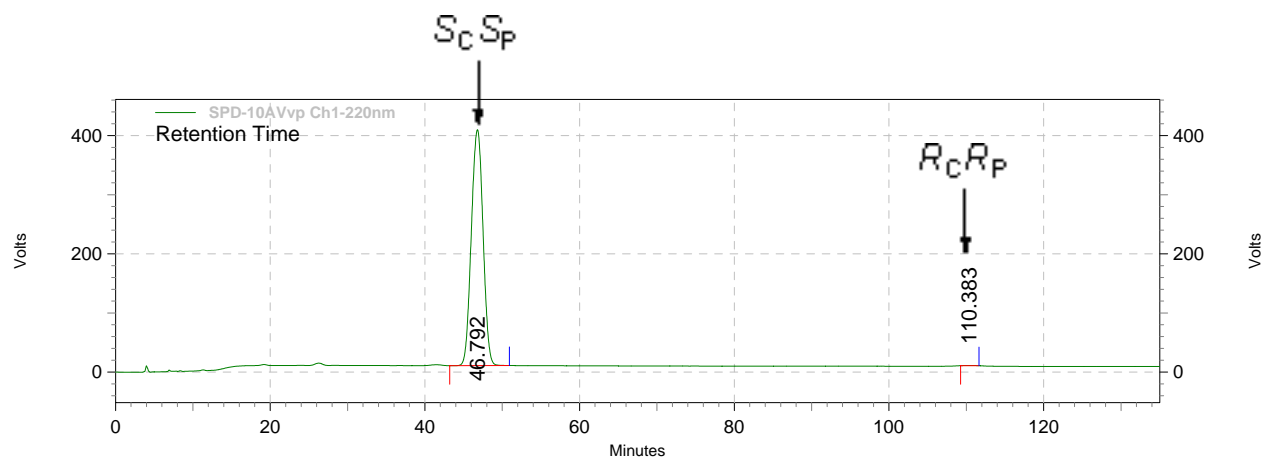

### SPD-10AVvp Ch1-220nm Results

| Retention Time | Area     | Area % | Height | Height % |
|----------------|----------|--------|--------|----------|
| 46.792         | 41985162 | 99.92  | 398934 | 99.91    |
| 110.383        | 34943    | 0.08   | 379    | 0.09     |

| Totals | Area     | Area % | Height | Height % |
|--------|----------|--------|--------|----------|
|        | 42020105 | 100.00 | 399313 | 100.00   |

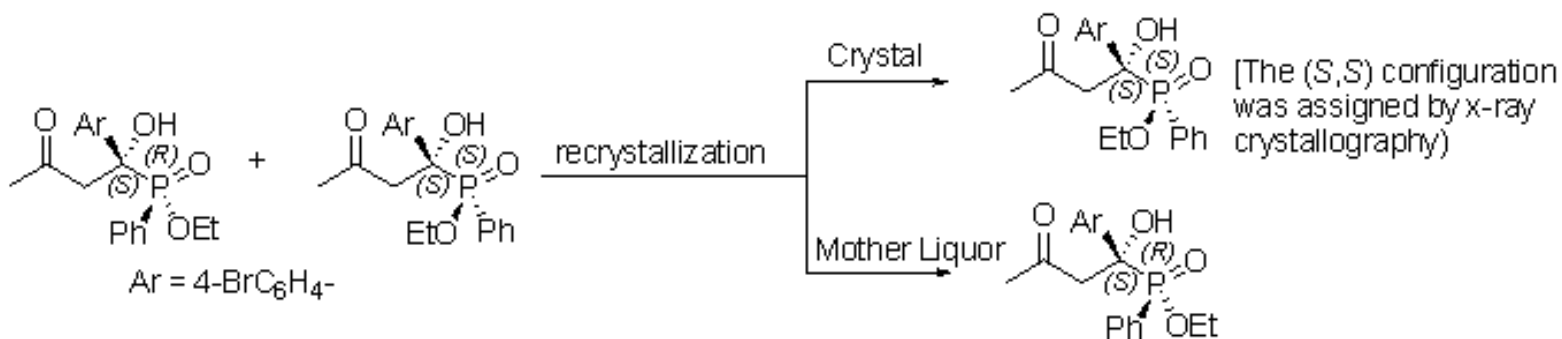

## Area % Report

Method Name: C:\EZStart\Projects\Default\Methods\AS.met  
 Data: C:\EZStart\Projects\Default\Data\vi-ss-100  
 User: System  
 Acquired: 10/10/2006 9:59:16 AM  
 Printed: 4/25/2007 2:12:24 PM

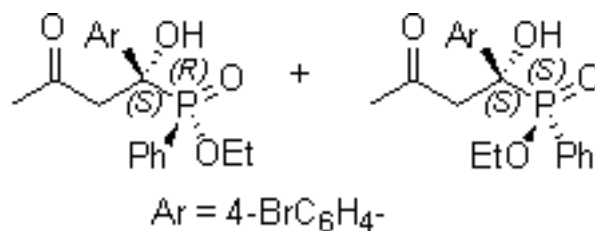

D-Proline as the catalyst

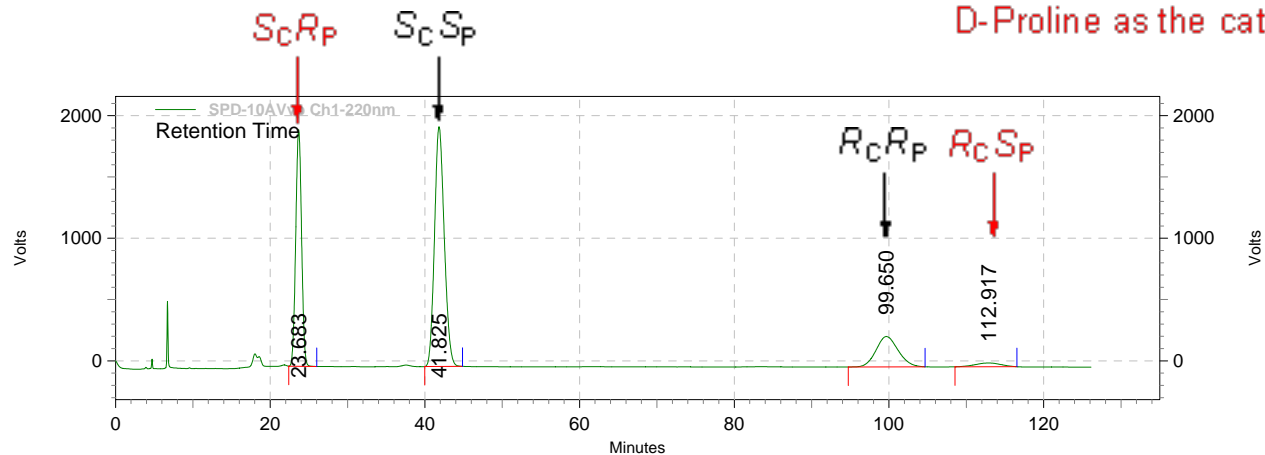

SPD-10AVvp  
 Ch1-220nm  
 Results

| Retention Time | Area      | Area % | Height  | Height % |
|----------------|-----------|--------|---------|----------|
| 23.683         | 101402953 | 30.78  | 1929494 | 46.34    |
| 41.825         | 171735609 | 52.14  | 1955603 | 46.97    |
| 99.650         | 49182378  | 14.93  | 247436  | 5.94     |
| 112.917        | 7077277   | 2.15   | 30915   | 0.74     |
| Totals         | 329398217 | 100.00 | 4163448 | 100.00   |

# Area % Report

**Method Name:** C:\EZStart\Projects\Default\Methods\AS.met  
**Data:** C:\EZStart\Projects\Default\Data\V-SS-99A  
**User:** System  
**Acquired:** 5/3/2006 10:44:43 AM  
**Printed:** 4/25/2007 2:11:19 PM

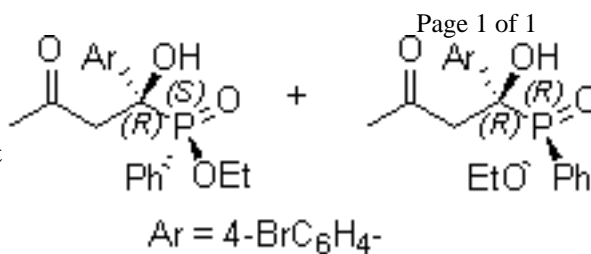

L-Proline as the catalyst

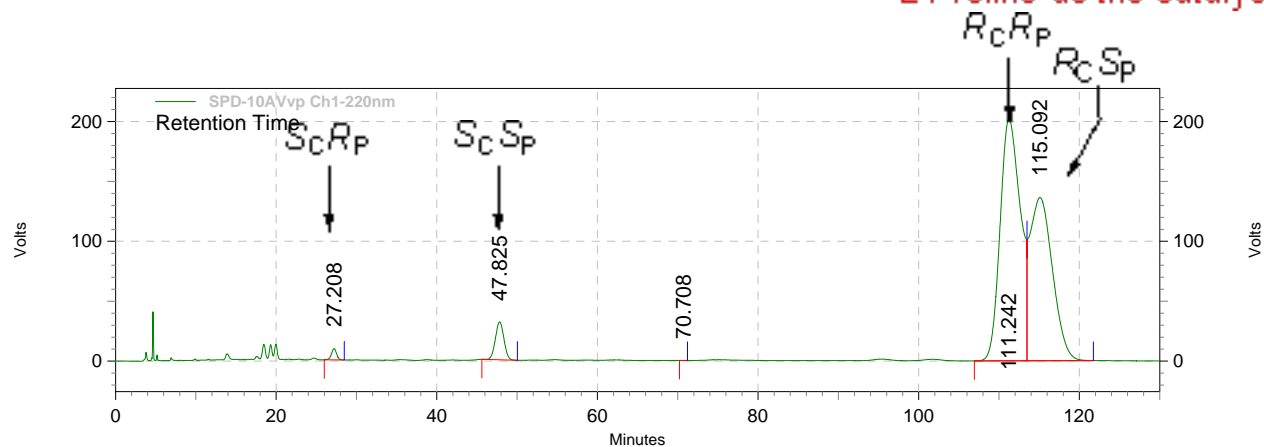

**SPD-10AVvp**  
**Ch1-220nm**  
**Results**

| Retention Time | Area     | Area % | Height | Height % |
|----------------|----------|--------|--------|----------|
| 27.208         | 419158   | 0.65   | 9420   | 2.48     |
| 47.825         | 2332862  | 3.61   | 31592  | 8.33     |
| 70.708         | 834      | 0.00   | 28     | 0.01     |
| 111.242        | 35326343 | 54.61  | 202051 | 53.27    |
| 115.092        | 26614828 | 41.14  | 136197 | 35.91    |

|        |          |        |        |        |
|--------|----------|--------|--------|--------|
| Totals | 64694025 | 100.00 | 379288 | 100.00 |
|--------|----------|--------|--------|--------|



**Area % Report**

**Method Name:** C:\EZStart\Projects\Default\Methods\AS.met  
**Data:** C:\EZStart\Projects\Default\Data\VI-SS-8A  
**User:** System  
**Acquired:** 6/19/2006 11:15:05 AM  
**Printed:** 4/25/2007 2:03:09 PM

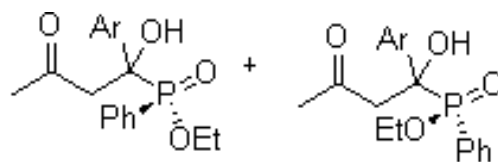

Ar = Ph racemic

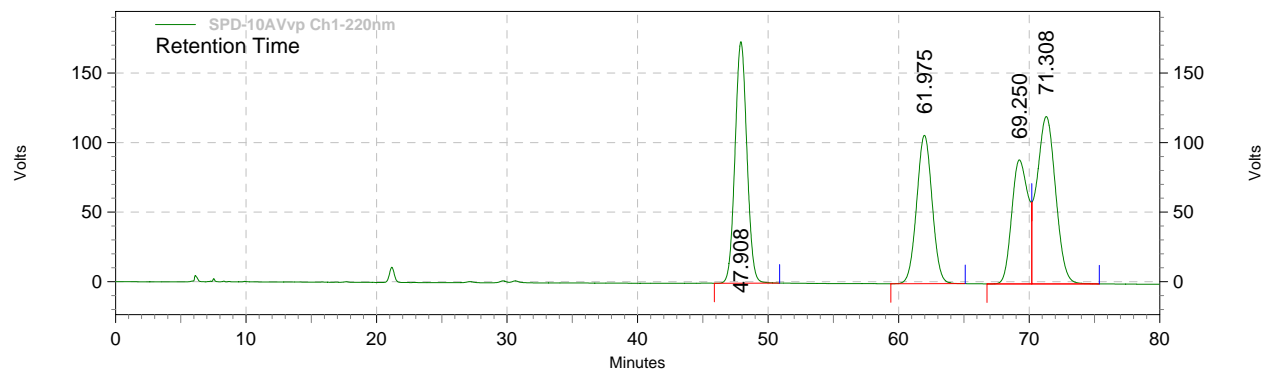

**SPD-10AVvp**  
**Ch1-220nm**  
**Results**

| Retention Time | Area     | Area % | Height | Height % |
|----------------|----------|--------|--------|----------|
| 47.908         | 10981114 | 27.73  | 173608 | 35.44    |
| 61.975         | 8793983  | 22.20  | 106738 | 21.79    |
| 69.250         | 7775129  | 19.63  | 89132  | 18.20    |
| 71.308         | 12053502 | 30.44  | 120347 | 24.57    |
| Totals         | 39603728 | 100.00 | 489825 | 100.00   |

## Area % Report

Method Name: C:\EZStart\Projects\Default\Methods\AS.met  
 Data: C:\EZStart\Projects\Default\Data\V-SS-75  
 User: System  
 Acquired: 4/17/2006 12:06:24 PM  
 Printed: 4/25/2007 2:04:43 PM

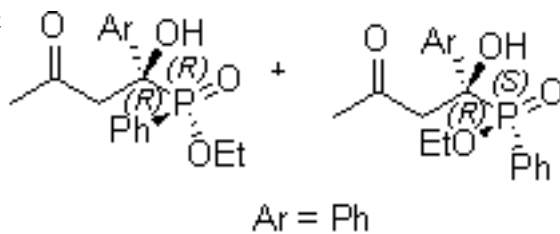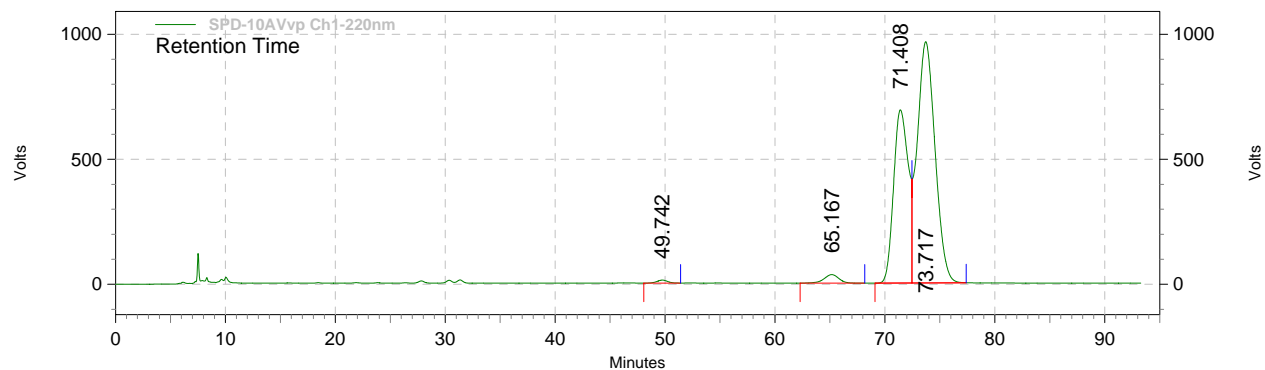

### SPD-10AVvp Ch1-220nm Results

| Retention Time | Area      | Area % | Height  | Height % |
|----------------|-----------|--------|---------|----------|
| 49.742         | 799069    | 0.45   | 11878   | 0.70     |
| 65.167         | 3157296   | 1.78   | 34035   | 2.00     |
| 71.408         | 64541546  | 36.36  | 692571  | 40.67    |
| 73.717         | 108989234 | 61.41  | 964603  | 56.64    |
| Totals         | 177487145 | 100.00 | 1703087 | 100.00   |

**Area % Report**

Method Name: C:\EZStart\Projects\Default\Methods\AS.met  
 Data: C:\EZStart\Projects\Default\Data\V-SS-79C  
 User: System  
 Acquired: 4/20/2006 12:39:20 PM  
 Printed: 4/25/2007 2:07:12 PM

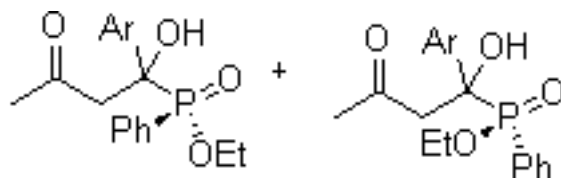

Ar = 4-F-Ph racemic

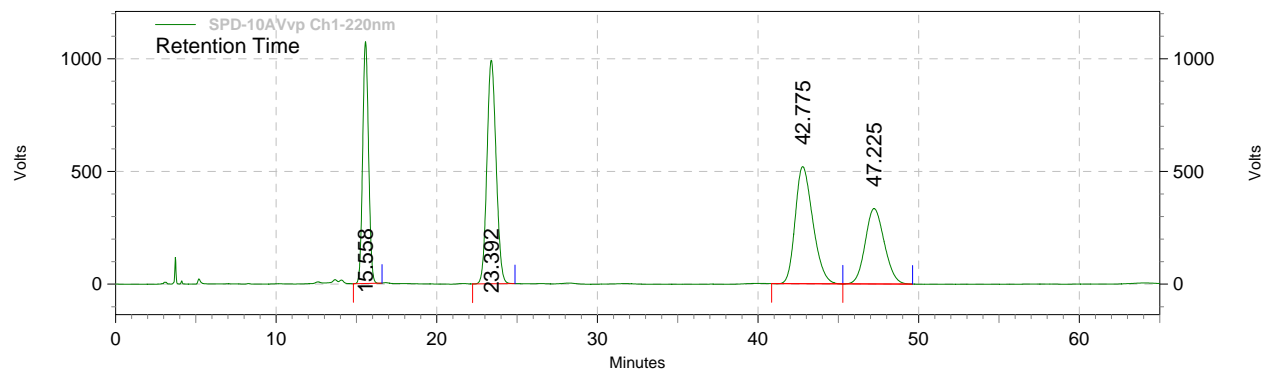

SPD-10AVvp  
 Ch1-220nm  
 Results

| Retention Time | Area      | Area % | Height  | Height % |
|----------------|-----------|--------|---------|----------|
| 15.558         | 27434842  | 20.44  | 1072464 | 36.74    |
| 23.392         | 39490664  | 29.43  | 992036  | 33.99    |
| 42.775         | 39609775  | 29.52  | 519744  | 17.81    |
| 47.225         | 27662953  | 20.61  | 334696  | 11.47    |
| Totals         | 134198234 | 100.00 | 2918940 | 100.00   |

**Area % Report**

Method Name: C:\EZStart\Projects\Default\Methods\AS.met  
 Data: C:\EZStart\Projects\Default\Data\V-SS-81B  
 User: System  
 Acquired: 4/24/2006 11:56:20 AM  
 Printed: 4/25/2007 2:06:24 PM

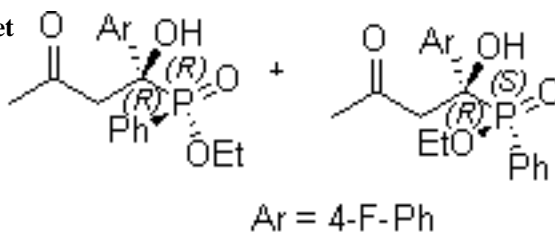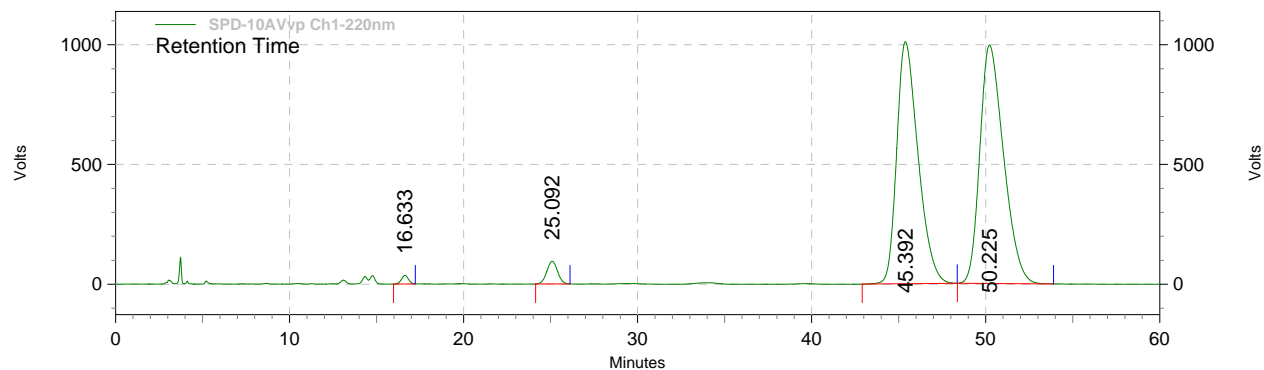

**SPD-10AVvp  
 Ch1-220nm  
 Results**

| Retention Time | Area      | Area % | Height  | Height % |
|----------------|-----------|--------|---------|----------|
| 16.633         | 999895    | 0.54   | 35489   | 1.66     |
| 25.092         | 4061528   | 2.19   | 94515   | 4.43     |
| 45.392         | 86176162  | 46.44  | 1010200 | 47.30    |
| 50.225         | 94307892  | 50.83  | 995574  | 46.61    |
| Totals         | 185545477 | 100.00 | 2135778 | 100.00   |

**Area % Report**

Method Name: C:\EZStart\Projects\Default\Methods\AS.met  
 Data: C:\EZStart\Projects\Default\Data\V-SS-138A  
 User: System  
 Acquired: 5/31/2006 2:02:20 PM  
 Printed: 4/25/2007 2:08:09 PM

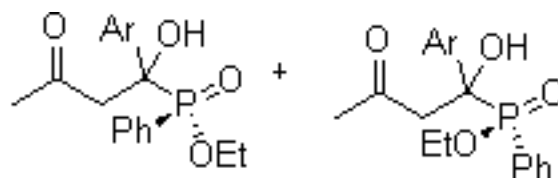

Ar = 3-F-Ph racemic

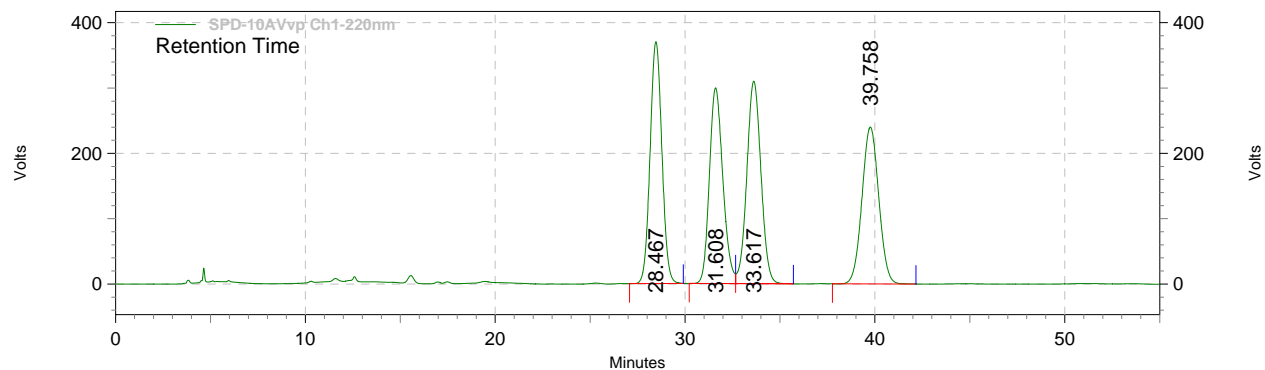

**SPD-10AVvp**  
**Ch1-220nm**  
**Results**

| Retention Time | Area     | Area % | Height  | Height % |
|----------------|----------|--------|---------|----------|
| 28.467         | 15945462 | 25.92  | 369993  | 30.34    |
| 31.608         | 14739673 | 23.96  | 299485  | 24.56    |
| 33.617         | 16067412 | 26.12  | 309925  | 25.41    |
| 39.758         | 14760819 | 24.00  | 240148  | 19.69    |
| Totals         | 61513366 | 100.00 | 1219551 | 100.00   |

## Area % Report

**Method Name:** C:\EZStart\Projects\Default\Methods\AS.met  
**Data:** C:\EZStart\Projects\Default\Data\V-SS-140F  
**User:** System  
**Acquired:** 6/6/2006 2:09:37 PM  
**Printed:** 4/25/2007 2:09:20 PM

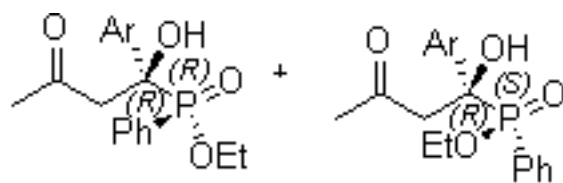

Ar = 3-F-Ph

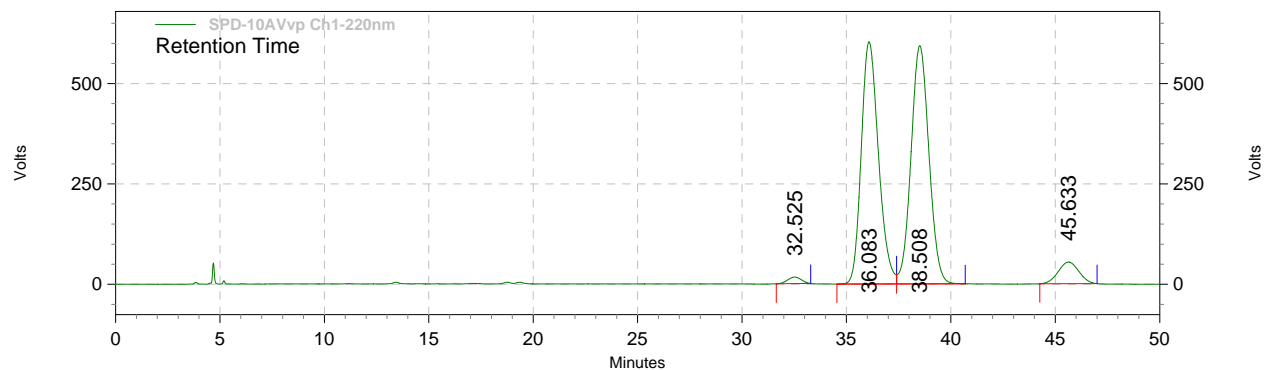

### SPD-10AVvp Ch1-220nm Results

| Retention Time | Area            | Area %        | Height         | Height %      |
|----------------|-----------------|---------------|----------------|---------------|
| 32.525         | 745767          | 1.00          | 16276          | 1.28          |
| 36.083         | 34534551        | 46.45         | 603361         | 47.63         |
| 38.508         | 35366780        | 47.57         | 593345         | 46.84         |
| 45.633         | 3701735         | 4.98          | 53844          | 4.25          |
| <b>Totals</b>  | <b>74348833</b> | <b>100.00</b> | <b>1266826</b> | <b>100.00</b> |

**Area % Report**

Method Name: C:\EZStart\Projects\Default\Methods\AS.met  
 Data: C:\EZStart\Projects\Default\Data\v-ss-92l  
 User: System  
 Acquired: 4/27/2006 2:23:27 PM  
 Printed: 4/25/2007 2:10:32 PM

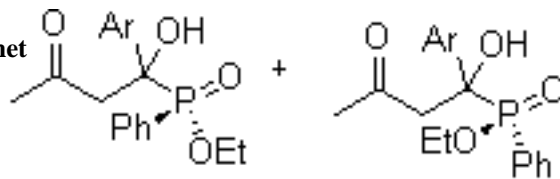

Ar = 4-Br-Ph racemic

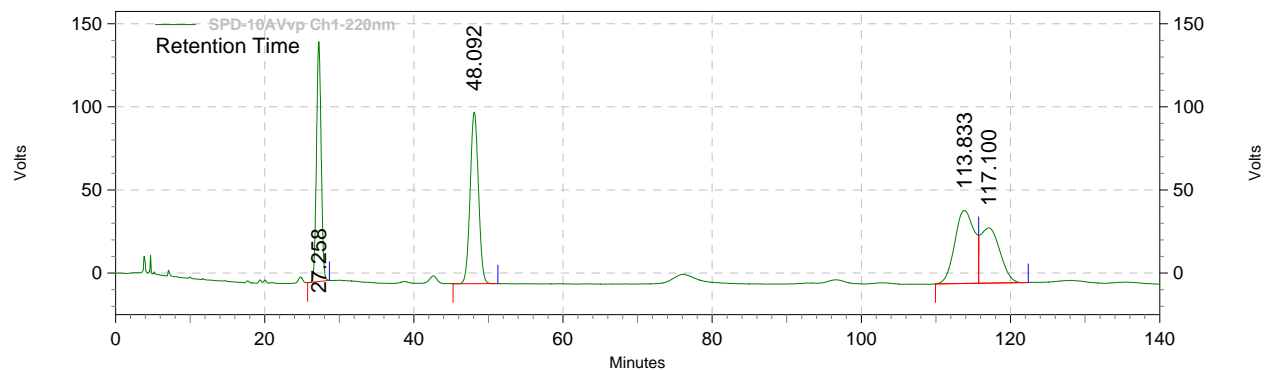

SPD-10AVvp  
 Ch1-220nm  
 Results

| Retention Time | Area     | Area % | Height | Height % |
|----------------|----------|--------|--------|----------|
| 27.258         | 6307405  | 22.20  | 144252 | 44.42    |
| 48.092         | 8022192  | 28.24  | 103296 | 31.81    |
| 113.833        | 8053997  | 28.35  | 43919  | 13.52    |
| 117.100        | 6026061  | 21.21  | 33258  | 10.24    |
| Totals         | 28409655 | 100.00 | 324725 | 100.00   |

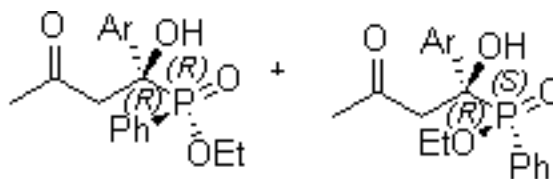

## Area % Report

Ar = 4-Br-Ph; L-Proline

Method Name: C:\EZStart\Projects\Default\Methods\AS.met  
 Data: C:\EZStart\Projects\Default\Data\V-SS-99A  
 User: System  
 Acquired: 5/3/2006 10:44:43 AM  
 Printed: 4/25/2007 2:11:19 PM

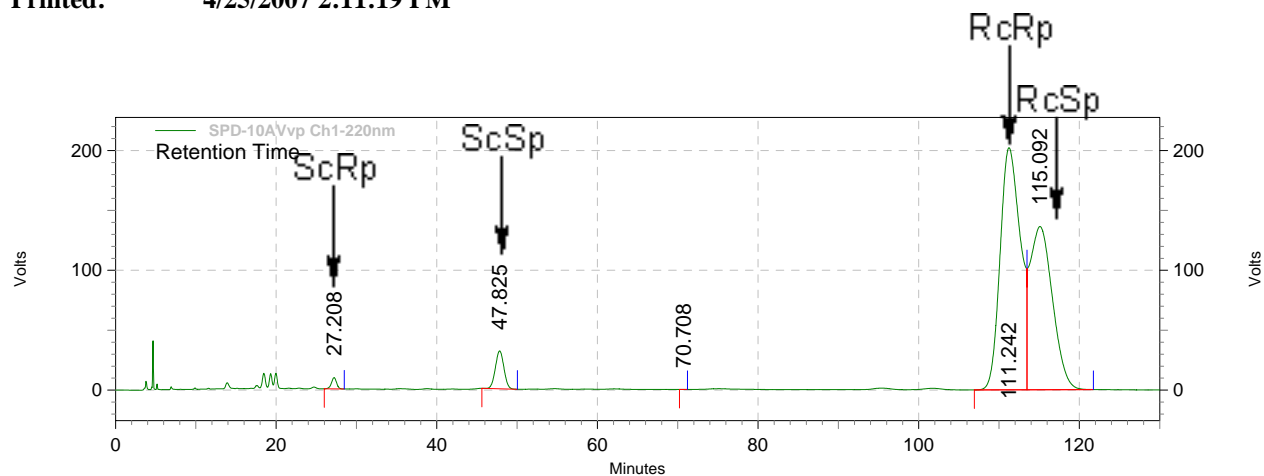

SPD-10AVvp  
 Ch1-220nm  
 Results

| Retention Time | Area     | Area % | Height | Height % |
|----------------|----------|--------|--------|----------|
| 27.208         | 419158   | 0.65   | 9420   | 2.48     |
| 47.825         | 2332862  | 3.61   | 31592  | 8.33     |
| 70.708         | 834      | 0.00   | 28     | 0.01     |
| 111.242        | 35326343 | 54.61  | 202051 | 53.27    |
| 115.092        | 26614828 | 41.14  | 136197 | 35.91    |

|        |          |        |        |        |
|--------|----------|--------|--------|--------|
| Totals | 64694025 | 100.00 | 379288 | 100.00 |
|--------|----------|--------|--------|--------|



## Area % Report

Method Name: C:\EZStart\Projects\Default\Methods\AS.met

Data: C:\EZStart\Projects\Default\Data\vi-ss-100

User: System

Acquired: 10/10/2006 9:59:16 AM

Printed: 4/25/2007 2:12:24 PM

ScRp ScSp

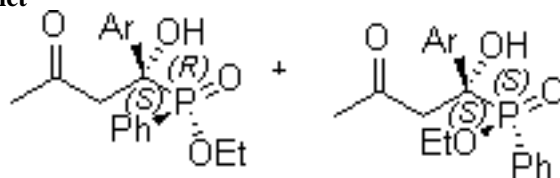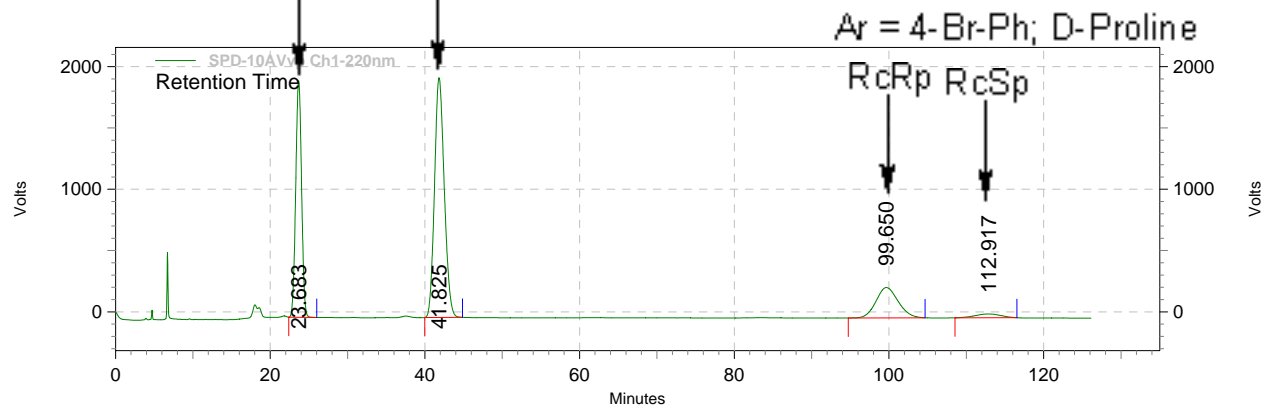

SPD-10AVvp

Ch1-220nm

Results

| Retention Time | Area      | Area % | Height  | Height % |
|----------------|-----------|--------|---------|----------|
| 23.683         | 101402953 | 30.78  | 1929494 | 46.34    |
| 41.825         | 171735609 | 52.14  | 1955603 | 46.97    |
| 99.650         | 49182378  | 14.93  | 247436  | 5.94     |
| 112.917        | 7077277   | 2.15   | 30915   | 0.74     |

|        |           |        |         |        |
|--------|-----------|--------|---------|--------|
| Totals | 329398217 | 100.00 | 4163448 | 100.00 |
|--------|-----------|--------|---------|--------|

**Area % Report**

Method Name: C:\EZStart\Projects\Default\Methods\AS.met  
 Data: C:\EZStart\Projects\Default\Data\v-ss-861  
 User: System  
 Acquired: 4/25/2006 1:03:52 PM  
 Printed: 4/25/2007 2:17:34 PM

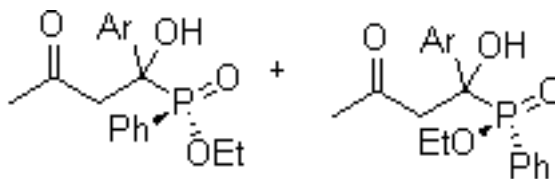

Ar = 4-Cl-Ph racemic

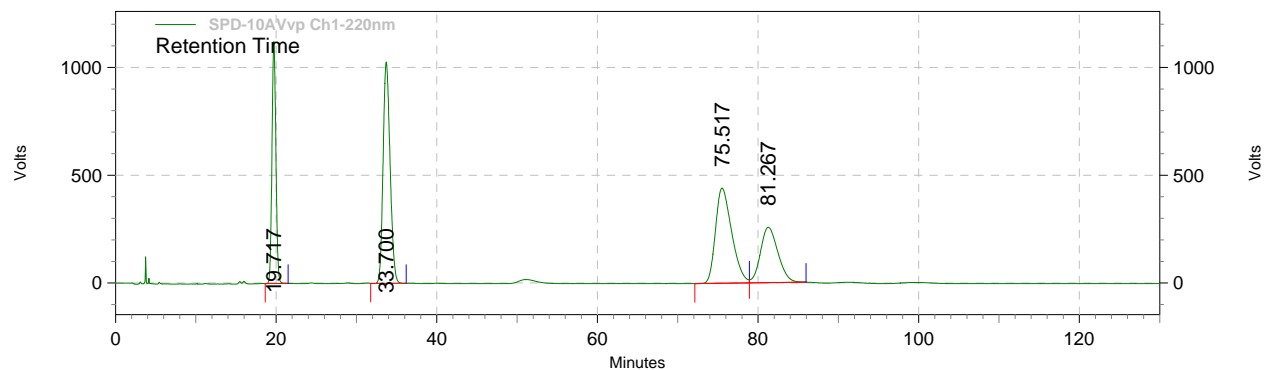

**SPD-10AVvp**  
**Ch1-220nm**  
**Results**

| Retention Time | Area      | Area % | Height  | Height % |
|----------------|-----------|--------|---------|----------|
| 19.717         | 38032132  | 18.96  | 1121651 | 39.40    |
| 33.700         | 62068400  | 30.95  | 1026667 | 36.07    |
| 75.517         | 61763941  | 30.80  | 441468  | 15.51    |
| 81.267         | 38690976  | 19.29  | 256714  | 9.02     |
| Totals         | 200555449 | 100.00 | 2846500 | 100.00   |

## Area % Report

Method Name: C:\EZStart\Projects\Default\Methods\AS.met  
 Data: C:\EZStart\Projects\Default\Data\V-SS-88E  
 User: System  
 Acquired: 4/30/2006 1:37:19 PM  
 Printed: 4/25/2007 2:18:59 PM

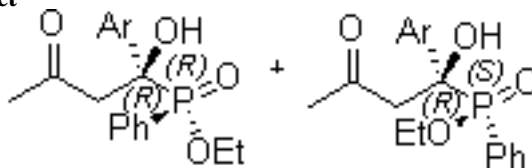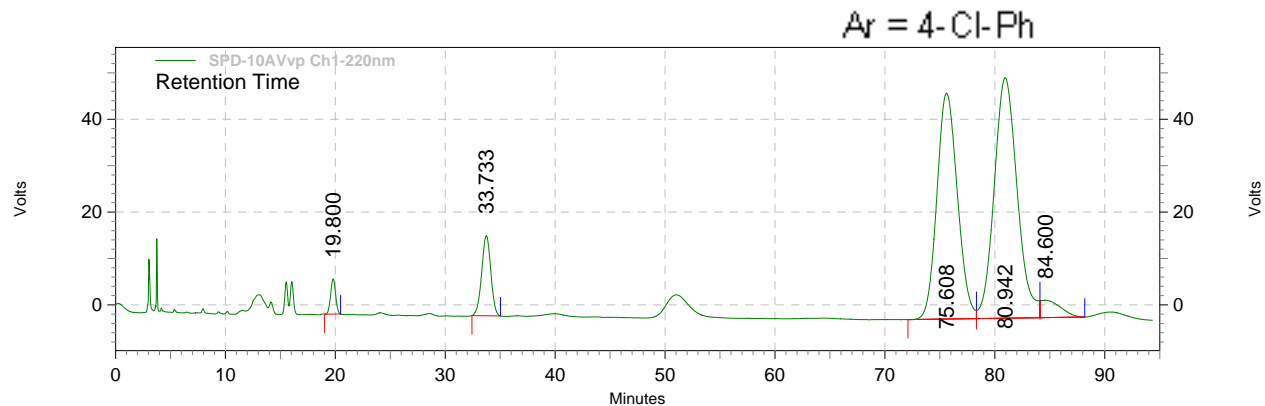

### SPD-10AVvp Ch1-220nm Results

| Retention Time | Area     | Area % | Height | Height % |
|----------------|----------|--------|--------|----------|
| 19.800         | 240142   | 1.54   | 7583   | 5.87     |
| 33.733         | 994355   | 6.39   | 17251  | 13.36    |
| 75.608         | 6314780  | 40.59  | 48672  | 37.71    |
| 80.942         | 7538385  | 48.46  | 51830  | 40.15    |
| 84.600         | 468849   | 3.01   | 3746   | 2.90     |
| Totals         | 15556511 | 100.00 | 129082 | 100.00   |

**Area % Report**

Method Name: C:\EZStart\Projects\Default\Methods\AS.met  
 Data: C:\EZStart\Projects\Default\Data\V-SS-154L  
 User: System  
 Acquired: 6/13/2006 10:56:50 AM  
 Printed: 4/25/2007 2:19:47 PM

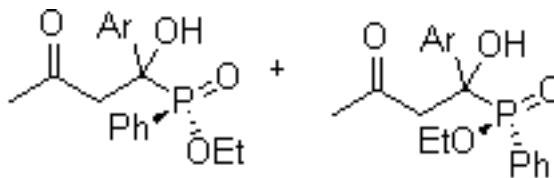

Ar = 3-Cl-Ph racemic

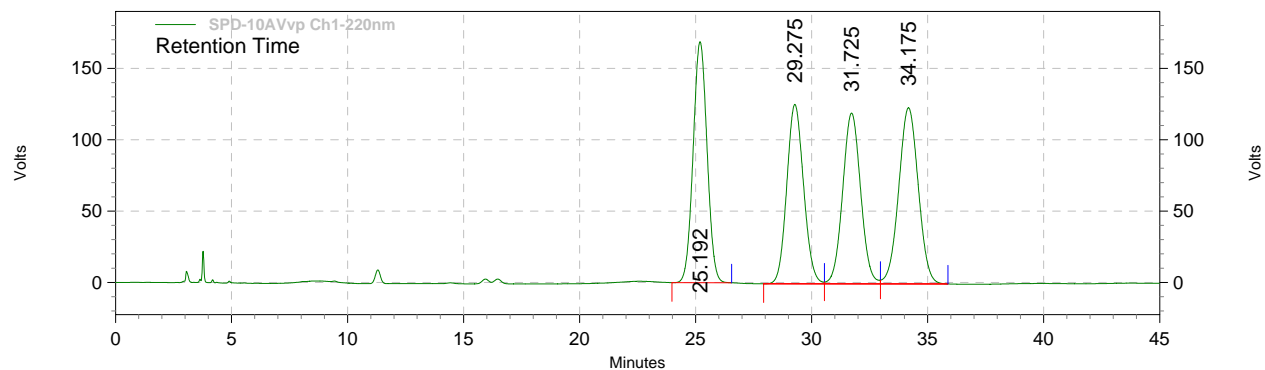

**SPD-10AVvp**  
**Ch1-220nm**  
**Results**

| Retention Time | Area     | Area % | Height | Height % |
|----------------|----------|--------|--------|----------|
| 25.192         | 7062498  | 26.10  | 168784 | 31.40    |
| 29.275         | 6333169  | 23.40  | 125683 | 23.38    |
| 31.725         | 6432760  | 23.77  | 119636 | 22.26    |
| 34.175         | 7235102  | 26.73  | 123404 | 22.96    |
| Totals         | 27063529 | 100.00 | 537507 | 100.00   |

## Area % Report

**Method Name:** C:\EZStart\Projects\Default\Methods\AS.met  
**Data:** C:\EZStart\Projects\Default\Data\V-SS-156L1  
**User:** System  
**Acquired:** 6/15/2006 12:32:36 PM  
**Printed:** 4/25/2007 2:20:28 PM

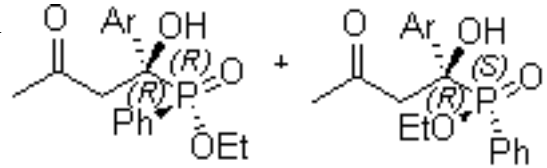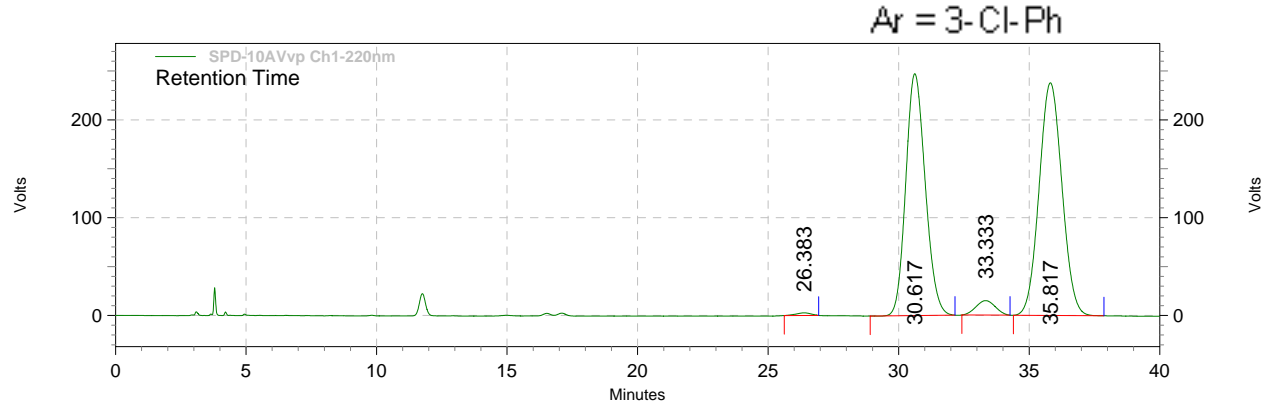

**SPD-10AVvp**  
**Ch1-220nm**  
**Results**

| Retention Time | Area     | Area % | Height | Height % |
|----------------|----------|--------|--------|----------|
| 26.383         | 104686   | 0.37   | 2609   | 0.52     |
| 30.617         | 12843101 | 45.54  | 247344 | 49.20    |
| 33.333         | 758992   | 2.69   | 14771  | 2.94     |
| 35.817         | 14492010 | 51.39  | 238012 | 47.34    |
| Totals         | 28198789 | 100.00 | 502736 | 100.00   |

## Area % Report

**Method Name:** C:\EZStart\Projects\Default\Methods\AS.met  
**Data:** C:\EZStart\Projects\Default\Data\v-ss-13411  
**User:** System  
**Acquired:** 5/29/2006 12:21:34 PM  
**Printed:** 4/25/2007 2:23:51 PM

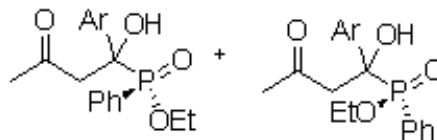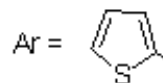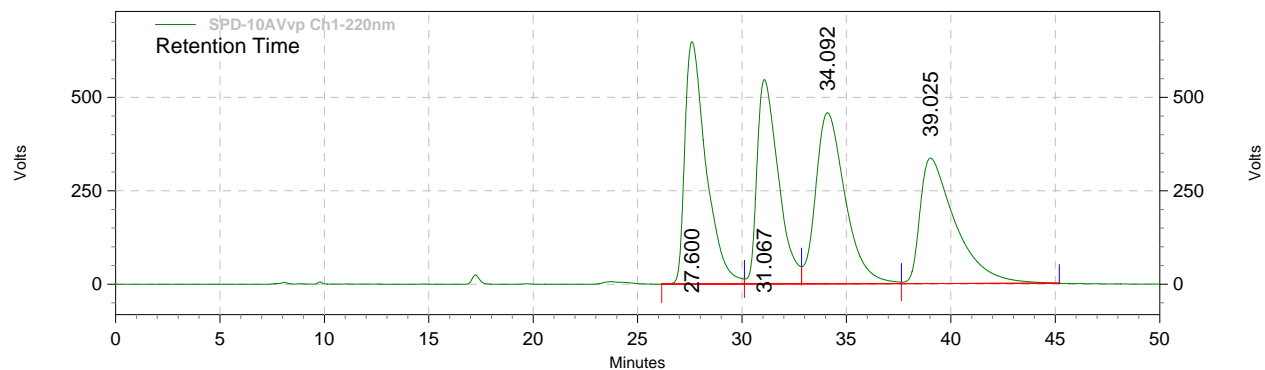

### SPD-10AVvp Ch1-220nm Results

| Retention Time | Area             | Area %        | Height         | Height %      |
|----------------|------------------|---------------|----------------|---------------|
| 27.600         | 45630886         | 27.04         | 648373         | 32.61         |
| 31.067         | 38918762         | 23.06         | 546719         | 27.49         |
| 34.092         | 44731312         | 26.51         | 457695         | 23.02         |
| 39.025         | 39464526         | 23.39         | 335664         | 16.88         |
| <b>Totals</b>  | <b>168745486</b> | <b>100.00</b> | <b>1988451</b> | <b>100.00</b> |

## Area % Report

**Method Name:** C:\EZStart\Projects\Default\Methods\AS.met  
**Data:** C:\EZStart\Projects\Default\Data\v-ss-137  
**User:** System  
**Acquired:** 5/31/2006 10:27:36 AM  
**Printed:** 4/25/2007 2:24:30 PM

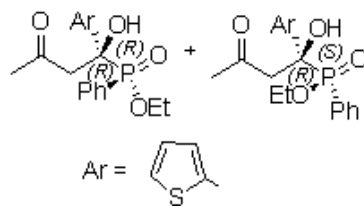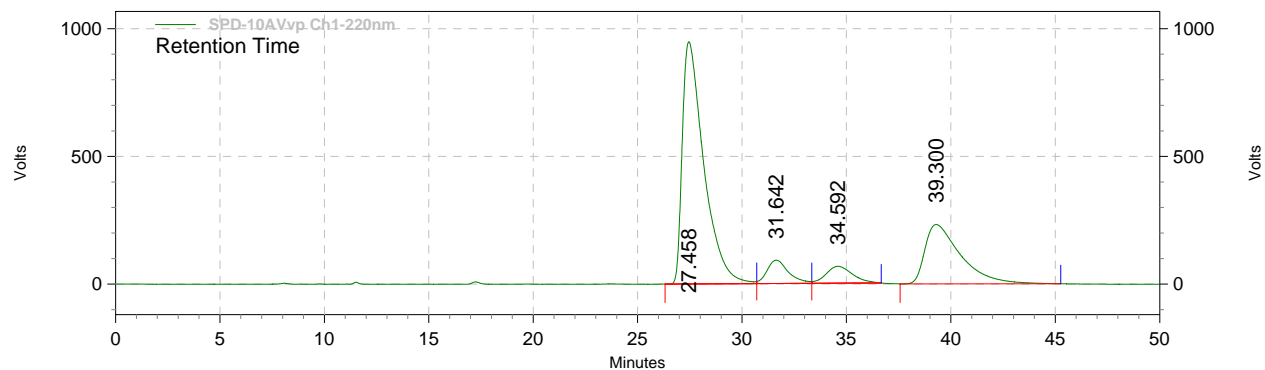

### SPD-10AVvp Ch1-220nm Results

| Retention Time | Area      | Area % | Height  | Height % |
|----------------|-----------|--------|---------|----------|
| 27.458         | 67944771  | 62.94  | 948585  | 70.85    |
| 31.642         | 6534725   | 6.05   | 91604   | 6.84     |
| 34.592         | 5826399   | 5.40   | 66246   | 4.95     |
| 39.300         | 27651497  | 25.61  | 232393  | 17.36    |
| Totals         | 107957392 | 100.00 | 1338828 | 100.00   |

**Area % Report**

Method Name: C:\EZStart\Projects\Default\Methods\AS.met  
 Data: C:\EZStart\Projects\Default\Data\V-SS-89B  
 User: System  
 Acquired: 5/2/2006 11:59:38 AM  
 Printed: 4/25/2007 2:21:08 PM

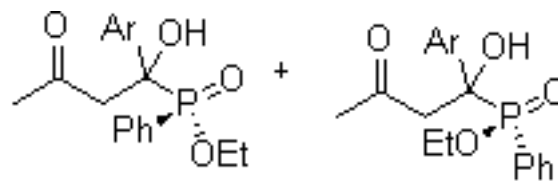

Ar = 4-Me-Ph, Racemic

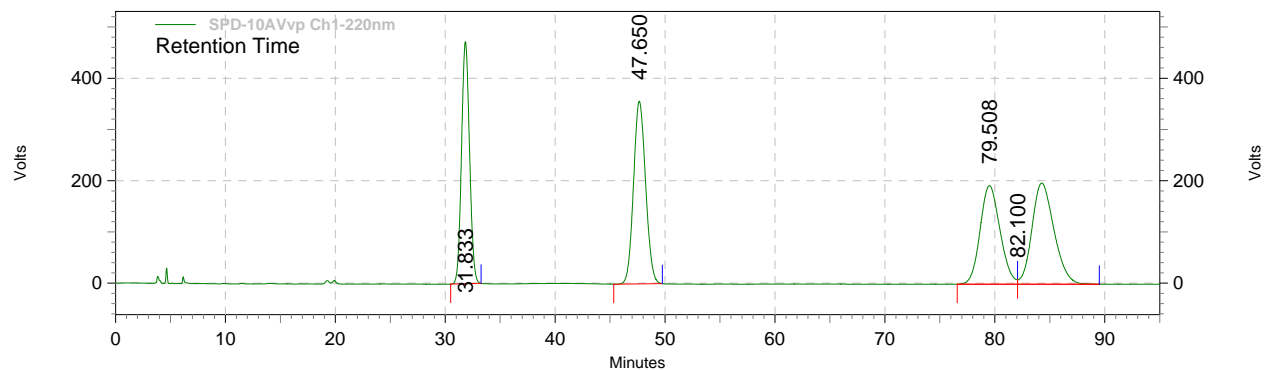

**SPD-10AVvp  
 Ch1-220nm  
 Results**

| Retention Time | Area      | Area % | Height  | Height % |
|----------------|-----------|--------|---------|----------|
| 31.833         | 23980714  | 23.32  | 472371  | 45.85    |
| 47.650         | 27232695  | 26.48  | 356842  | 34.63    |
| 79.508         | 24184872  | 23.52  | 192378  | 18.67    |
| 82.100         | 27444434  | 26.69  | 8773    | 0.85     |
| Totals         | 102842715 | 100.00 | 1030364 | 100.00   |



**Area % Report**

Method Name: C:\EZStart\Projects\Default\Methods\AS.met  
 Data: C:\EZStart\Projects\Default\Data\V-SS-90  
 User: System  
 Acquired: 5/2/2006 10:25:08 AM  
 Printed: 4/25/2007 2:21:34 PM

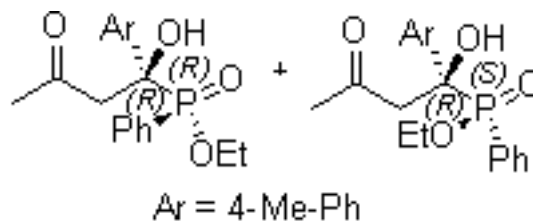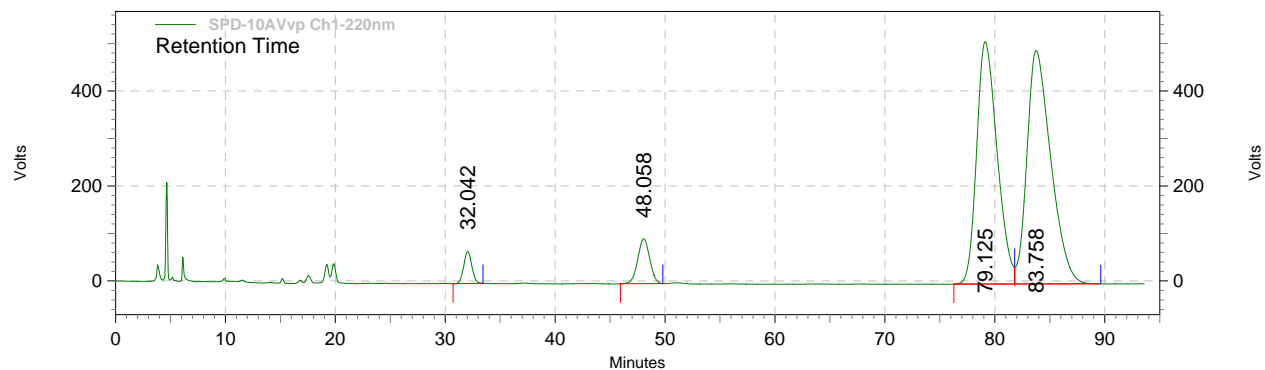

**SPD-10AVvp**  
**Ch1-220nm**  
**Results**

| Retention Time | Area      | Area % | Height  | Height % |
|----------------|-----------|--------|---------|----------|
| 32.042         | 3468253   | 2.30   | 67253   | 5.78     |
| 48.058         | 7193972   | 4.76   | 94558   | 8.13     |
| 79.125         | 66117640  | 43.79  | 510403  | 43.86    |
| 83.758         | 74215288  | 49.15  | 491404  | 42.23    |
| Totals         | 150995153 | 100.00 | 1163618 | 100.00   |

**Area % Report**

**Method Name:** C:\EZStart\Projects\Default\Methods\AS.met  
**Data:** C:\EZStart\Projects\Default\Data\V-SS-94L  
**User:** System  
**Acquired:** 5/1/2006 2:11:41 PM  
**Printed:** 4/25/2007 2:22:27 PM

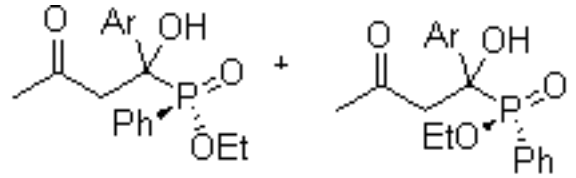

Ar = 4-MeO-Ph, Racemic

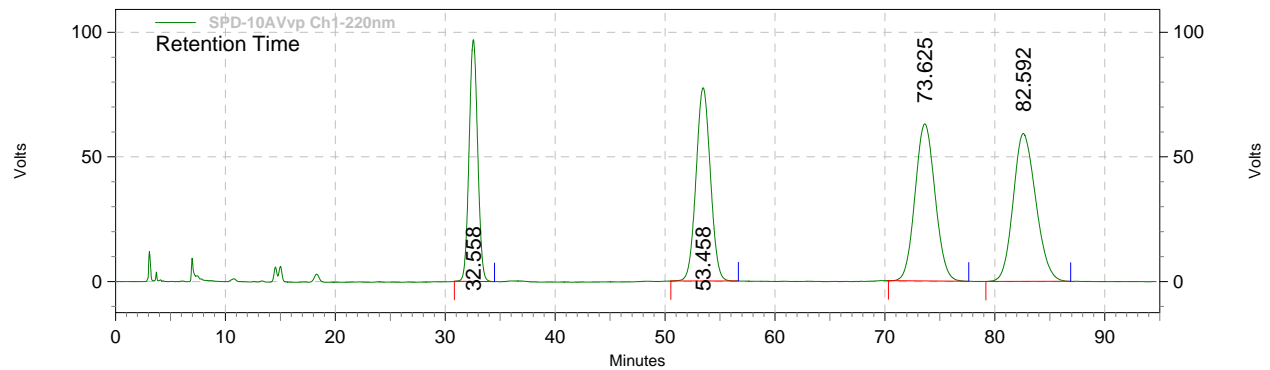

**SPD-10AVvp**  
**Ch1-220nm**  
**Results**

| Retention Time | Area     | Area % | Height | Height % |
|----------------|----------|--------|--------|----------|
| 32.558         | 5287035  | 18.38  | 96981  | 32.68    |
| 53.458         | 7033213  | 24.45  | 77522  | 26.12    |
| 73.625         | 7963523  | 27.69  | 62982  | 21.22    |
| 82.592         | 8480119  | 29.48  | 59319  | 19.99    |
| Totals         | 28763890 | 100.00 | 296804 | 100.00   |

## Area % Report

**Method Name:** C:\EZStart\Projects\Default\Methods\AS.met  
**Data:** C:\EZStart\Projects\Default\Data\V-SS-90  
**User:** System  
**Acquired:** 5/2/2006 10:25:08 AM  
**Printed:** 4/25/2007 2:21:34 PM

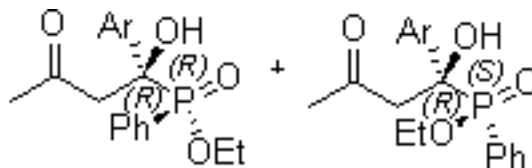

Ar = 4-MeO-Ph

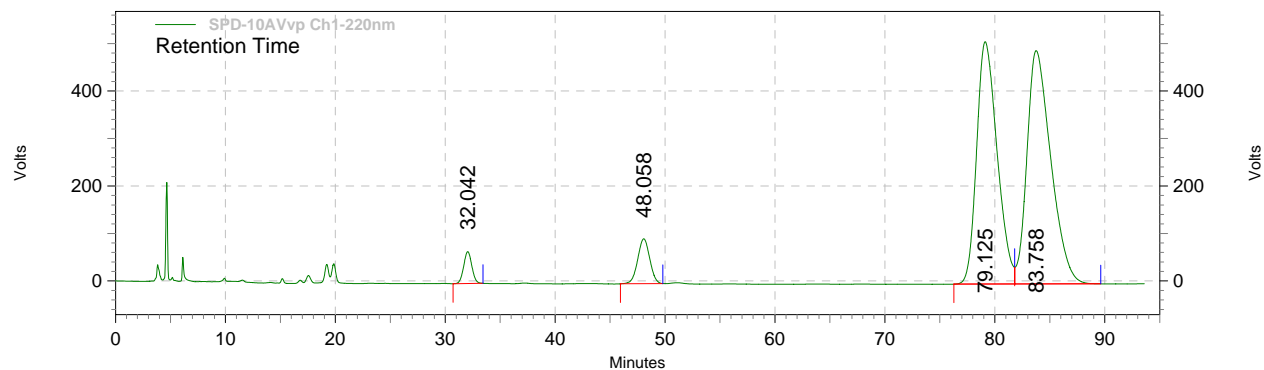

### SPD-10AVvp Ch1-220nm Results

| Retention Time | Area      | Area % | Height  | Height % |
|----------------|-----------|--------|---------|----------|
| 32.042         | 3468253   | 2.30   | 67253   | 5.78     |
| 48.058         | 7193972   | 4.76   | 94558   | 8.13     |
| 79.125         | 66117640  | 43.79  | 510403  | 43.86    |
| 83.758         | 74215288  | 49.15  | 491404  | 42.23    |
| Totals         | 150995153 | 100.00 | 1163618 | 100.00   |

**Area % Report**

Method Name: C:\EZStart\Projects\Default\Methods\AS.met  
 Data: C:\EZStart\Projects\Default\Data\V-SS-113L1  
 User: System  
 Acquired: 5/17/2006 2:41:11 PM  
 Printed: 4/25/2007 2:25:32 PM

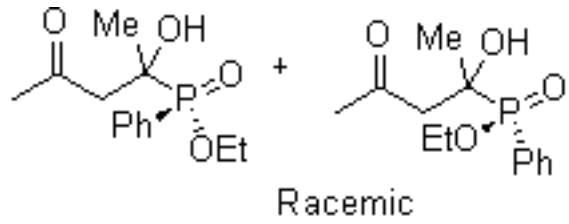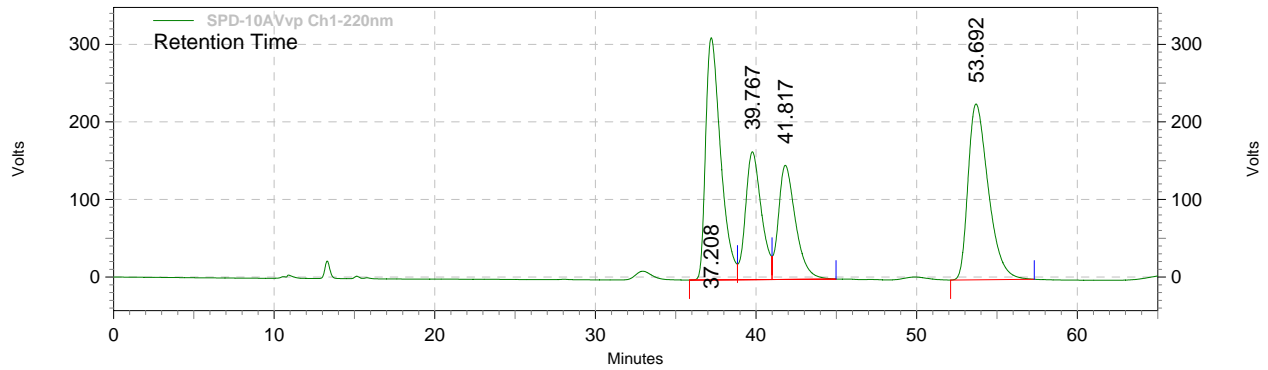

**SPD-10AVvp  
 Ch1-220nm  
 Results**

| Retention Time | Area     | Area % | Height | Height % |
|----------------|----------|--------|--------|----------|
| 37.208         | 20294461 | 32.50  | 312190 | 36.70    |
| 39.767         | 11365945 | 18.20  | 164745 | 19.37    |
| 41.817         | 10938901 | 17.52  | 147105 | 17.29    |
| 53.692         | 19840435 | 31.78  | 226670 | 26.64    |
| Totals         | 62439742 | 100.00 | 850710 | 100.00   |

## Area % Report

Method Name: C:\EZStart\Projects\Default\Methods\AS.met  
 Data: C:\EZStart\Projects\Default\Data\V-SS-120A  
 User: System  
 Acquired: 5/23/2006 2:42:19 PM  
 Printed: 4/25/2007 2:26:08 PM

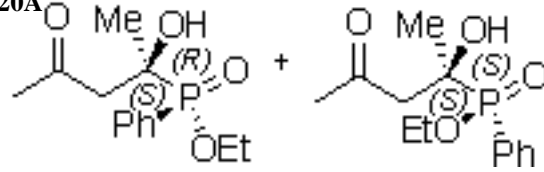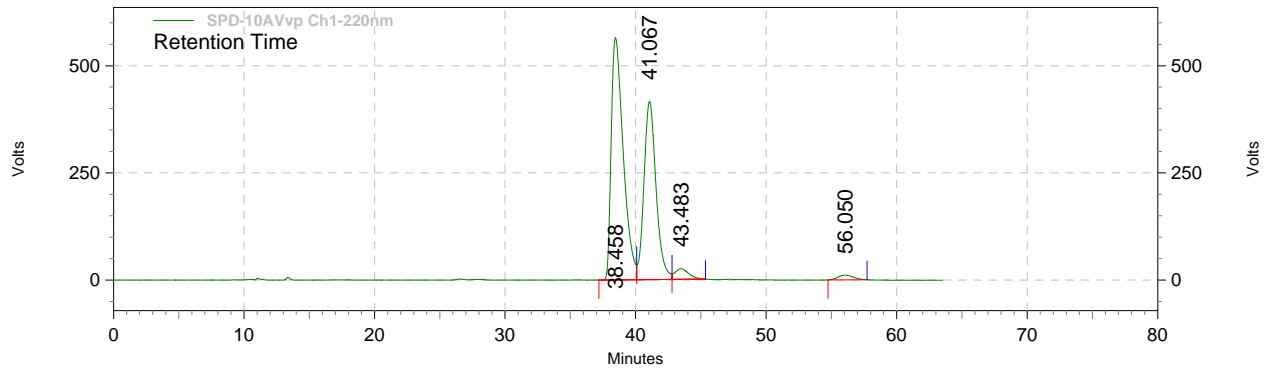

### SPD-10AVvp Ch1-220nm Results

| Retention Time | Area     | Area % | Height  | Height % |
|----------------|----------|--------|---------|----------|
| 38.458         | 36110687 | 54.96  | 565118  | 55.59    |
| 41.067         | 26860891 | 40.88  | 415656  | 40.89    |
| 43.483         | 1833955  | 2.79   | 24696   | 2.43     |
| 56.050         | 899373   | 1.37   | 11089   | 1.09     |
| Totals         | 65704906 | 100.00 | 1016559 | 100.00   |

## Area % Report

**Method Name:** C:\EZStart\Projects\Default\Methods\AS.met  
**Data:** C:\EZStart\Projects\Default\Data\V-SS-119L  
**User:** System  
**Acquired:** 5/19/2006 12:37:16 PM  
**Printed:** 4/25/2007 2:27:17 PM

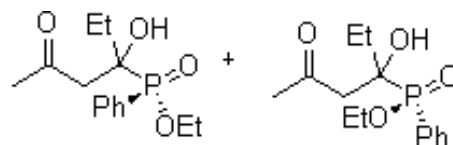

Racemic compounds are separated by two different columns.

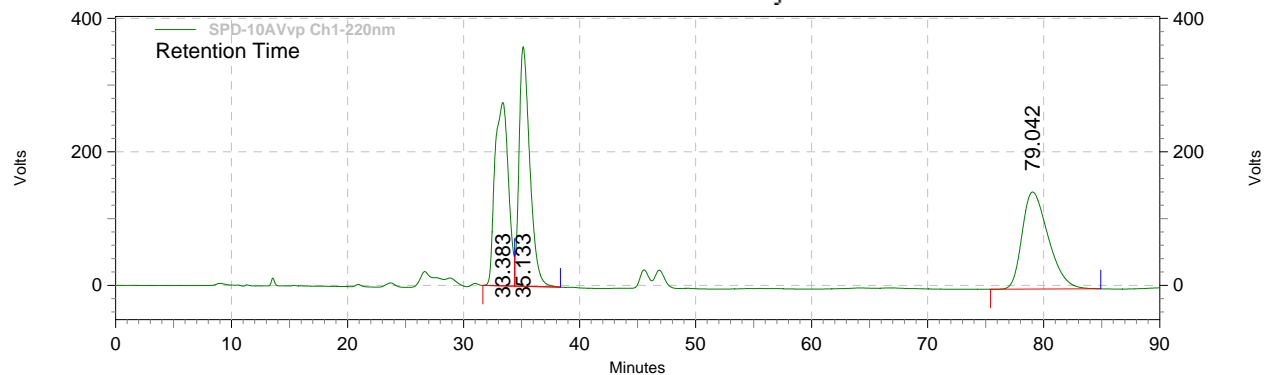

### SPD-10AVvp Ch1-220nm Results

| Retention Time | Area     | Area % | Height | Height % |
|----------------|----------|--------|--------|----------|
| 33.383         | 22240491 | 32.61  | 274797 | 35.26    |
| 35.133         | 23080693 | 33.84  | 358959 | 46.06    |
| 79.042         | 22878779 | 33.55  | 145521 | 18.67    |
| Totals         | 68199963 | 100.00 | 779277 | 100.00   |

## Area % Report

Method Name: C:\EZStart\Projects\Default\Methods\AS.met

Data: C:\EZStart\Projects\Default\Data\V-SS-123A

User: System

Acquired: 5/22/2006 11:36:04 AM

Printed: 4/25/2007 2:30:43 PM

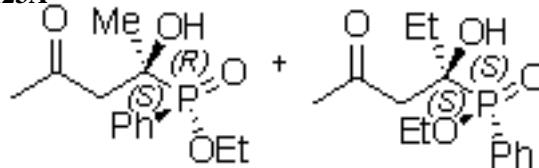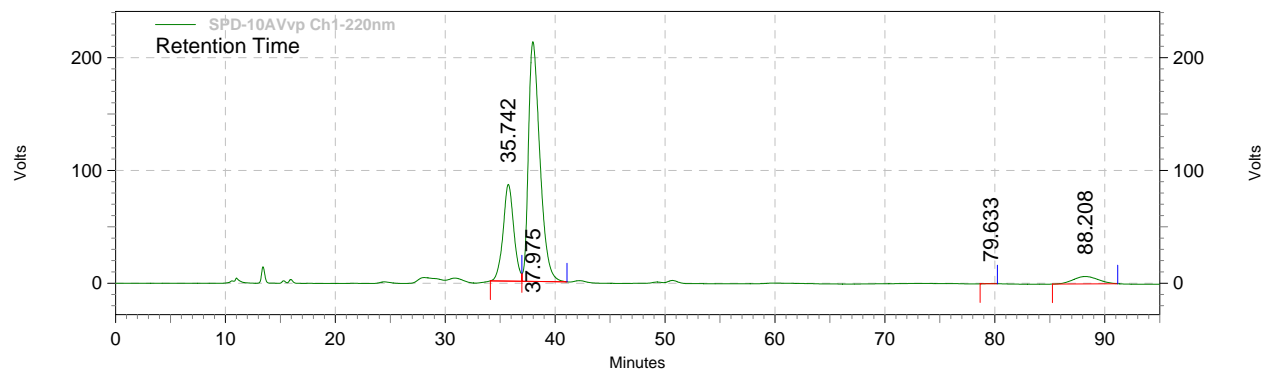

### SPD-10AVvp

#### Ch1-220nm

#### Results

| Retention Time | Area     | Area % | Height | Height % |
|----------------|----------|--------|--------|----------|
| 35.742         | 5805011  | 26.05  | 85806  | 28.12    |
| 37.975         | 15425090 | 69.22  | 212565 | 69.67    |
| 79.633         | 7828     | 0.04   | 133    | 0.04     |
| 88.208         | 1045787  | 4.69   | 6597   | 2.16     |
| Totals         | 22283716 | 100.00 | 305101 | 100.00   |

## Area % Report

**Method Name:** C:\EZStart\Projects\Default\Methods\AS.met  
**Data:** C:\EZStart\Projects\Default\Data\V-SS-119L2  
**User:** System  
**Acquired:** 5/19/2006 4:08:50 PM  
**Printed:** 4/25/2007 2:32:07 PM

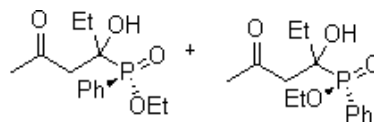

Racemic compounds are separated by two different columns.

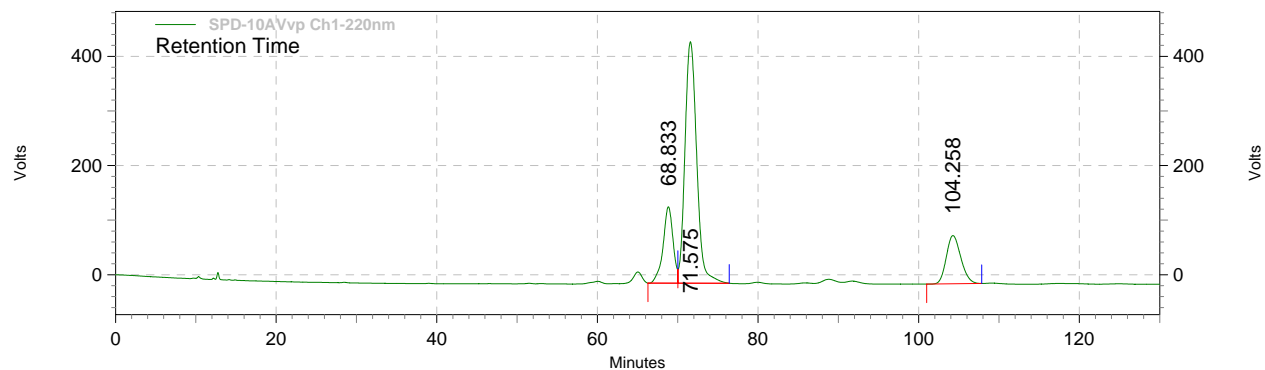

**SPD-10AVvp**  
**Ch1-220nm**  
**Results**

| Retention Time | Area     | Area % | Height | Height % |
|----------------|----------|--------|--------|----------|
| 68.833         | 12086724 | 17.73  | 139921 | 20.87    |
| 71.575         | 45002937 | 66.01  | 442116 | 65.94    |
| 104.258        | 11088654 | 16.26  | 88443  | 13.19    |
| Totals         | 68178315 | 100.00 | 670480 | 100.00   |



## Area % Report

**Method Name:** C:\EZStart\Projects\Default\Methods\AS.met  
**Data:** C:\EZStart\Projects\Default\Data\V-SS-123(AD-L1)  
**User:** System  
**Acquired:** 5/24/2006 4:24:44 PM  
**Printed:** 4/25/2007 2:33:43 PM

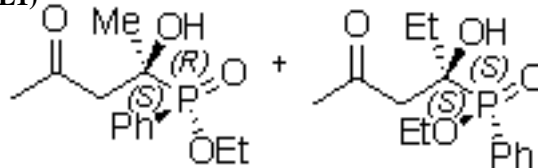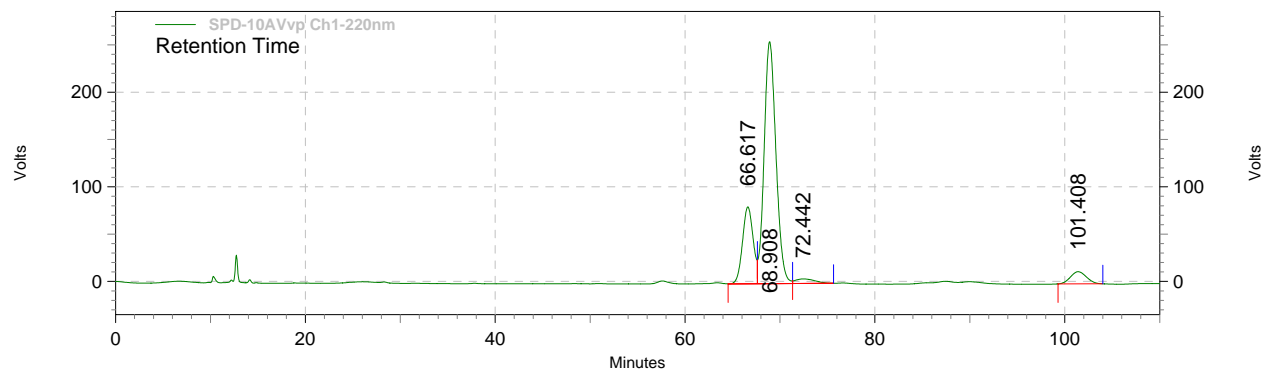

### SPD-10AVvp Ch1-220nm Results

| Retention Time | Area     | Area % | Height | Height % |
|----------------|----------|--------|--------|----------|
| 66.617         | 6327760  | 20.61  | 81314  | 22.92    |
| 68.908         | 22171556 | 72.23  | 255721 | 72.09    |
| 72.442         | 680911   | 2.22   | 4810   | 1.36     |
| 101.408        | 1517160  | 4.94   | 12891  | 3.63     |
| Totals         | 30697387 | 100.00 | 354736 | 100.00   |

## Area % Report

**Method Name:** C:\EZStart\Projects\Default\Methods\AS.met  
**Data:** C:\EZStart\Projects\Default\Data\VI-SS-L  
**User:** System  
**Acquired:** 7/13/2006 10:06:27 AM  
**Printed:** 4/25/2007 2:35:10 PM

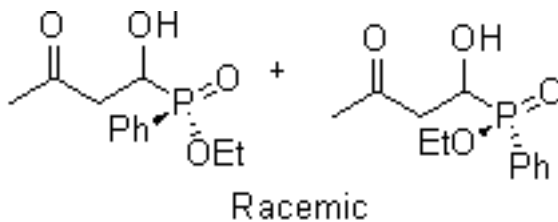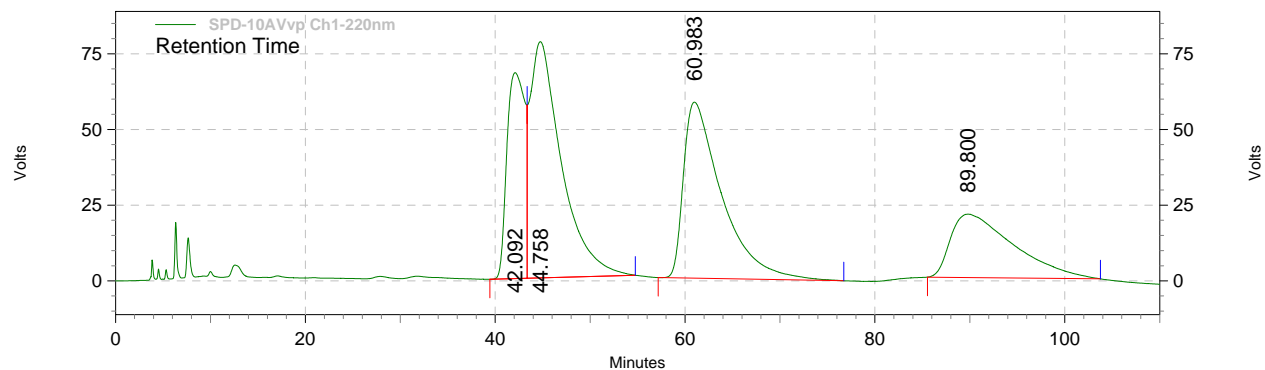

### SPD-10AVvp Ch1-220nm Results

| Retention Time | Area     | Area % | Height | Height % |
|----------------|----------|--------|--------|----------|
| 42.092         | 8863777  | 16.82  | 68017  | 30.22    |
| 44.758         | 17920164 | 34.00  | 77983  | 34.65    |
| 60.983         | 16289168 | 30.90  | 58138  | 25.83    |
| 89.800         | 9636855  | 18.28  | 20934  | 9.30     |
| Totals         | 52709964 | 100.00 | 225072 | 100.00   |

**Area % Report****Method Name:** C:\EZStart\Projects\Default\Methods\AS.met**Data:** C:\EZStart\Projects\Default\Data\vi-ss-391**User:** System**Acquired:** 7/19/2006 11:13:20 AM**Printed:** 4/25/2007 2:36:06 PM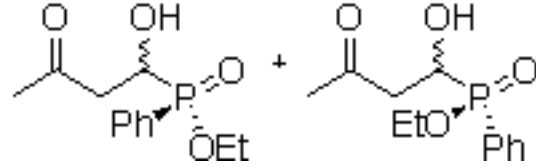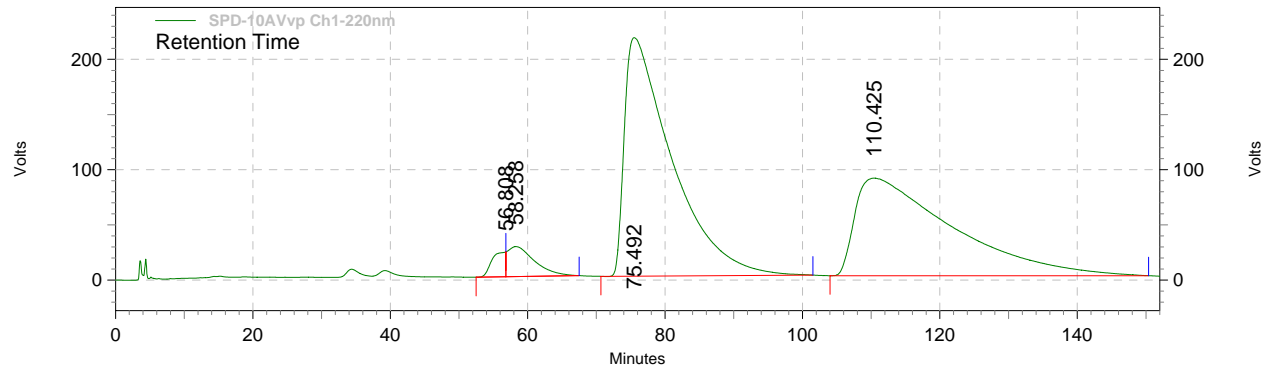**SPD-10AVvp****Ch1-220nm****Results**

| Retention Time | Area      | Area % | Height | Height % |
|----------------|-----------|--------|--------|----------|
| 56.808         | 3079080   | 1.53   | 22484  | 6.35     |
| 58.258         | 7413595   | 3.68   | 27251  | 7.69     |
| 75.492         | 103989510 | 51.62  | 216098 | 60.99    |
| 110.425        | 86982472  | 43.18  | 88508  | 24.98    |
| Totals         | 201464657 | 100.00 | 354341 | 100.00   |

**Area % Report**

**Method Name:** C:\EZStart\Projects\Default\Methods\AS.met  
**Data:** C:\EZStart\Projects\Default\Data\VI-SS-46L1  
**User:** System  
**Acquired:** 8/5/2006 1:28:42 PM  
**Printed:** 4/25/2007 2:37:19 PM

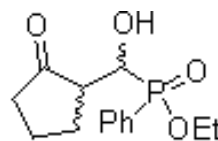

Racemic, Syn

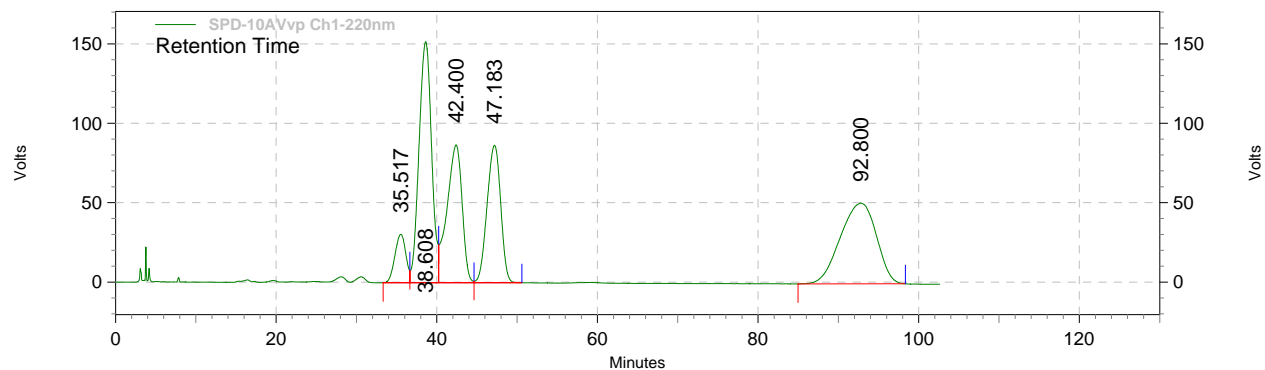

**SPD-10AVvp**  
**Ch1-220nm**  
**Results**

| Retention Time | Area            | Area %        | Height        | Height %      |
|----------------|-----------------|---------------|---------------|---------------|
| 35.517         | 2865142         | 5.04          | 30496         | 7.50          |
| 38.608         | 16533169        | 29.11         | 151729        | 37.33         |
| 42.400         | 11352432        | 19.99         | 86837         | 21.37         |
| 47.183         | 10195706        | 17.95         | 86535         | 21.29         |
| 92.800         | 15850187        | 27.91         | 50847         | 12.51         |
| <b>Totals</b>  | <b>56796636</b> | <b>100.00</b> | <b>406444</b> | <b>100.00</b> |

## Area % Report

**Method Name:** C:\EZStart\Projects\Default\Methods\AS.met  
**Data:** C:\EZStart\Projects\Default\Data\VI-SS-63L1  
**User:** System  
**Acquired:** 8/5/2006 3:13:30 PM  
**Printed:** 4/25/2007 2:39:18 PM

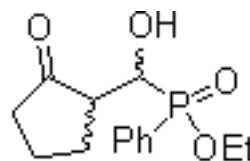

Chiral, Syn

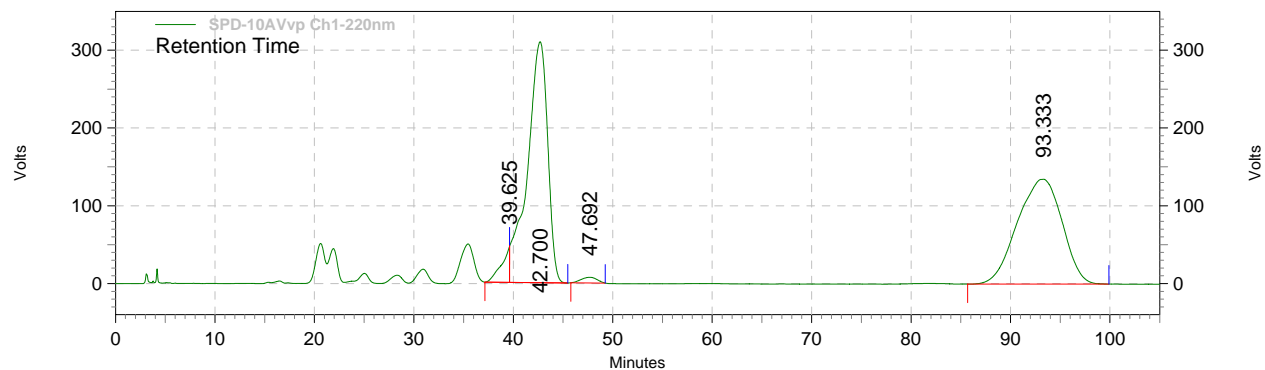

### SPD-10AVvp Ch1-220nm Results

| Retention Time | Area     | Area % | Height | Height % |
|----------------|----------|--------|--------|----------|
| 39.625         | 2543288  | 2.84   | 46373  | 9.31     |
| 42.700         | 43906765 | 49.10  | 309751 | 62.19    |
| 47.692         | 795505   | 0.89   | 7192   | 1.44     |
| 93.333         | 42186405 | 47.17  | 134726 | 27.05    |
| Totals         | 89431963 | 100.00 | 498042 | 100.00   |

**Area % Report**

Method Name: C:\EZStart\Projects\Default\Methods\AS.met  
 Data: C:\EZStart\Projects\Default\Data\VI-SS-53  
 User: System  
 Acquired: 7/28/2006 10:08:57 AM  
 Printed: 4/25/2007 2:40:23 PM

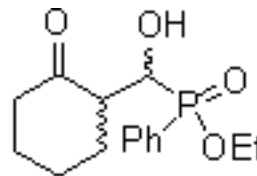

Racemic, anti + syn

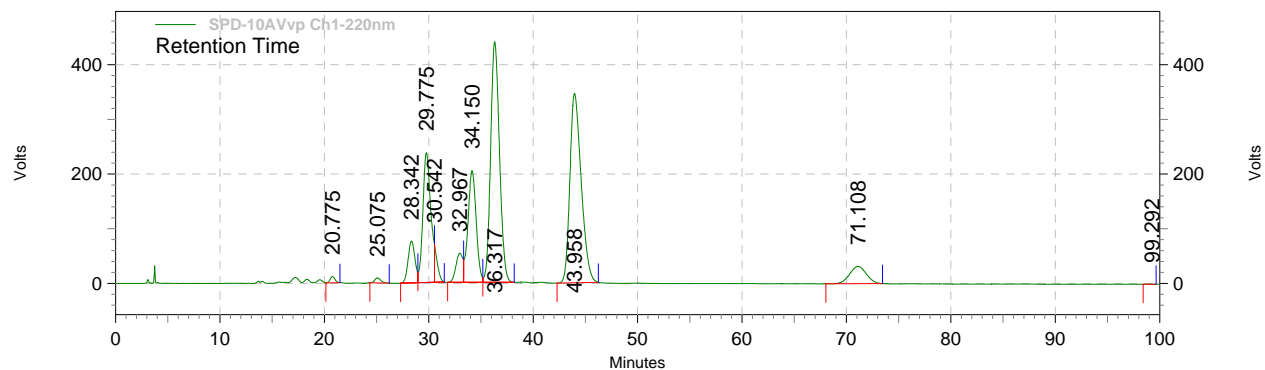

**SPD-10AVvp  
 Ch1-220nm  
 Results**

| Retention Time | Area     | Area % | Height | Height % |
|----------------|----------|--------|--------|----------|
| 20.775         | 359468   | 0.41   | 11427  | 0.77     |
| 25.075         | 364734   | 0.42   | 9243   | 0.62     |
| 28.342         | 3491966  | 4.00   | 76574  | 5.17     |
| 29.775         | 12440202 | 14.27  | 237420 | 16.04    |
| 30.542         | 1314901  | 1.51   | 69656  | 4.70     |
| 32.967         | 2451333  | 2.81   | 53372  | 3.60     |
| 34.150         | 11194228 | 12.84  | 204414 | 13.81    |
| 36.317         | 25994095 | 29.81  | 440277 | 29.74    |
| 43.958         | 26027264 | 29.85  | 346457 | 23.40    |
| 71.108         | 3560556  | 4.08   | 31644  | 2.14     |
| 99.292         | 816      | 0.00   | 24     | 0.00     |

|        |          |        |         |        |
|--------|----------|--------|---------|--------|
| Totals | 87199563 | 100.00 | 1480508 | 100.00 |
|--------|----------|--------|---------|--------|

## Area % Report

**Method Name:** C:\EZStart\Projects\Default\Methods\AS.met  
**Data:** C:\EZStart\Projects\Default\Data\VI-SS-62  
**User:** System  
**Acquired:** 8/7/2006 11:14:26 AM  
**Printed:** 4/25/2007 2:40:57 PM

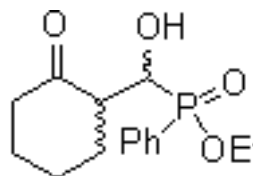

Chiral, anti + syn

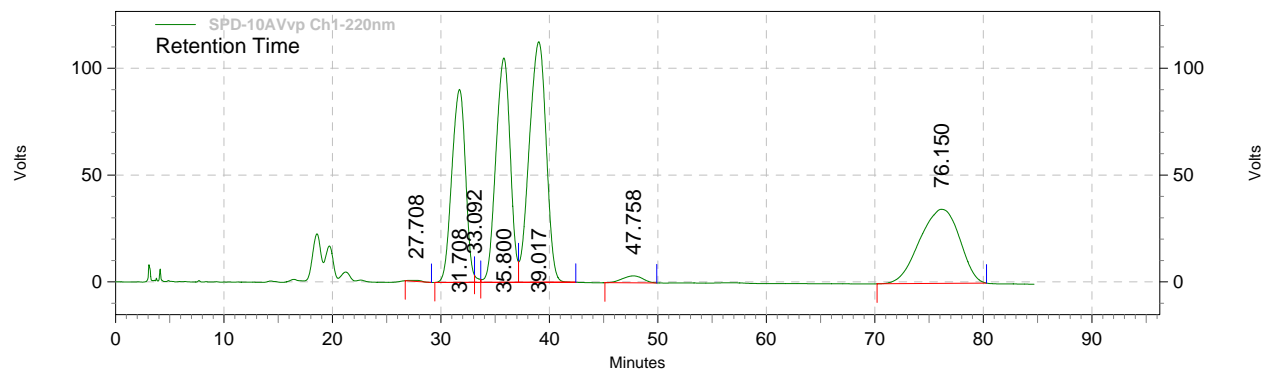

### SPD-10AVvp Ch1-220nm Results

| Retention Time | Area     | Area % | Height | Height % |
|----------------|----------|--------|--------|----------|
| 27.708         | 33965    | 0.09   | 511    | 0.15     |
| 31.708         | 7932167  | 20.23  | 90359  | 25.82    |
| 33.092         | 69246    | 0.18   | 3361   | 0.96     |
| 35.800         | 9663671  | 24.64  | 105077 | 30.03    |
| 39.017         | 12228688 | 31.18  | 112664 | 32.20    |
| 47.758         | 421693   | 1.08   | 3236   | 0.92     |
| 76.150         | 8866306  | 22.61  | 34686  | 9.91     |

|        |          |        |        |        |
|--------|----------|--------|--------|--------|
| Totals | 39215736 | 100.00 | 349894 | 100.00 |
|--------|----------|--------|--------|--------|

## Area % Report

**Method Name:** C:\EZStart\Projects\Default\Methods\AS.met  
**Data:** C:\EZStart\Projects\Default\Data\VI-SS-78F  
**User:** System  
**Acquired:** 8/15/2006 1:19:05 PM  
**Printed:** 4/25/2007 2:41:32 PM

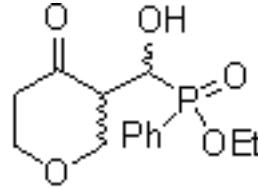

Racemic, anti + syn

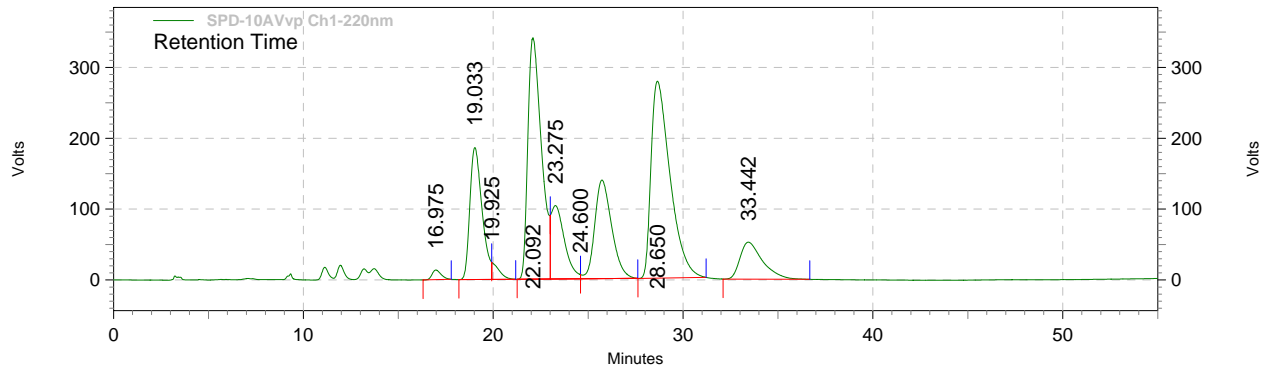

**SPD-10AVvp**  
**Ch1-220nm**  
**Results**

| Retention Time | Area     | Area % | Height | Height % |
|----------------|----------|--------|--------|----------|
| 16.975         | 446247   | 0.70   | 13652  | 1.36     |
| 19.033         | 8305161  | 13.03  | 186364 | 18.55    |
| 19.925         | 627444   | 0.98   | 24132  | 2.40     |
| 22.092         | 17022499 | 26.70  | 340873 | 33.92    |
| 23.275         | 5068369  | 7.95   | 103684 | 10.32    |
| 24.600         | 8644698  | 13.56  | 5890   | 0.59     |
| 28.650         | 19343407 | 30.34  | 278106 | 27.68    |
| 33.442         | 4301600  | 6.75   | 52180  | 5.19     |

|        |          |        |         |        |
|--------|----------|--------|---------|--------|
| Totals | 63759425 | 100.00 | 1004881 | 100.00 |
|--------|----------|--------|---------|--------|



## Area % Report

**Method Name:** C:\EZStart\Projects\Default\Methods\AS.met  
**Data:** C:\EZStart\Projects\Default\Data\VI-SS-80E  
**User:** System  
**Acquired:** 8/16/2006 1:59:53 PM  
**Printed:** 4/25/2007 2:42:13 PM

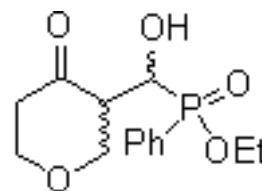

Chiral, anti + syn

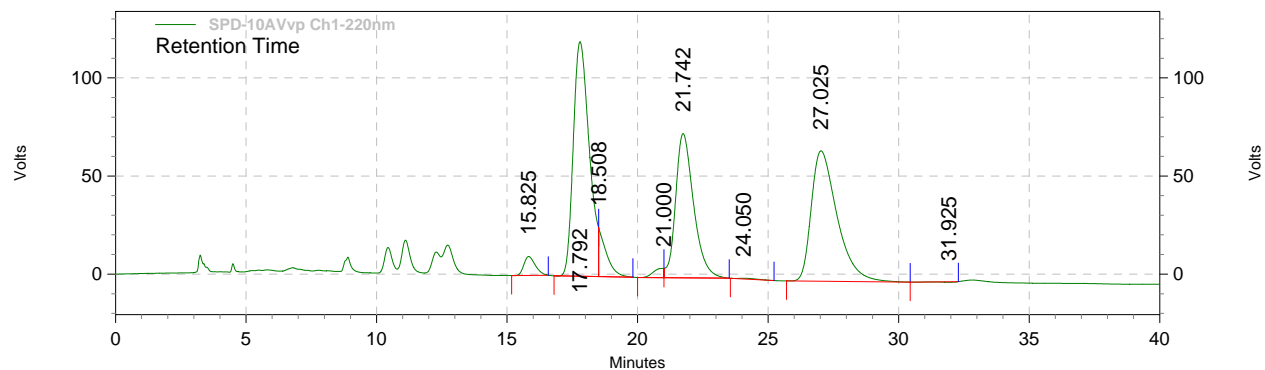

**SPD-10AVvp**  
**Ch1-220nm**  
**Results**

| Retention Time | Area    | Area % | Height | Height % |
|----------------|---------|--------|--------|----------|
| 15.825         | 292638  | 2.07   | 9641   | 3.22     |
| 17.792         | 5060293 | 35.88  | 119527 | 39.93    |
| 18.508         | 506020  | 3.59   | 24884  | 8.31     |
| 21.000         | 129091  | 0.92   | 4758   | 1.59     |
| 21.742         | 3530618 | 25.03  | 73535  | 24.56    |
| 24.050         | 18531   | 0.13   | 338    | 0.11     |
| 27.025         | 4555852 | 32.30  | 66441  | 22.19    |
| 31.925         | 10474   | 0.07   | 248    | 0.08     |

|        |          |        |        |        |
|--------|----------|--------|--------|--------|
| Totals | 14103517 | 100.00 | 299372 | 100.00 |
|--------|----------|--------|--------|--------|
